# Supplementary material for: The preparation of the MF6− (M = As, Sb) salts of 1,4-benzoquinodal bridged bis-1,3,2-dithiazolylium utilizing the cycloaddition and oxidative dehydrogenation chemistry of SNSMF6 and observation of a hybrid semiquinoidal–thiazyl radical-cation by EPR
Source: Royal Society of Chemistry journal article supplement (doi:10.1039/b910338d), 2009-01-01
Supplement: b910338d.pdf [file b910338d.pdf]

## Supplemental Material

For

### The preparation of the $\text{MF}_6^-$ ( $\text{M} = \text{As}, \text{Sb}$ ) salts of 1,4-benzoquinodal bridged bis-1,3,2-dithiazolylium utilizing the cycloaddition and oxidative dehydrogenation chemistry of $\text{SNSMF}_6$ and observation of a hybrid semiquinoidal-thiazyl radical cation by EPR

Andreas Decken,<sup>a</sup> Aaron Mailman,<sup>a</sup> and Jack Passmore<sup>\*a</sup>

| Table of contents:                                                                                                                                                                      | page 1-4 |
|-----------------------------------------------------------------------------------------------------------------------------------------------------------------------------------------|----------|
| 1) Chart 1: Molecules of interest.....                                                                                                                                                  | 4        |
| 2) Scheme 1: Gas phase (B3LYP/6-311++G(d,p)) and energetics in $\text{SO}_2$ solution (PBE0/6-311G(d)).....                                                                             | 5        |
| 3) Figure S1: One piece Pyrex vessels used in Experimental section.....                                                                                                                 | 6        |
| 4) Experimental Section                                                                                                                                                                 |          |
| a. 1.1 Materials.....                                                                                                                                                                   | 6        |
| b. 1.2 General Procedures.....                                                                                                                                                          | 6        |
| i. Calculated (B3LYP/6-311++G(d,p)) structures and NMR tensors with correlation method (See Table S2).....                                                                              | 7        |
| ii. Table S1: X-ray crystallographic data for $\mathbf{1SbF}_6 \cdot \text{C}_6\text{H}_4\text{O}_2$ , $\mathbf{3(AsF}_6)_2 \cdot \text{CH}_3\text{CN}$ and $\mathbf{3(SbF}_6)_2$ ..... | 8        |
| c. 1.3 Computational Details.....                                                                                                                                                       | 8        |
| d. 1.4 Syntheses and Discussion.....                                                                                                                                                    | 9        |
| i. 1.4.1 General procedure for preparation of $\mathbf{1MF}_6$ ( $\text{M} = \text{As}, \text{Sb}$ ) according to Equation 1 in Scheme 1.....                                           | 9        |
| 1. Figure S2: FT-IR of a) crude $\mathbf{1AsF}_6$ and b) purified $\mathbf{1AsF}_6$ as Nujol mull on KBr plates (32 scans, $2 \text{ cm}^{-1}$ resolution)..                            | 10       |
| 2. Figure S3: FT-IR of a) crude $\mathbf{1SbF}_6$ and b) purified $\mathbf{1SbF}_6$ as Nujol mull on KBr plates (32 scans, $2 \text{ cm}^{-1}$ resolution)..                            | 11       |
| ii. 1.4.2 General procedure for purification of $\mathbf{1MF}_6$ ( $\text{M} = \text{As}, \text{Sb}$ ) prepared according to Equation 1 in Scheme 1.....                                | 11       |
| iii. 1.4.3 <i>In situ</i> multinuclear NMR of the reaction of $\mathbf{1SbF}_6$ with excess $\text{SNSSbF}_6$ in $\text{SO}_2$ according to Equation 2-4 in Scheme 1.....               | 12       |
| 1. Figure S4: $^1\text{H}$ -NMR of the <i>in situ</i> NMR reaction of $\mathbf{1SbF}_6$ with excess $\text{SNSSbF}_6$ in liquid $\text{SO}_2$ at $25^\circ\text{C}$ .....               | 14       |
| 2. Figure S5: $^{13}\text{C}$ -NMR of the <i>in situ</i> NMR reaction of $\mathbf{1SbF}_6$ with excess $\text{SNSSbF}_6$ in liquid $\text{SO}_2$ at $25^\circ\text{C}$ .....            | 15       |
| 3. Figure S6: $^{14}\text{N}$ -NMR of the <i>in situ</i> NMR reaction of $\mathbf{1SbF}_6$ with excess $\text{SNSSbF}_6$ in liquid $\text{SO}_2$ at $25^\circ\text{C}$ .....            | 16       |

|      |                                                                                                                                                                                                                                                                                                                           |    |
|------|---------------------------------------------------------------------------------------------------------------------------------------------------------------------------------------------------------------------------------------------------------------------------------------------------------------------------|----|
| 4.   | Table S2: Comparison of calculated (B3LYP/6-311++G(d,p)) and experimental $^{13}\text{C}$ and $^{14}\text{N}$ -NMR tensors of $\mathbf{1}^+$ , $\mathbf{5}^+$ , $\mathbf{5}^*$ , $\mathbf{3}^{2+}$ , $\mathbf{7}^{2+}$ , $\mathbf{8}^{2+}$ and 1,4-benzoquinone ( $\text{C}_6\text{H}_4\text{O}_2$ ).....                 | 17 |
| 5.   | Figure S7: The X-ray crystal structure of $\mathbf{3}(\text{SbF}_6)_2$ where a) a view of the unit cell along the b-axis and b) the atom labelling within the asymmetric unit.....                                                                                                                                        | 18 |
| 6.   | Figure S8: The two slightly distorted $\text{SbF}_6^-$ anions <b>A</b> and <b>B</b> in $\mathbf{3}(\text{SbF}_6)_2$ with bond distances ( $\text{\AA}$ ) and bond angles ( $^\circ$ )..                                                                                                                                   | 19 |
| 7.   | Table S3: Comparison of calculated and experimental bond lengths ( $\text{\AA}$ ) and angles ( $^\circ$ ) of $\mathbf{3}^{2+}$ and $\mathbf{3}^{+*}$ in $\mathbf{3}(\text{AsF}_6)_2 \cdot \text{CH}_3\text{CN}$ and $\mathbf{3}(\text{SbF}_6)_2$ .....                                                                    | 20 |
| iv.  | 1.4.4 Reaction of $\mathbf{1}\text{SbF}_6$ with excess $\text{SNSSbF}_6$ in $\text{SO}_2$ according to Equation 2-4 in Scheme 1. ....                                                                                                                                                                                     | 21 |
| 1.   | Figure S9: The FT-IR of a) crude $\mathbf{3}(\text{SbF}_6)_2$ on KBr plates and b) purified $\mathbf{3}(\text{SbF}_6)_2$ on CsI plates (32 scans, $2\text{ cm}^{-1}$ resolution).....                                                                                                                                     | 23 |
| 2.   | Table S4: Comparison of calculated (B3LYP/6-311++G(d,p)) and experimental IR frequencies for $\mathbf{3}^{2+}$ and $\mathbf{3}^{+*}$ .....                                                                                                                                                                                | 24 |
| 3.   | Table S5: Calculated gas phase (B3LYP/6-311++G(d,p)) and $\text{SO}_2$ solution (PBE1PBE/6-311G(d)) energetics.....                                                                                                                                                                                                       | 26 |
| 4.   | Figure S10: The Raman microscopy (785 nm) of a) insoluble solid obtained in Section 1.4.5 prepared according to Equation 2-4 in Scheme 1 and b) comparison to the Raman of $\text{S}_8$ .....                                                                                                                             | 27 |
| 5.   | Figure S11: The qualitative EDX microanalysis of the insoluble solid obtained in Section 1.4.5 prepared according to Equation 2-4 in Scheme 1 by Scanning Electron Microscopy (SEM).....                                                                                                                                  | 27 |
| v.   | 1.4.5 Purification of $\mathbf{3}(\text{SbF}_6)_2$ prepared according to Equation 2-4 in Scheme 1 from $\text{CH}_3\text{CN}$ and $\text{CH}_2\text{Cl}_2$ .....                                                                                                                                                          | 28 |
| vi.  | 1.4.6 Reduction of $\mathbf{3}(\text{SbF}_6)_2$ with CsI in $\text{SO}_2$ according to Equation 6.....                                                                                                                                                                                                                    | 28 |
| 1.   | Figure S12: Selected frontier molecular orbitals of a) $\mathbf{3}^{2+}$ and b) $\mathbf{3}^{+*}$ calculated at the B3LYP/6-311++G(d,p) level of theory.....                                                                                                                                                              | 29 |
| 2.   | Figure S13: FT-IR of the recovered product from the reduction of $\mathbf{3}(\text{SbF}_6)_2$ with CsI in $\text{SO}_2$ (32 scans, $2\text{ cm}^{-1}$ resolution).....                                                                                                                                                    | 31 |
| 3.   | Table S6: Comparison of calculated (B1LYP//EPR-II/6-31G(2d,p)) and experimental hyperfine coupling constants of $\mathbf{1}^*$ , $\mathbf{5}^*$ , $\mathbf{3}^{+*}$ and the related benzofused 1,3,2-dithiazolyl <b>9</b> .....                                                                                           | 32 |
| vii. | 1.4.7 <i>In situ</i> multinuclear NMR of the reaction of $\text{SNSSbF}_6$ and with two equivalents of 1,4-benzoquinone ( $\text{C}_6\text{H}_4\text{O}_2$ ) in liquid $\text{SO}_2$ designed to give $\mathbf{5}\text{SbF}_6$ and 1,4-hydroquinone ( $\text{C}_6\text{H}_4(\text{OH})_2$ ) according to Equation 7b..... | 32 |

|       |                                                                                                                                                                                                                                                                                                                                     |    |
|-------|-------------------------------------------------------------------------------------------------------------------------------------------------------------------------------------------------------------------------------------------------------------------------------------------------------------------------------------|----|
| 1.    | Figure S14: $^1\text{H}$ -NMR of the <i>in situ</i> NMR of the reaction of $\text{SNSSbF}_6$ and with two equivalents of 1,4-benzoquinone in liquid $\text{SO}_2$ at $25^\circ\text{C}$ .....                                                                                                                                       | 35 |
| 2.    | Figure S15: $^{13}\text{C}$ -NMR of the <i>in situ</i> NMR of the reaction of $\text{SNSSbF}_6$ and with two equivalents of 1,4-benzoquinone in liquid $\text{SO}_2$ at $25^\circ\text{C}$ .....                                                                                                                                    | 35 |
| 3.    | Figure S16: $^{14}\text{N}$ -NMR of the <i>in situ</i> NMR of the reaction of $\text{SNSSbF}_6$ and with two equivalents of 1,4-benzoquinone in liquid $\text{SO}_2$ at $25^\circ\text{C}$ .....                                                                                                                                    | 36 |
| 4.    | Figure S17: A representative view of the single crystal X-ray structure determination of $\mathbf{1SbF}_6\cdot\text{C}_6\text{H}_4\text{O}_2$ and the $\text{SbF}_6^-$ anions.....                                                                                                                                                  | 37 |
| 5.    | Figure S18: FT-IR of reaction of two equivalents of 1,4-benzoquinone ( $\text{C}_6\text{H}_4\text{O}_2$ ) with $\text{SNSSbF}_6$ to giving $\mathbf{1SbF}_6\cdot\text{C}_6\text{H}_4\text{O}_2$ as Nujol mull on KBr plates (32 scans, $2\text{ cm}^{-1}$ resolution).....                                                          | 38 |
| 6.    | Table S7: Comparison of calculated (B3LYP/6-311++G(d,p)) bond lengths ( $\text{\AA}$ ) and angles ( $^\circ$ ) of $\mathbf{1SbF}_6$ and 1,4-benzoquinone ( $\text{C}_6\text{H}_4\text{O}_2$ ) and experimental bond lengths ( $\text{\AA}$ ) and angles ( $^\circ$ ) for $\mathbf{1SbF}_6\cdot\text{C}_6\text{H}_4\text{O}_2$ ..... | 39 |
| 7.    | Table S8: Comparison of calculated (B3LYP/6-311++G(d,p)) and experimental IR frequencies for $\mathbf{1MF}_6$ ( $\text{M} = \text{As}, \text{Sb}$ ), $\mathbf{1SbF}_6\cdot\text{C}_6\text{H}_4\text{O}_2$ and 1,4-benzoquinone ( $\text{C}_6\text{H}_4\text{O}_2$ ).....                                                            | 41 |
| 8.    | Table S9: Comparison of experimental and calculated (B3LYP/6-311++G(d,p)) bond lengths ( $\text{\AA}$ ) and angles ( $^\circ$ ) of 1,4-Benzoquinone ( $\text{C}_6\text{H}_4\text{O}_2$ ).....                                                                                                                                       | 43 |
| viii. | 1.4.8 Oxidation of $\mathbf{1AsF}_6$ with three equivalents of $\text{AsF}_5$ in the presence of $\text{NEt}_3$ leading to $\mathbf{5AsF}_6$ according to Equation 5....                                                                                                                                                            | 43 |
|       | 1. Figure S19: FT-IR of $\mathbf{5AsF}_6$ prepared according to Equation 5 as Nujol mull on KBr plates.....                                                                                                                                                                                                                         | 45 |
|       | 2. Table S10: Comparison of calculated (B3LYP/6-311++G(d,p)) and experimental IR frequencies for $\mathbf{5}^+$ and $\mathbf{5}^\bullet$ .....                                                                                                                                                                                      | 46 |
| ix.   | 1.4.9 Multinuclear NMR of $\mathbf{5AsF}_6$ in liquid $\text{SO}_2$ prepared according to Equation 5.....                                                                                                                                                                                                                           | 47 |
|       | 1. Figure S20: $^1\text{H}$ -NMR of $\mathbf{5AsF}_6$ prepared according to Equation 5 in liquid $\text{SO}_2$ at $25^\circ\text{C}$ .....                                                                                                                                                                                          | 48 |
|       | 2. Figure S21: $^{13}\text{C}$ -NMR of $\mathbf{5AsF}_6$ prepared according to Equation 5 in liquid $\text{SO}_2$ at $25^\circ\text{C}$ where a) coupled to establish C-H assignment and b) is decoupled.....                                                                                                                       | 48 |
|       | 3. Figure S22: $^{14}\text{N}$ -NMR of $\mathbf{5AsF}_6$ prepared according to Equation 5 in liquid $\text{SO}_2$ at $25^\circ\text{C}$ .....                                                                                                                                                                                       | 49 |
|       | 4. Figure S23: $^{19}\text{F}$ -NMR of $\mathbf{5AsF}_6$ prepared according to Equation 5 in liquid $\text{SO}_2$ at $25^\circ\text{C}$ .....                                                                                                                                                                                       | 49 |
| x.    | 1.4.10 <i>In situ</i> reduction of $\mathbf{5AsF}_6$ with ferrocene ( $\text{Cp}_2\text{Fe}$ ) in $\text{CH}_2\text{Cl}_2$ and toluene according to Equation 8.....                                                                                                                                                                 | 50 |
| xi.   | 1.4.11 Reduction of $\mathbf{5AsF}_6$ with ferrocene ( $\text{Cp}_2\text{Fe}$ ) in $\text{CH}_2\text{Cl}_2$ according to Equation 8.....                                                                                                                                                                                            | 50 |

|       |                                                                                                                                                                                                                   |    |
|-------|-------------------------------------------------------------------------------------------------------------------------------------------------------------------------------------------------------------------|----|
| 1.    | Figure S24: The X-band EPR of <b>5</b> <sup>•</sup> prepared according to Equation 8 in CH <sub>2</sub> Cl <sub>2</sub> at 25 °C.....                                                                             | 51 |
| 2.    | Figure S25: The FT-IR of <b>5</b> <sup>•</sup> prepared according to Equation 8 as a Nujol mull on KBr. ....                                                                                                      | 52 |
| xii.  | 1.4.12 Reaction of <b>5</b> AsF <sub>6</sub> with excess SNSAsF <sub>6</sub> in SO <sub>2</sub> leading to <b>3</b> (AsF <sub>6</sub> ) <sub>2</sub> according to Equation 3-4 in Scheme 1.....                   | 52 |
| 1.    | Figure S26: FT-IR of a) crude <b>3</b> (AsF <sub>6</sub> ) <sub>2</sub> prepared according to Equation 3-4 in Scheme 1 and b) purified <b>3</b> (AsF <sub>6</sub> ) <sub>2</sub> as Nujol mull on KBr plates..... | 54 |
| 2.    | Figure S27: The <sup>13</sup> C-NMR (CD <sub>3</sub> CN, 25 °C) of <b>3</b> (AsF <sub>6</sub> ) <sub>2</sub> prepared according to Equation 3-4 in Scheme 1.....                                                  | 55 |
| xiii. | 1.4.13 Purification of <b>3</b> (AsF <sub>6</sub> ) <sub>2</sub> prepared according to Equation 3-4 in Scheme 1 from CH <sub>3</sub> CN and CH <sub>2</sub> Cl <sub>2</sub> .....                                 | 55 |
| 1.    | The X-ray crystal structure of <b>3</b> (AsF <sub>6</sub> ) <sub>2</sub> •CH <sub>3</sub> CN where a) a view of the unit cell along the b-axis and b) the atom labelling within the asymmetric unit.....          | 56 |
| 5)    | References.....                                                                                                                                                                                                   | 57 |

<sup>a</sup> Department of Chemistry, University of New Brunswick, Fredericton, Canada, NB, E3B 5A3; \* Tel: 5064544981; E-mail: passmore@unb.ca

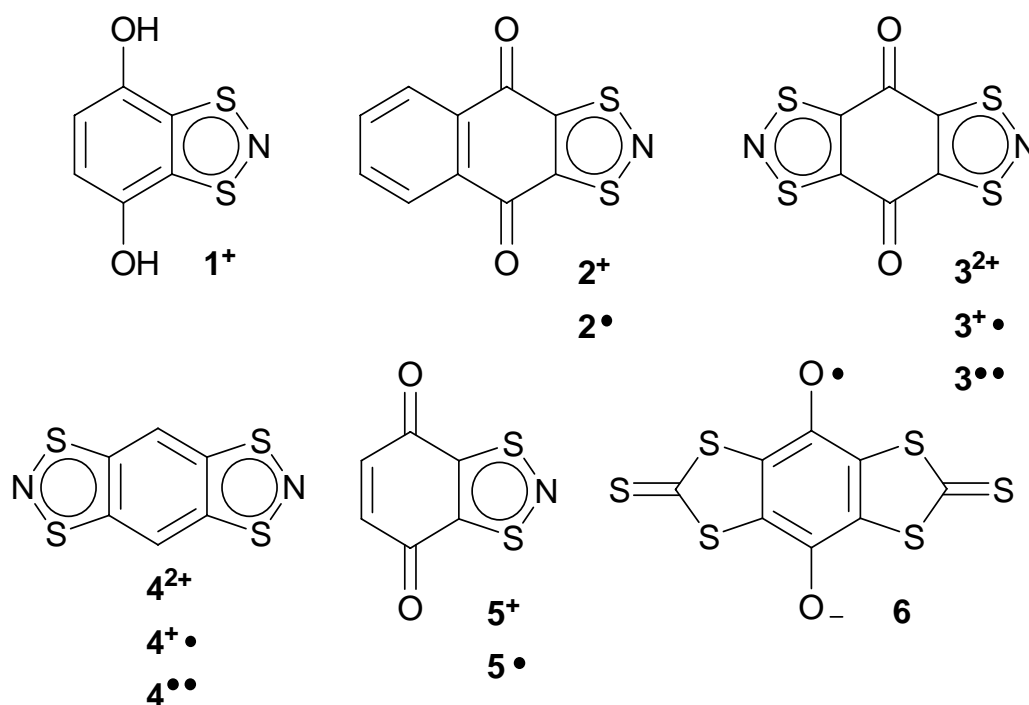

Chart 1: Molecules of Interest

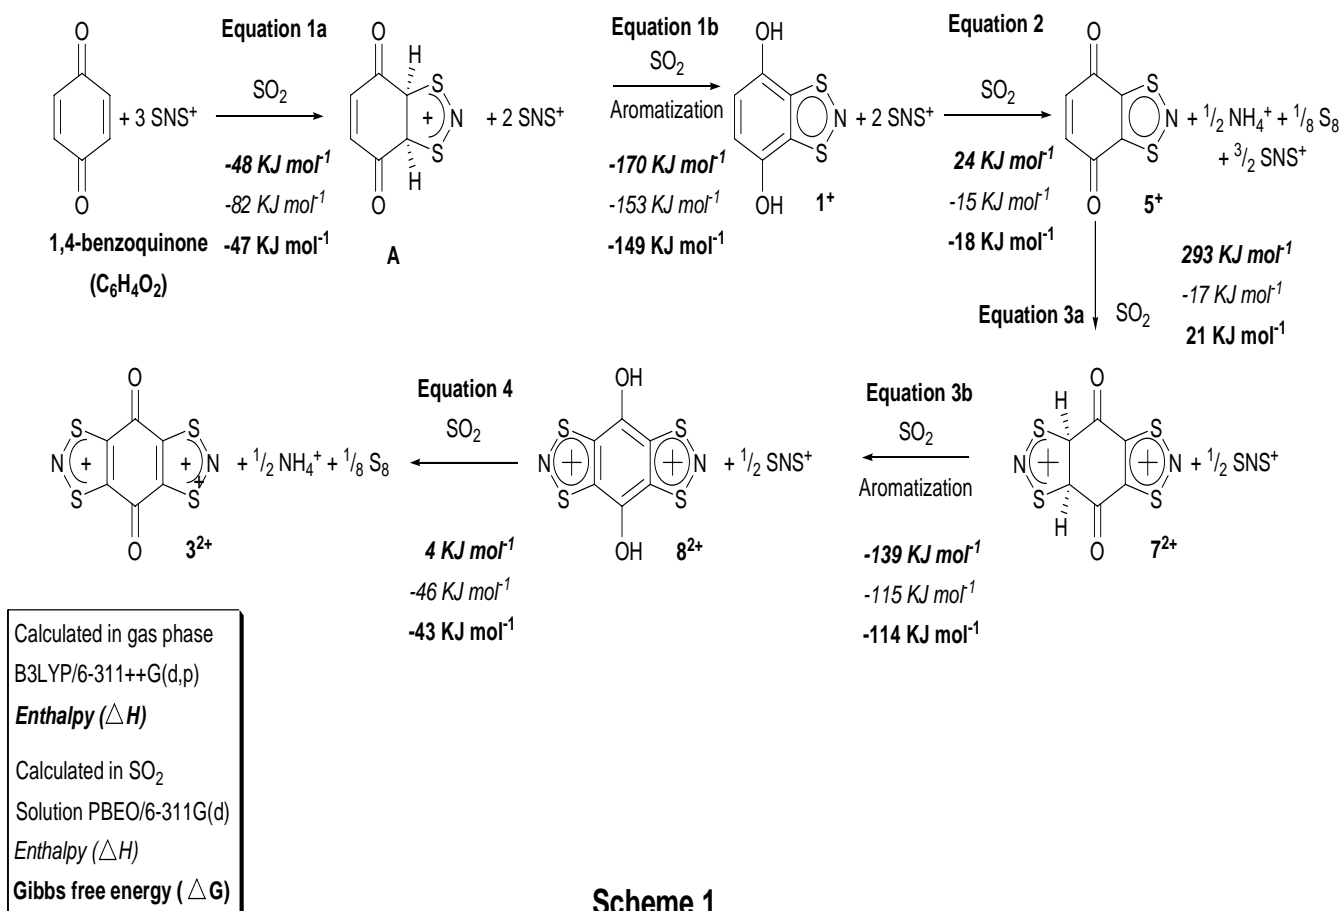

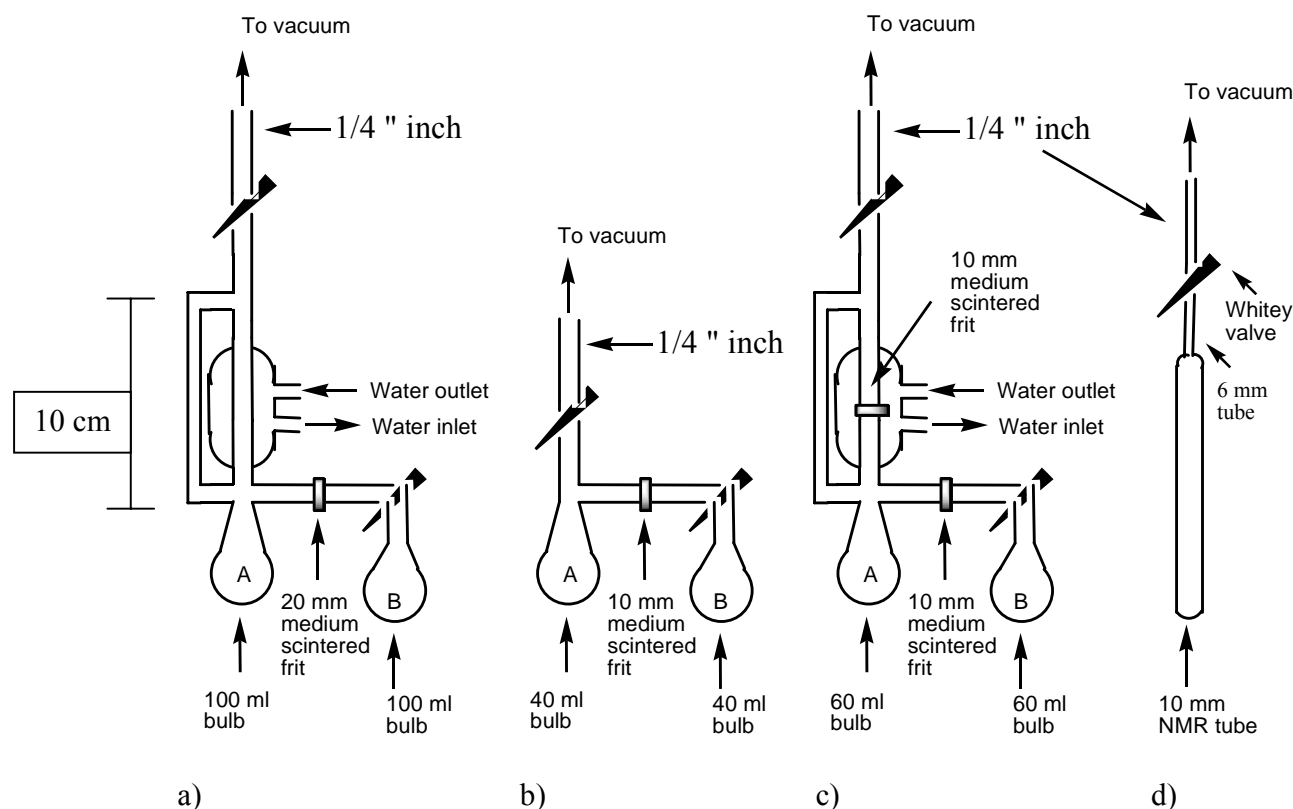

**Figure S1:** One piece Pyrex vessels used in Experimental section.

### S1: Experimental Section:

**1.1 Materials:** SNSMF<sub>6</sub> (M = As, Sb) were prepared and purified according to literature procedures. Ferrocene (Cp<sub>2</sub>Fe, Aldrich, 98%) and 1,4-benzoquinone (Aldrich, 98%) were purified by vacuum sublimation prior to use. Arsenic pentafluoride (AsF<sub>5</sub>, Ozark-Mahoney, 98%) was used as received or prepared from AsF<sub>3</sub> according to literature procedure<sup>1</sup>. CsI (Strem, 98 %) was used as received. Sulfur dioxide (SO<sub>2</sub>, Liquid Air, 99.9998% was stored over CaH<sub>2</sub> for at least 24 hrs and freshly distilled prior to use (*Caution!* SO<sub>2</sub> is a condensable gas with a high vapour pressure (~3.25 atm at 20°C) which should be handled in well ventilated fumehood, leather gloves, face shield, blast shield, carefully built pyrex vessel). Acetonitrile (CH<sub>3</sub>CN, HPLC grade) and dichloromethane (CH<sub>2</sub>Cl<sub>2</sub>, HPLC grade) were dried over refluxing CaH<sub>2</sub> for 24 hrs and distilled onto fresh CaH<sub>2</sub> under nitrogen atmosphere. Acetonitrile was degassed by three freeze-pump-thaw cycles and freshly distilled *in vacuo* prior to use.

**1.2 General Procedures.** Pyrex vessels of three types (Figure S1a-c) were employed throughout unless otherwise stated: Type A, incorporating a water cooled reflux condenser and two bulbs (100 ml) separated by a 20 mm medium frit and closed by two Rotoflo (6 HK) Teflon in glass valves (See Figure S1a) Type B, incorporating two bulbs (40 ml) separated by a 10 mm medium scintered frit and closed by two J. Young (POR/10/RA) Teflon in glass valves (See Figure S1b) with a Teflon coated stir bar in bulb B. Type C, incorporating a 10 mm medium scintered frit centered in a water cooled condenser with a pressure equalizing side-arm with two 60 ml bulbs separated by a second 10 mm medium scintered frit and two Rotoflo (6 HK) Teflon in glass valves (See

Figure S1c). One piece 10 mm (o.d.) NMR tubes with ¼ inch (6 mm, o.d.) Pyrex tube were connected to stainless steel Whitey<sup>®</sup> valves (1KS4) by Swagelok<sup>®</sup> compression fittings, using Teflon back and front ferrules. The Whitey<sup>®</sup> valves were attached directly to the vacuum line by ¼ inch Monel tubing (See Figure S1d). The NMR tubes were cooled with liquid N<sub>2</sub> and flame sealed at the ¼ inch (6 mm) Pyrex tube.

Solids were manipulated under a dry N<sub>2</sub> or Argon atmosphere in an MBraun drybox (O<sub>2</sub> ≤ 0.1 ppm and H<sub>2</sub>O ≤ 0.1 ppm). Techniques and apparatus for carrying out reactions in SO<sub>2</sub> in a closed greaseless Monel vacuum line, such that volatile materials can be transferred quantitatively, have been described elsewhere.<sup>2</sup>

FT-IR spectra were recorded on a Thermo Nicolet NEXUS 470 FT-IR (32 scans, resolution 2 cm<sup>-1</sup>) as Nujol mulls between CsI or KBr plates.

Dispersive Raman microscopy at 298 K of samples contained in sealed melting point tubes were recorded on a Renishaw inVia RE 08 microscope with CCD detector (diode laser operating at 785 nm, 10 mW laser power at the source, ~ 1 mW at the sample, 4 cm<sup>-1</sup> resolution, 20 scans with cosmic ray removal).

Electron paramagnetic resonance (EPR) solution spectra were obtained on an X-band Magnetech MS200 high sensitivity X-band (9.3 - 9.55 GHz) spectrometer. Microwave frequencies were measured with an XL Microwave, model 5200 frequency counter.

NMR spectra were recorded on a Varian 400 NMR spectrometer in 10 mm NMR tubes that were flame sealed. The <sup>1</sup>H-NMR (399.945 MHz, 25 °C) were recorded with a minimum of 20 transients and were externally referenced to TMS (<sup>1</sup>H). Both the coupled and decoupled <sup>13</sup>C-NMR (100.58 MHz, 25 °C) were recorded with a minimum of 2000 transients and a standard line broadening of 4 used to reduce signal to noise and were externally referenced to TMS (<sup>13</sup>C). The <sup>14</sup>N-NMR (28.901 MHz, 25 °C) were recorded at 25 °C with a minimum of 500 transients and a standard line broadening of 40-48 applied to reduce signal to noise and were externally referenced to neat nitromethane (<sup>14</sup>N). The <sup>19</sup>F-NMR (370 MHz, 25 °C) were recorded with a minimum of 20 transients and were externally referenced to CFCl<sub>3</sub> (<sup>19</sup>F) in SO<sub>2</sub>. <sup>13</sup>C-NMR spectra obtained in CD<sub>3</sub>CN were recorded with a minimum of 10000 transients and referenced internally to the solvent (CH<sub>3</sub>-CN, δ 118.26 ppm).<sup>3</sup> Elemental analyses were carried out by Galbraith Laboratories, Inc., Knoxville, TN, USA.

#### **Calculated (B3LYP/6-311++G(d,p)) structures and NMR tensors with correlation method (See Table S2 below):**

All geometries were optimized and found to be true minima by vibration analysis at the B3LYP/6-311++G(d,p) level of theory using the Gaussian 03W suite of programmes.<sup>4</sup> The geometries of **1**<sup>+</sup> (C<sub>2v</sub>), **3**<sup>2+</sup> (C<sub>2</sub>), **5**<sup>+</sup> (C<sub>2v</sub>), **5**<sup>•</sup> (C<sub>2v</sub>), **7**<sup>2+</sup> (C<sub>1</sub>), **8**<sup>2+</sup> (C<sub>1</sub>) and 1,4-benzoquinone (C<sub>6</sub>H<sub>4</sub>O<sub>2</sub>, D<sub>2h</sub>) in Scheme 1 were used to calculate the NMR tensors at the same level of theory (B3LYP/6-311++G(d,p)) and referenced to benzene for <sup>13</sup>C (49.8 ppm, D<sub>6h</sub>) and TMS for <sup>1</sup>H (31.981, T<sub>d</sub>) as a standard according to [1]:

$$| \text{Compound} | - \text{Reference (benzene)} = \text{Chemical shift (calculated)} \quad [1]$$

Given the experimental <sup>13</sup>C chemical shift of benzene in SO<sub>2</sub> relative to TMS (129.2 ppm)<sup>5</sup>, correlation of the calculated <sup>13</sup>C-NMR chemical shifts with the experimental values provided very good agreement<sup>6</sup> according to:

$$\text{Benzene Experimental} - \text{Chemical shift (calculated)} \quad [2]$$

The correlation of the calculated  $^1\text{H-NMR}$  chemical shifts relative to TMS (0 ppm) according to [2] provides qualitative agreement with respect to the experimental chemical shifts (See Table S2).

**Table S1:** X-ray crystallographic data for  $1\text{SbF}_6 \cdot \text{C}_6\text{H}_4\text{O}_2$ ,  $3(\text{AsF}_6)_2 \cdot \text{CH}_3\text{CN}$  and  $3(\text{SbF}_6)_2$

|                                                               | $1\text{SbF}_6 \cdot \text{C}_6\text{H}_4\text{O}_2$              | $3(\text{AsF}_6)_2 \cdot \text{CH}_3\text{CN}$                               | $3(\text{SbF}_6)_2$                                                |
|---------------------------------------------------------------|-------------------------------------------------------------------|------------------------------------------------------------------------------|--------------------------------------------------------------------|
| Formula                                                       | $\text{C}_{12}\text{H}_8\text{F}_6\text{NO}_4\text{S}_2\text{Sb}$ | $\text{C}_8\text{H}_3\text{As}_2\text{F}_{12}\text{N}_3\text{O}_2\text{S}_4$ | $\text{C}_6\text{F}_{12}\text{N}_2\text{O}_2\text{S}_4\text{Sb}_2$ |
| $a$ (Å)                                                       | 9.0959(5)                                                         | 18.343(4)                                                                    | 6.7574(12)                                                         |
| $b$ (Å)                                                       | 12.9028(7)                                                        | 8.0690(13)                                                                   | 7.6967(14)                                                         |
| $c$ (Å)                                                       | 14.2415(8)                                                        | 15.085(3)                                                                    | 17.669(3)                                                          |
| $\alpha$ (deg)                                                | 90.00                                                             | 90.00                                                                        | 87.882(2)                                                          |
| $\beta$ (deg)                                                 | 93.500(1)                                                         | 120.246(4)                                                                   | 88.198(2)                                                          |
| $\gamma$ (deg)                                                | 90.00                                                             | 90.00                                                                        | 70.539(2)                                                          |
| $V$ (Å <sup>3</sup> )                                         | 1680.02(16)                                                       | 1928.9(6)                                                                    | 865.7(3)                                                           |
| $Z$                                                           | 4                                                                 | 4                                                                            | 2                                                                  |
| Space group                                                   | $\text{P}2_1/\text{c}$                                            | $\text{C}2/\text{c}$                                                         | $\text{P}-1$                                                       |
| Cryst syst                                                    | monoclinic                                                        | monoclinic                                                                   | triclinic                                                          |
| Color and habit                                               | Black,<br>Irregular                                               | Colorless,<br>Parallelepiped                                                 | Colorless,<br>Parallelepiped                                       |
| Fw                                                            | 530.06                                                            | 679.21                                                                       | 731.82                                                             |
| $T$ (K)                                                       | 173(1)                                                            | 173(1)                                                                       | 173                                                                |
| $\lambda$ (Å)                                                 | 0.71073                                                           | 0.71073                                                                      | 0.71073                                                            |
| $\rho_{\text{calcd}}$ (Mg/m <sup>3</sup> )                    | 2.096                                                             | 2.339                                                                        | 2.807                                                              |
| $\mu$ (mm <sup>-1</sup> )                                     | 1.973                                                             | 4.024                                                                        | 3.733                                                              |
| reflns collected                                              | 8267                                                              | 6425                                                                         | 6005                                                               |
| independent reflns                                            | 2856                                                              | 2155                                                                         | 3757                                                               |
| $R1, wR2$                                                     | 0.0221, 0.0539                                                    | 0.0229, 0.0517                                                               | 0.0270, 0.0690                                                     |
| Largest diff. peak and hole (e <sup>-</sup> Å <sup>-3</sup> ) | 0.702 and -0.268                                                  | 0.499 and -0.264                                                             | 1.096 and -1.073                                                   |
| CCDC                                                          | 732426                                                            | 732425                                                                       | 732427                                                             |

**1.3 Computational Details.** Geometry optimizations and vibrational frequencies of all molecules were carried out using the B3LYP method<sup>7</sup> and the 6-311++G(d,p) basis set<sup>8</sup>. All structures were found to be minima as indicated by the absence of imaginary frequencies. NMR tensors were calculated using the GIAO method, while the single point free energies in solution were calculated using a polarization continuum model (PCM) with the integral equation formalism (IEF)<sup>9</sup>, employing the PBE0 DFT hybrid functional<sup>10</sup> and using the gas-phase optimized structures (confirmed as minima by the absence of imaginary frequencies) as inputs. The following parameters were used to describe the solvent  $\text{SO}_2$ : dielectric constant ( $\epsilon_{\text{ps}}$ ) = 14.0, solvent radius ( $R_{\text{solv}}$ ) = 2.021 Å, molar volume ( $V(\text{SO}_2)$ ) = 46.75 Å<sup>3</sup> = 0.0468 nm<sup>3</sup> (used later in this paper), numeral density ( $q$ ) = 0.01288 Å<sup>-3</sup>, density = 1.37027 g cm<sup>-3</sup> as implement in *Gaussian 03W*.<sup>4</sup> Hyperfine coupling constants were calculated using the optimized structures and the B1LYP method<sup>11,7b</sup> and the EPR-II basis set<sup>12</sup> for all H, C, N, O atoms, while the 6-



31G(2d,p) basis set was used for S atoms as implemented in *Gaussian 98W*.<sup>13</sup> Vibrational frequencies were animated and assigned using *ChemCraft* Version 1.5.<sup>14</sup>

**1.4. Syntheses. Caution!** *Precautions should be taken to avoid explosion hazard when heating liquid SO<sub>2</sub> in a closed vessel (well ventilated fumehood, leather gloves, face shield, blast shield, carefully built pyrex vessel) and the use of pressure release valves are recommended. Arsenic pentafluoride (AsF<sub>5</sub>) is extremely toxic and corrosive and should be handled in a well ventilated fumehood with a good metal vacuum line.*

#### 1.4.1 General procedure for preparation of **1MF<sub>6</sub>** (M = As, Sb) according to Equation 1 in Scheme 1.<sup>15</sup>

In a typical reaction, SNSMF<sub>6</sub> (~ 5 mmol; ~ 1.57 g for M = Sb and ~ 1.34 g for M = As) and a slight excess (~ 5 %) of 1,4-benzoquinone (~ 5.5 mmol, ~ 0.595 g) were loaded into separate bulbs of a vessel of Type B (Figure S1b). A stir bar was added to the bulb containing 1,4-benzoquinone. SO<sub>2</sub> (~20-30 ml) was condensed onto reactants in bulb A and B. Upon warming to ambient temperature two yellow solutions were obtained in both bulb A and B. Small aliquots (~1-2 ml) of SNSMF<sub>6</sub> solution were gradually added to the stirring solution of 1,4-benzoquinone over 30 min. at ambient temperature. The solution gradually darkened from yellow-brown to a forest green solution with stirring for 2-4 hours. After stirring for an additional 8 hrs a deep royal blue solution is obtained. The volatiles were removed under dynamic vacuum giving a dark blue solid which was collected in the drybox, with isolated yields of 95-98 % (~ 2.06 g of **1SbF<sub>6</sub>** and ~ 1.85 g of **1AsF<sub>6</sub>** based on SNSMF<sub>6</sub> and Equation 1 in Scheme 1. The IR was checked as a Nujol mull on KBr plates (See Figure S2a (**1AsF<sub>6</sub>**) and S3a (**1SbF<sub>6</sub>**)) and are compared to the calculated IR frequencies in Table S9.

#### Comments:

1) The presence of the slight excess of 1,4-benzoquinone used above in Section 1.4.1 can be detected by IR (c.f.  $\nu$  C=O is 1685-1650; See Figure S2a and S3a)<sup>16</sup> and can be detrimental to further reactions if not removed (e.g. Section 1.4.4). However, the preparation of **3(MF<sub>6</sub>)<sub>2</sub>** according to Equation 2-4 in Scheme 1 (Section 1.4.11) is not affected by the presence of 1,4-benzoquinone.

2) The use of excess 1,4-benzoquinone in Section 1.4.1 is recommended for large scale (> 5 mmol) preparation of **1SbF<sub>6</sub>**, however the use of very pure SNSMF<sub>6</sub> and small scales (~ 1 mmol) in dilute solution leads to analytically pure **1MF<sub>6</sub>**.<sup>15</sup>

#### Equation 1 according to Scheme 1:

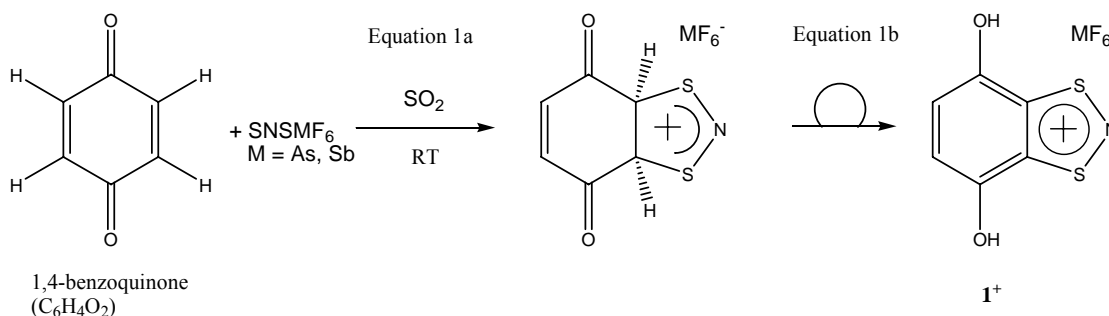

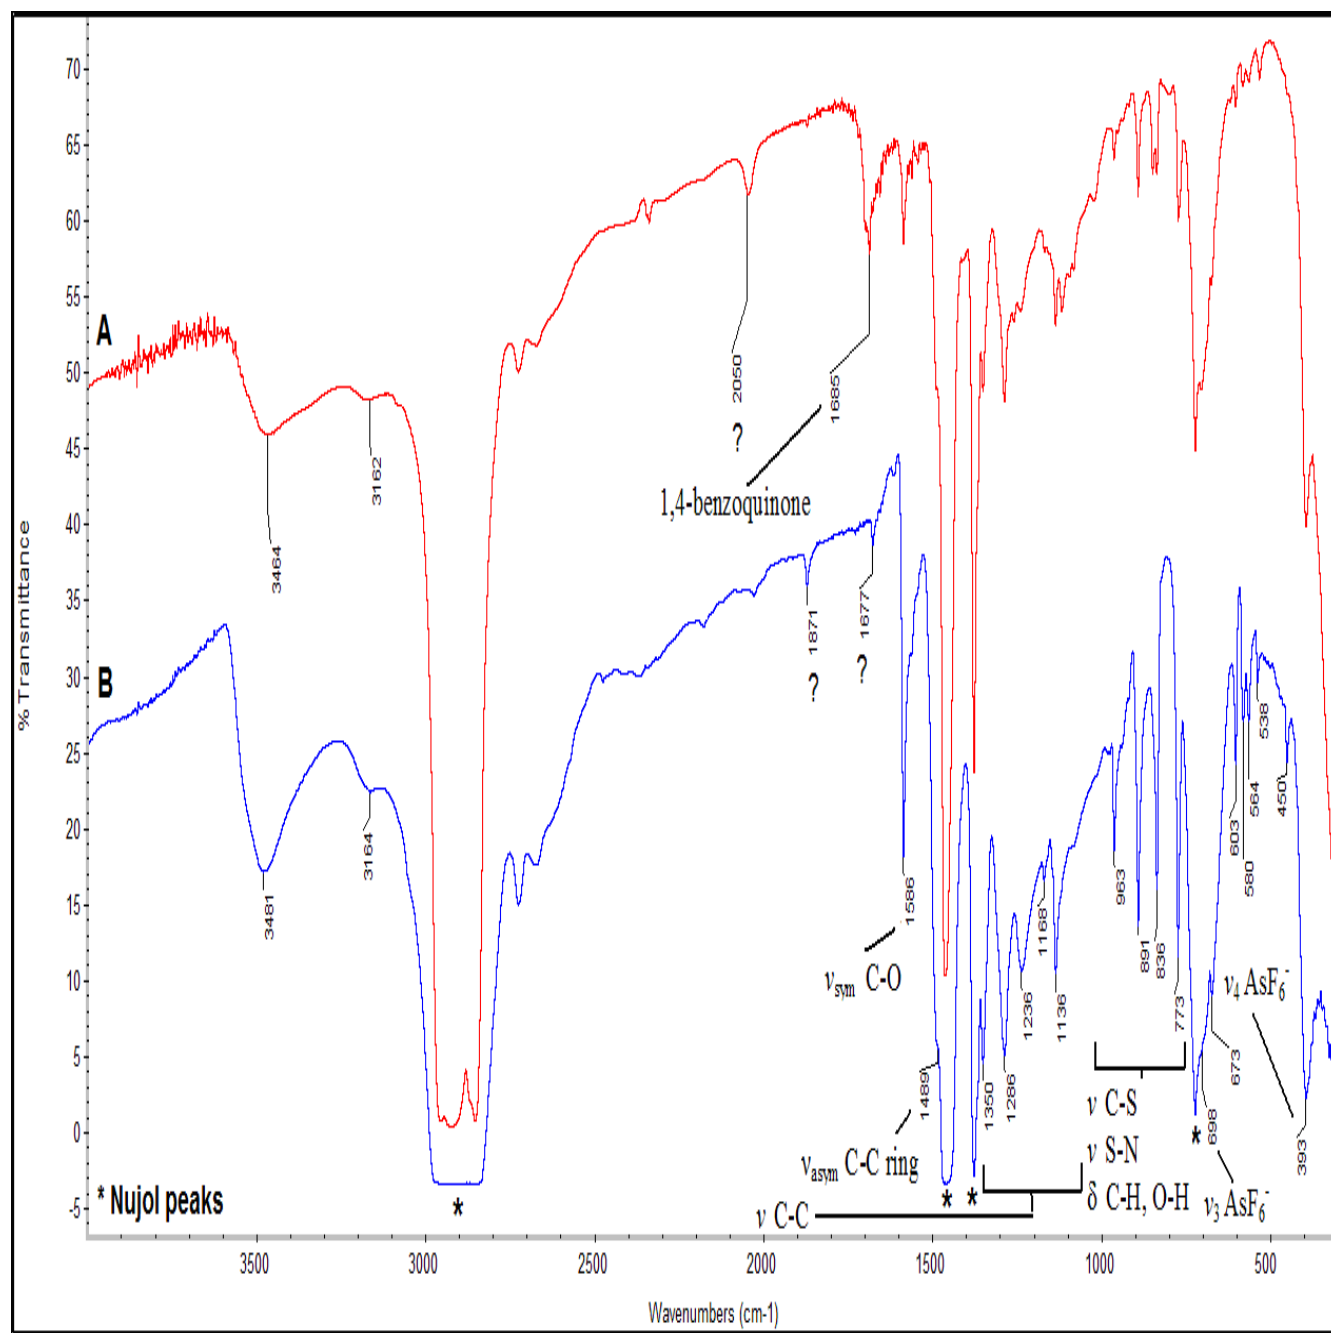

**Figure S2:** FT-IR of a) crude 1AsF<sub>6</sub> and b) purified 1AsF<sub>6</sub> as Nujol mull on KBr plates (32 scans, 2 cm<sup>-1</sup> resolution). See Table S9 for comparison of experimental and calculated IR frequencies and tentative assignments (Note the tentative assignments: v = stretch, δ = bending, asym. = asymmetric and sym = symmetric):

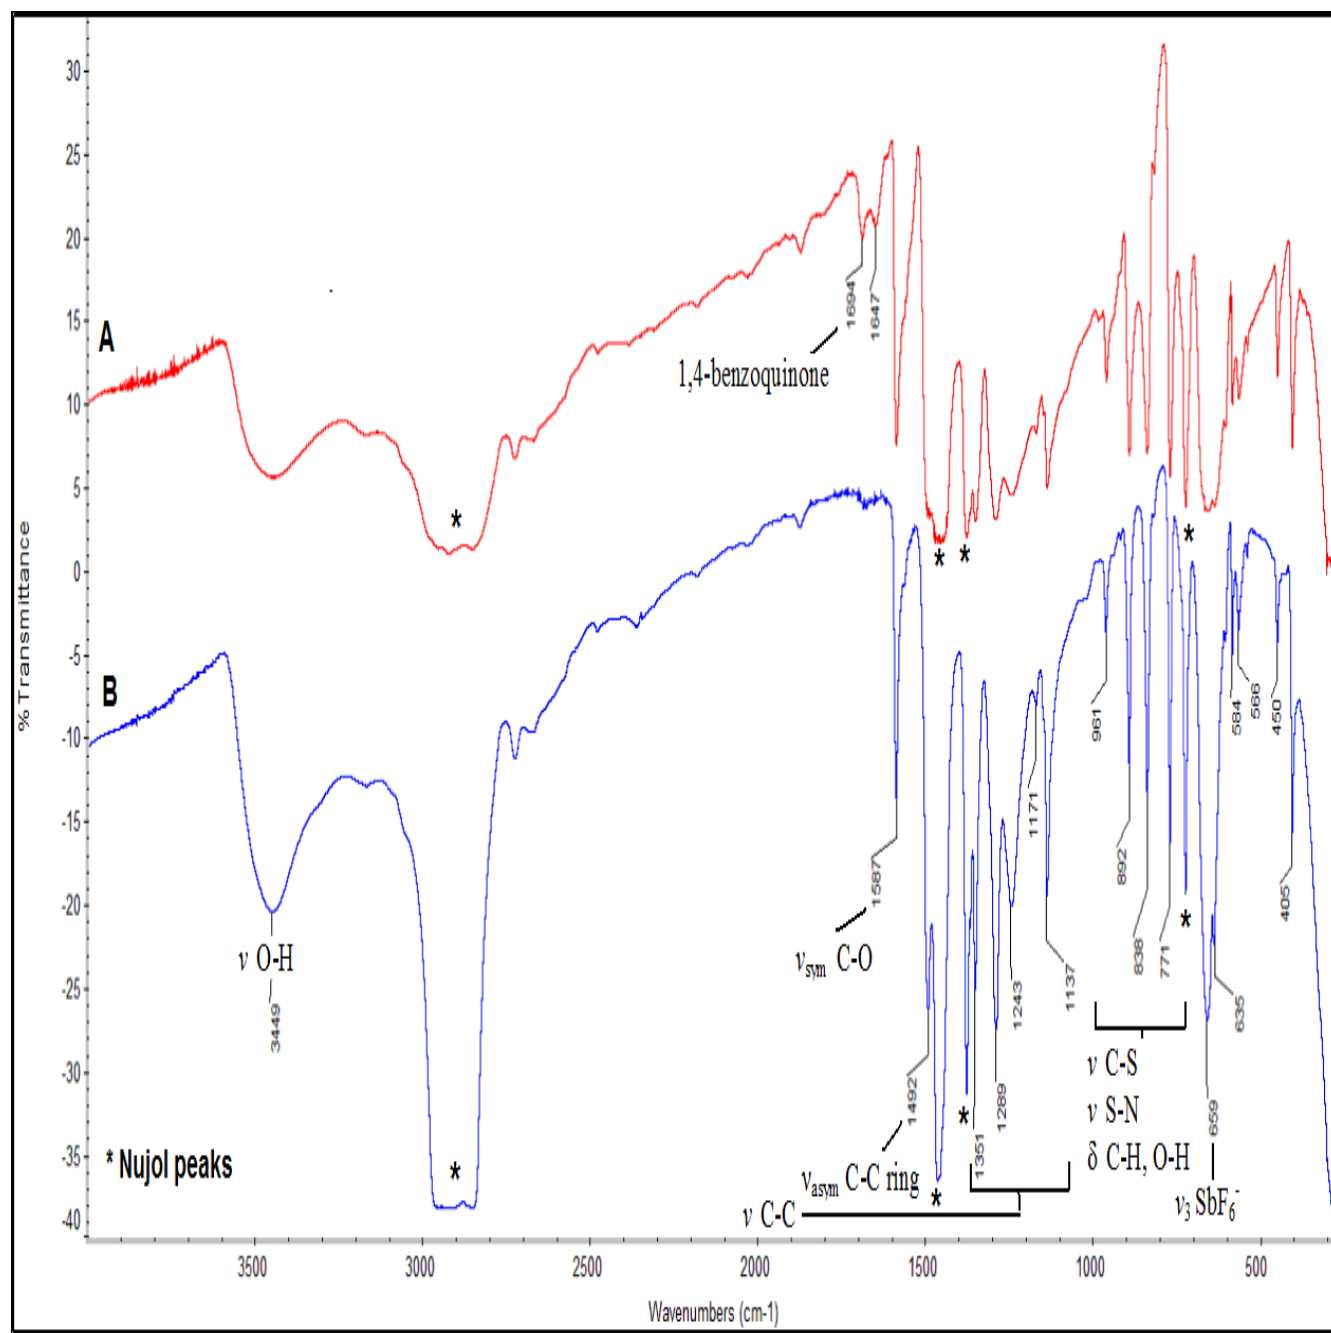

**Figure S3:** FT-IR of a) crude  $1\text{SbF}_6$  and b) purified  $1\text{SbF}_6$  as Nujol mull on KBr plates (32 scans,  $2\text{ cm}^{-1}$  resolution). See Table S9 for comparison of experimental and calculated IR frequencies and tentative assignments (Note the tentative assignments:  $\nu$  = stretch,  $\delta$  = bending, asym. = asymmetric and sym = symmetric):

#### 1.4.2 General procedure for purification of $1\text{MF}_6$ ( $\text{M} = \text{As}, \text{Sb}$ ) prepared according to Equation 1 in Scheme 1

$1\text{MF}_6$  ( $\sim 5\text{ mmol}$ ) was added to bulb A of a vessel of type B (Figure S1b).  $\text{CH}_3\text{CN}$  ( $\sim 1\text{ ml}$  per  $\text{mmol}$  of  $1(\text{MF}_6)$ ) and  $\text{CH}_2\text{Cl}_2$  ( $\sim 5\text{ ml}$  per  $\text{ml}$  of  $\text{CH}_3\text{CN}$ ) were condensed consecutively into bulb A and bulb B, respectively. On warming to ambient temperature a dark blue solution is obtained in bulb A. Typically all of  $1\text{MF}_6$  should be dissolved,

however the more soluble fraction is filtered into bulb B containing  $\text{CH}_2\text{Cl}_2$ . A blue precipitate under a blue-black solution was obtained. After standing for 12 hrs the more soluble fraction was filtered to bulb A. The volatiles were removed from the more soluble fraction under dynamic vacuum.  $\text{CH}_2\text{Cl}_2$  (~ 5 ml) is condensed on to the blue precipitate in bulb B. The blue precipitate was washed with the  $\text{CH}_2\text{Cl}_2$  and the more soluble fraction filtered to bulb A. The volatiles were condensed back to bulb B and the more soluble fraction filtered to bulb A. This was repeated twice more and the volatiles removed under dynamic vacuum. The blue precipitate in bulb B ( $1\text{MF}_6$ , ~ 3.5-4 mmol; ~1.47g of M = Sb and ~ 1.32 g of M = As) is typically recovered in 70-80% yield. The IR was checked as a Nujol mull on KBr plates (See Figure S2b ( $1\text{AsF}_6$ ) and S3b ( $1\text{SbF}_6$ )). See the comparison of experimental and calculated frequencies for  $1\text{SbF}_6$ ,  $1\text{AsF}_6$  and  $1\text{SbF}_6 \cdot \text{C}_6\text{H}_4\text{O}_2$  (Section 1.4.7) in Table S9.

#### Comments:

1) The IR indicate the absence of 1,4-benzoquinone (c.f.  $\nu \text{C}=\text{O}$  is 1685-1650; See Figure S2b and S3b) which remains in the more soluble fraction (e.g.  $\nu \text{C}=\text{O}$  is 1685-1650 Figure S2a and Figure S3a).<sup>16</sup> Furthermore, the removal of 1,4-benzoquinone leads to better resolution of the frequencies assigned to  $1\text{MF}_6$  between 1500-1000  $\text{cm}^{-1}$  (See Figures S2b and S3b).

2) The more soluble fractions are collected and can be further purified as described above. However, we note the presence of substantial quantities of 1,4-benzoquinone leads to the 1:1 lattice inclusion complex  $1\text{SbF}_6 \cdot \text{C}_6\text{H}_4\text{O}_2$  (c.f. Section 1.4.3) which is substantially more soluble in  $\text{CH}_2\text{Cl}_2$  and results in reduced yields (~ 40-50%) of  $1\text{MF}_6$  according to the procedure described above in Section 1.4.2.

#### 1.4.3 *In situ* multinuclear NMR of the reaction of $1\text{SbF}_6$ with excess $\text{SNSSbF}_6$ in $\text{SO}_2$ according to Equation 2-4 in Scheme 1

$1\text{SbF}_6$  (0.422 g, 1.00 mmol) and  $\text{SNSSbF}_6$  (0.718 g, 2.29 mmol) were loaded in to a 10 mm NMR tube (Type D).  $\text{SO}_2$  (5.174 g) was condensed on to the solids and the NMR tube flame sealed. A dark blue solution was obtained on warming to ambient temperature. The multinuclear NMR ( $^1\text{H}$ ,  $^{13}\text{C}$ ,  $^{14}\text{N}$ ) was followed over 36 hours and checked again after 9 and 22 days. After an additional 2 months standing at 25 °C several clear colorless crystals were isolated from the NMR tube and identified as  $3(\text{SbF}_6)_2$  by single crystal X-ray diffraction. The X-ray structure of  $3(\text{SbF}_6)_2$  is given in Figure S7 and the two  $\text{SbF}_6^-$  anions are illustrated in Figure S8 with bond lengths (Å) and angles (°). The experimental and calculated bond lengths (Å) and angles (°) are compared in Table S3 (See Table S1 in Section 1.2 for details on X-ray crystallographic data). The actual multinuclear NMR spectra are given in Figure S4-S6 with assignments (See interpretation below).

**$^1\text{H}$ -NMR:** The initial  $^1\text{H}$ -NMR (Figure S4) showed two singlet resonances assigned to  $\delta(\text{C-H})$  and  $\delta(\text{O-H})$  of  $1^+$  and a 1:1:1 triplet centered at  $\delta$  5.8 of  $\text{NH}_4^+$  and an unassigned 1:1:1 triplet centered at  $\delta$  6.6 and two unassigned singlet resonances at  $\delta$  4.3 and  $\delta$  3.5. After 36 hours, the triplet centered at  $\delta$  6.6 could not be observed, but a new resonance at  $\delta$  7.3, tentatively assigned to  $5^+$  could be observed (See Figure S4 and the corresponding interpretation of  $^{13}\text{C}$ -NMR given below). After 9-22 days no new resonances appear in the  $^1\text{H}$ -NMR (Figure S4).

However, the integration ratio of  $\mathbf{1}^+$  ( $\delta$  7.7-7.0) to  $\text{NH}_4^+$  ( $\delta$  6.2-5.6) is 5.5:1 in the initial  $^1\text{H-NMR}$  which corresponds to  $\sim 15\%$  formation of  $\mathbf{3}^{2+}$  according to Equation 2-4 in Scheme 1. After 36 hrs the ratio of  $\mathbf{1}^+$  to  $\text{NH}_4^+$  is 4:1 ( $\sim 20\%$  formation of  $\mathbf{3}^{2+}$ , Equation 2-4 in Scheme 1), while after 9-22 days the ratio is relatively unchanged at  $\sim 2:1$  corresponding to  $\sim 35\%$  formation of  $\mathbf{3}^{2+}$  (Equation 2-4 in Scheme 1) after three weeks at ambient temperature.

**$^{13}\text{C-NMR}$ :** The initial  $^{13}\text{C-NMR}$  (Figure S5) is consistent with the previously reported  $\mathbf{1}^+$  (c.f.  $\delta$  154.5, 146.3 and 120.2).<sup>15</sup> After 36 hours the coupled  $^{13}\text{C-NMR}$  was obtained and resonances assigned to  $\mathbf{1}^+$  were observed,<sup>15</sup> while three new resonances ( $\delta$  177.3 (C-S), 162.2 (C=O) and 140.2 (C-H,  $J_{\text{C-H}} = 184$  Hz)) are tentatively assigned to  $\mathbf{5}^+$  (Chart 1) based on the calculated  $^{13}\text{C-NMR}$  given in Table S2. The  $^{13}\text{C-NMR}$  remains unchanged after 9-22 days.

**Comment:**  $\mathbf{7}^{2+}$  and  $\mathbf{8}^{2+}$  (Scheme 1) could not be observed in solution at ambient temperature. This suggests the reaction is relatively sluggish at ambient temperature according to Equation 2-4 in Scheme 1.

**$^{14}\text{N-NMR}$ :** The initial  $^{14}\text{N-NMR}$  (Figure S6 shows three assignable resonances to  $\delta$  -12.1 (c.f.  $\delta$  -7.4 for  $\mathbf{1}^+$ ) and comparable to related 1,3,2-dithiazolylum,  $\delta$  -95.9 SNS<sup>+</sup> (c.f.  $\delta$  -95)<sup>17</sup>, and a 1:1:1 triplet centered at  $\delta$  -364.7  $\text{NH}_4^+$ ). The  $^{14}\text{N-NMR}$  after 9-22 days is relatively unchanged. The integration ratio of  $\mathbf{1}^+$  relative to  $\text{NH}_4^+$  were  $\sim 3:1$ , consistent with  $\sim 33\%$  formation of  $\mathbf{3}^{2+}$  according to Equation 2-4 in Scheme 1. This is consistent with the integration of  $\mathbf{1}^+$  relative to  $\text{NH}_4^+$  in the  $^1\text{H-NMR}$  (c.f.  $\sim 35\%$ ). We note the integration of  $\delta$  -12.1 assigned to  $\mathbf{1}^+$  increases from 15.7% to 23.1%, which may be attributed to the presence of 1,4-benzoquinone in  $\mathbf{1SbF}_6$  (See Section 1.4.1 and Comment 1).

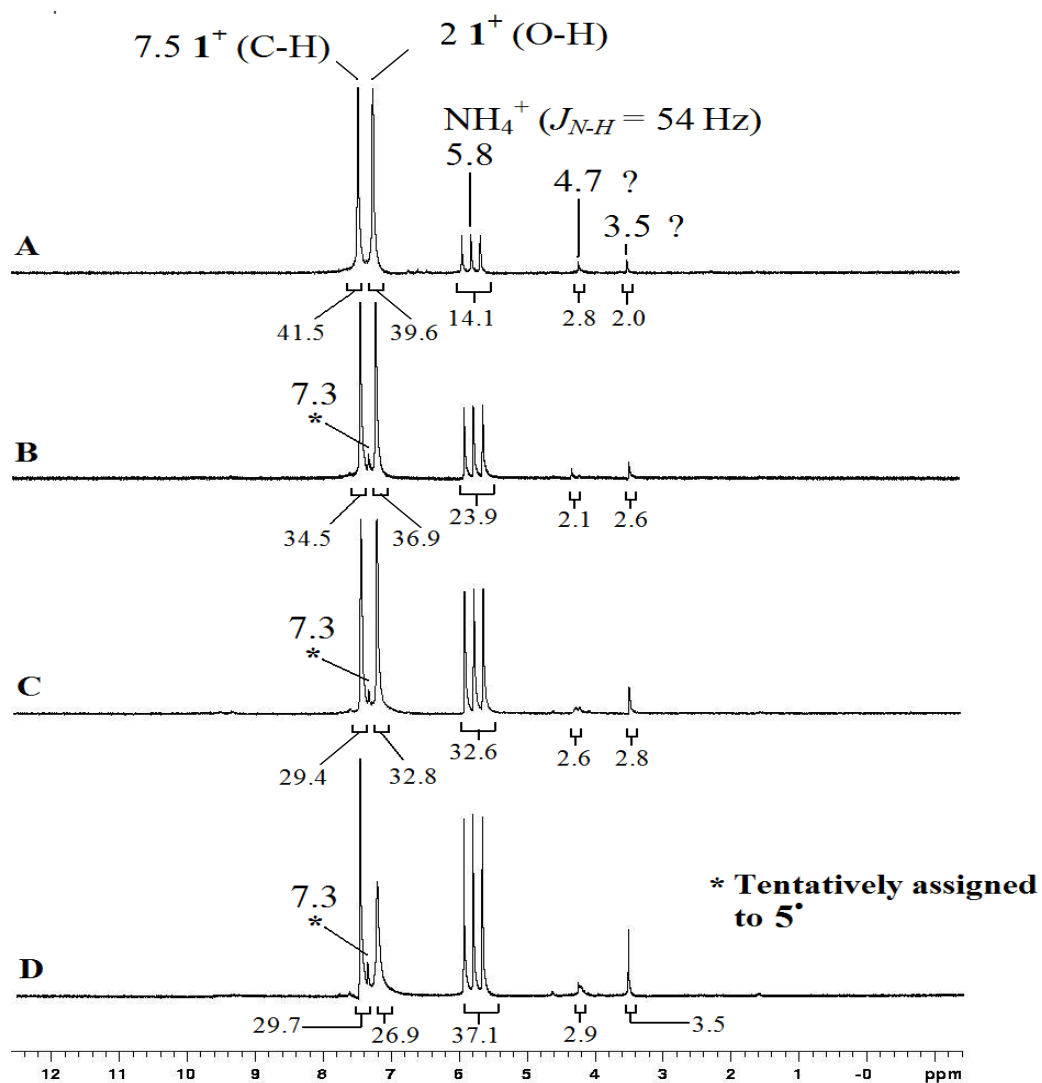

**Figure S4:**  $^1\text{H-NMR}$  of the *in situ* NMR reaction of  $1\text{SbF}_6$  with excess  $\text{SNSSbF}_6$  in liquid  $\text{SO}_2$  at  $25^\circ\text{C}$ . Assignments are made in **A** and integration of each resonance are given below each spectra; **A:** Initial, **B:** After 36 hours, **C:** After 9 days and **D:** After 3 weeks (See Section 1.4.3 for Experimental and Discussion).

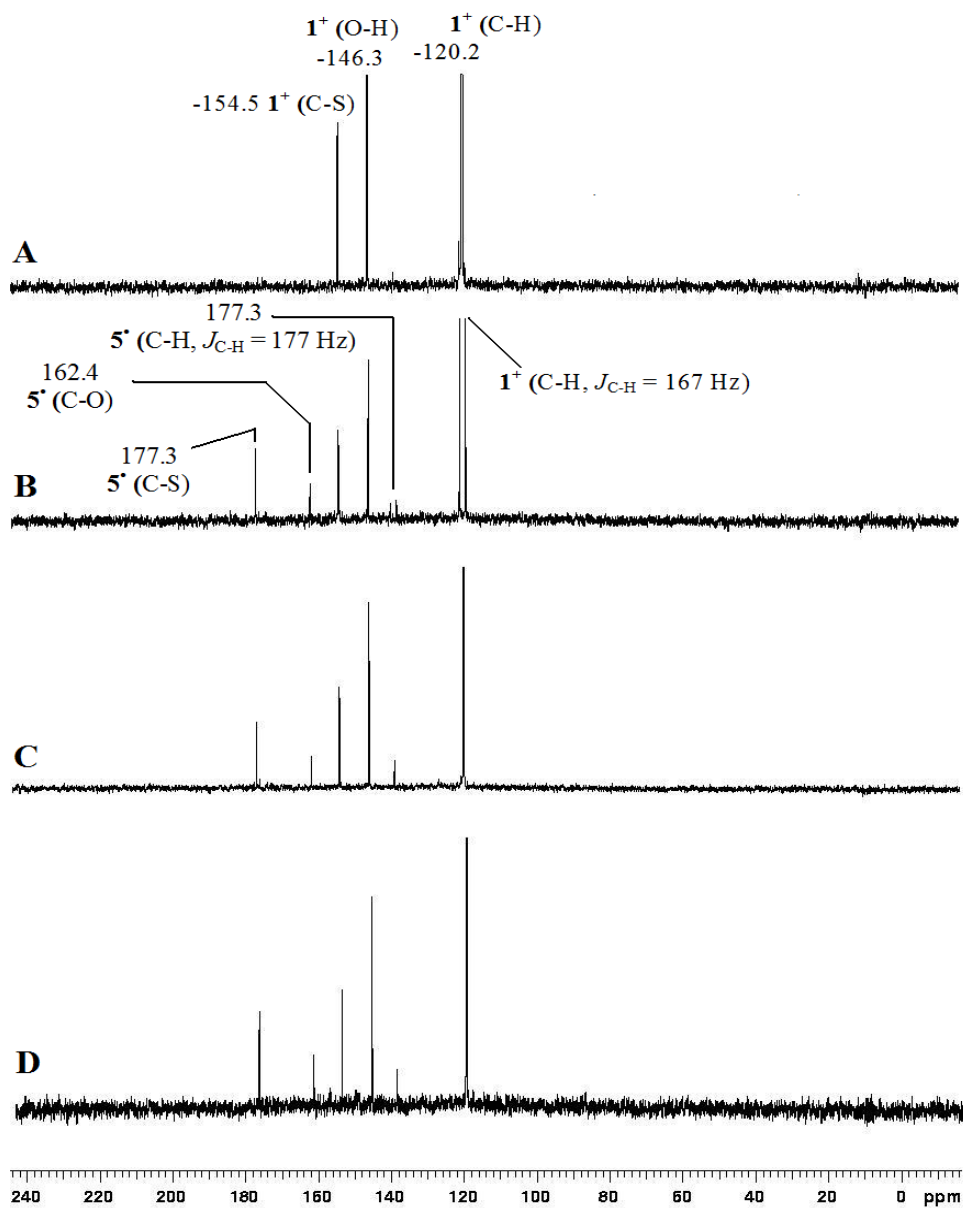

**Figure S5:**  $^{13}\text{C}$ -NMR of the *in situ* NMR reaction of  $1\text{SbF}_6$  with excess  $\text{SNSSbF}_6$  in liquid  $\text{SO}_2$  at  $25^\circ\text{C}$ . Assignments are made in **A** and **B** where **A**: Initial, **B** (coupled  $^1\text{H}$ - $^{13}\text{C}$  NMR): After 36 hours, **C**: After 9 days and **D**: After 3 weeks (See Section 1.4.3 for Experimental and Discussion).

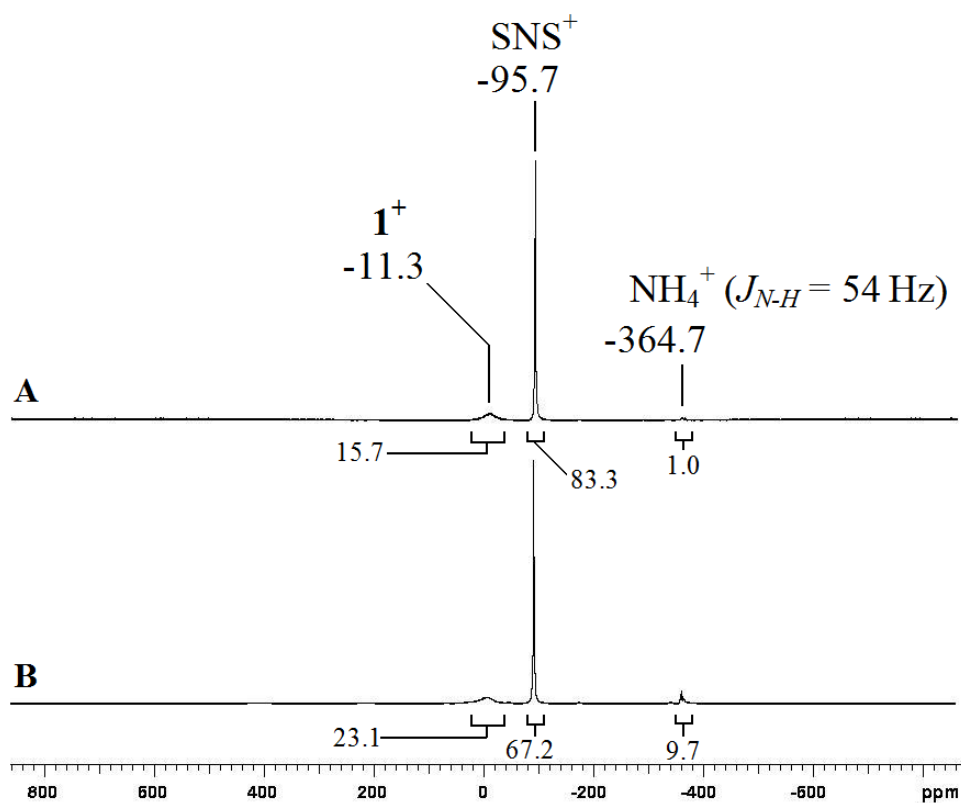

**Figure S6:**  $^{14}\text{N}$ -NMR of the *in situ* NMR reaction of  $1\text{SbF}_6$  with excess  $\text{SNSSbF}_6$  in liquid  $\text{SO}_2$  at  $25^\circ\text{C}$ . Assignments are made in **A** where **A**: Initial, **B** After 22 days (See Section 1.4.3 for Experimental and Discussion).



**Table S2:** Comparison of calculated (B3LYP/6-311++G(d,p)) and experimental  $^{13}\text{C}$  and  $^{14}\text{N}$ -NMR tensors of  $\mathbf{1}^+$ ,  $\mathbf{5}^+$ ,  $\mathbf{5}^\bullet$ ,  $\mathbf{3}^{2+}$ ,  $\mathbf{7}^{2+}$ ,  $\mathbf{8}^{2+}$  and 1,4-benzoquinone ( $\text{C}_6\text{H}_4\text{O}_2$ ) (Atom

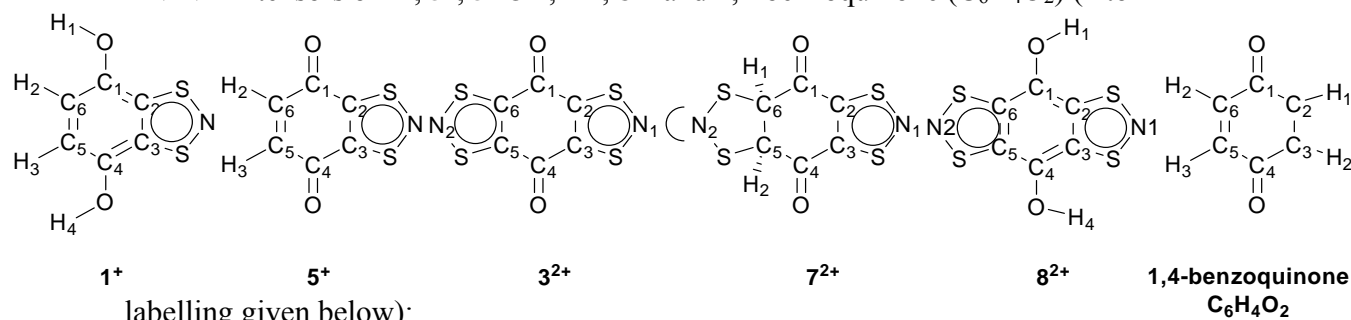

| Compound           | $\mathbf{1}^+$  |                  | $\mathbf{5}^+$  |       | $\mathbf{5}^\bullet$ |       | $\mathbf{3}^{2+}$  |                   | $\mathbf{7}^{2+}$ |      | $\mathbf{8}^{2+}$ |      | 1,4-benzoquinone<br>( $\text{C}_6\text{H}_4\text{O}_2$ ) |       |
|--------------------|-----------------|------------------|-----------------|-------|----------------------|-------|--------------------|-------------------|-------------------|------|-------------------|------|----------------------------------------------------------|-------|
| Molecular Symmetry | $\text{C}_{2v}$ |                  | $\text{C}_{2v}$ |       | $\text{C}_{2v}$      |       | $\text{C}_2$       |                   | $\text{C}_1$      |      | $\text{C}_1$      |      | $\text{D}_{2h}$                                          |       |
| Atom               | Calc.           | Exp.             | Calc.           | Exp.  | Calc.                | Exp.  | Calc. <sup>b</sup> | Exp. <sup>a</sup> | Calc.             | Exp. | Calc.             | Exp. | Calc.                                                    | Exp.  |
| C1                 | 148.5           | 146.5            | 175.1           | 175.1 | 178.2                | 177.3 | 168.1              | 156.0             | 176.7             | NA   | 143.9             | NA   | 166.9                                                    | 188.7 |
| C2                 | 156.9           | 154.8            | 176.6           | 177.2 | 157.5                | 162.2 | 181.0              | 178.6             | 177.5             | NA   | 154.6             | NA   | 136.6                                                    | 136.9 |
| C3                 | 156.9           | 154.8            | 176.6           | 177.2 | 157.5                | 162.2 | 181.0              | 178.6             | 177.9             | NA   | 160.8             | NA   | 136.6                                                    | 136.9 |
| C4                 | 148.5           | 146.5            | 175.1           | 175.1 | 178.2                | 177.3 | 168.1              | 156.0             | 172.6             | NA   | 143.9             | NA   | 166.9                                                    | 188.7 |
| C5                 | 117.9           | 119.5            | 117.4           | 140.0 | 137.6                | 139.3 | 181.0              | 178.6             | 81.9              | NA   | 160.8             | NA   | 136.6                                                    | 136.9 |
| C6                 | 117.9           | 119.5            | 117.4           | 140.0 | 137.6                | 139.3 | 181.0              | 178.6             | 78.2              | NA   | 154.6             | NA   | 136.6                                                    | 136.9 |
| H1                 | 5.62            | 7.52             |                 |       |                      |       |                    |                   |                   |      | 7.28              |      | 6.75                                                     | 6.81  |
| H2                 | 7.44            | 7.96             | 7.66            | 8.25  | 6.73                 | 7.32  |                    |                   | 6.25              | NA   |                   |      | 6.75                                                     | 6.81  |
| H3                 | 7.44            | 7.96             | 7.66            | 8.25  | 6.73                 | 7.32  |                    |                   | 6.44              | NA   |                   |      | 6.75                                                     | 6.81  |
| H4                 | 5.62            | 7.52             |                 |       |                      |       |                    |                   |                   |      | 7.28              |      | 6.75                                                     | 6.81  |
| N1 <sup>c</sup>    | 0 <sup>c</sup>  | -7.4<br>(ref 15) | 7.6             | 1.8   | -                    | NA    | 46                 | NA                | 46.8              | NA   | 66.9              | NA   |                                                          |       |
| N2 <sup>c</sup>    |                 |                  |                 |       |                      |       | 46                 | NA                | 139.6             | NA   | 66.9              | NA   |                                                          |       |

<sup>a</sup> NMR was obtained in  $\text{CD}_3\text{CN}$ . <sup>b</sup> Calculated relative to benzene in  $\text{SO}_2$ . <sup>c</sup> The  $^{14}\text{N}$ -NMR are calculated relative to  $\mathbf{1}^+$  (Used as a reference and has a calculated chemical shift of -223.2 ppm) by the following Equation:  $|\text{Compound} - \mathbf{1}^+ \text{ (c.f. -223.2 ppm)}| = \text{Calculated } ^{14}\text{N-NMR}$ .

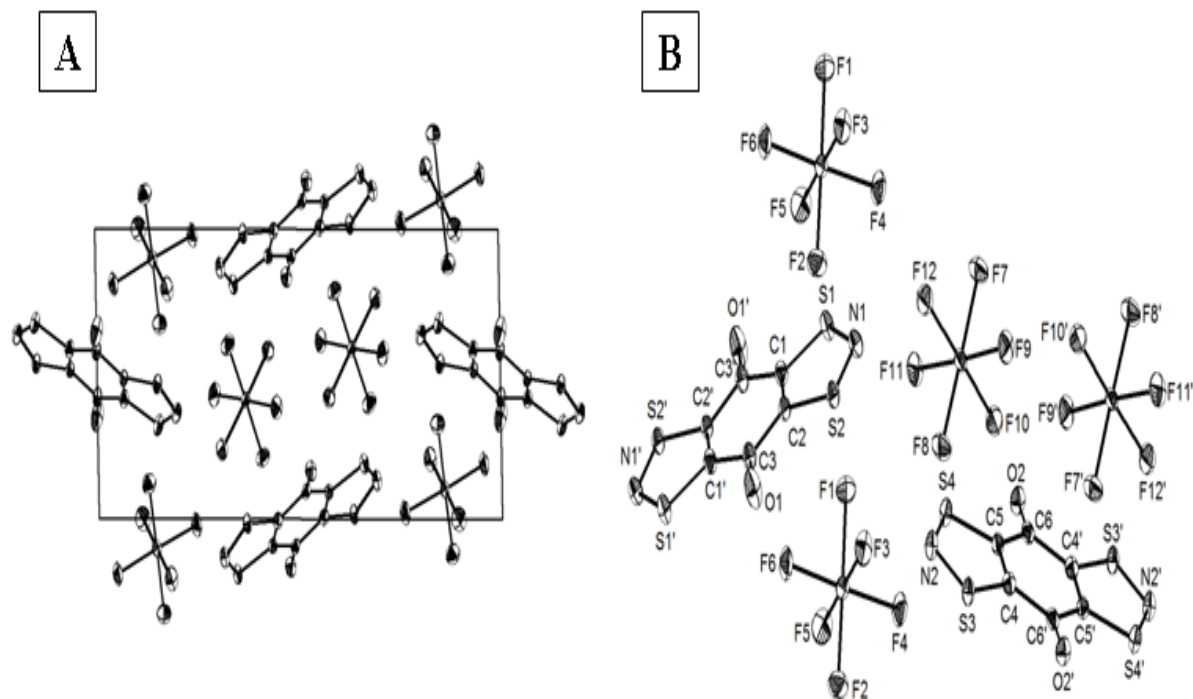

**Figure S7:** The X-ray crystal structure of  $3(\text{SbF}_6)_2$  where a) a view of the unit cell along the b-axis and b) the atom labelling within the asymmetric unit. Thermal ellipsoids are given at 50 % probability. A comparison of experimental and calculated bond distances and angles are given in Table S3.

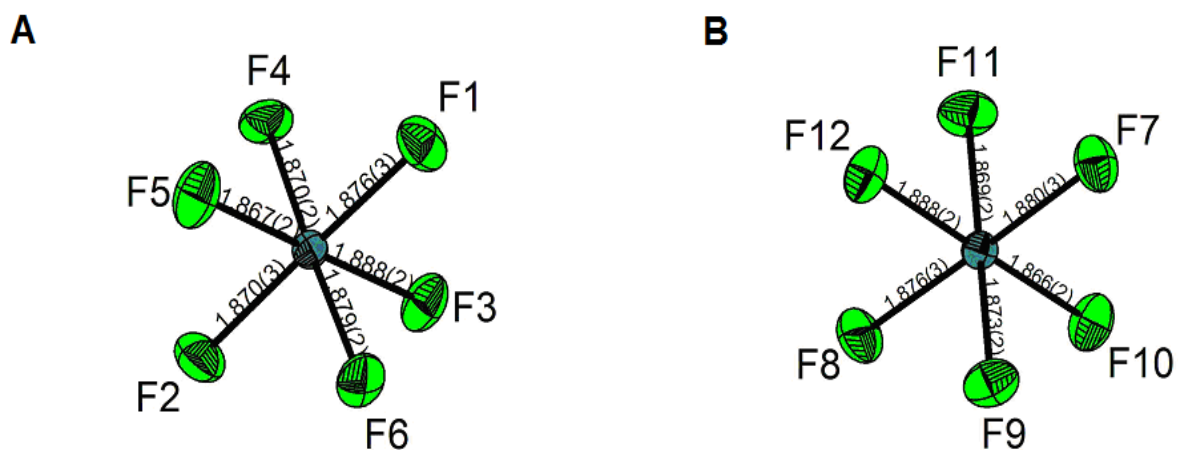

**A:** F1-Sb1-F2 = 179.01 (10), F1-Sb1-F3 = 89.38(10), F1-Sb1-F4 = 91.43(10), F1-Sb1-F5 = 90.34(11), F1-Sb1-F6 = 88.32(10), F2-Sb1-F3 = 90.33(10), F2-Sb1-F4 = 89.52(11), F2-Sb1-F5 = 89.96(11), F2-Sb1-F6 = 90.72(10), F3-Sb1-F4 = 88.87(10), F3-Sb1-F5 = 179.25(10), F3-Sb1-F6 = 88.02(10), F4-Sb1-F5 = 90.44(11), F4-Sb1-F6 = 176.89(9), F5-Sb1-F6 = 92.67(11).

**B:** F7-Sb2-F8 = 177.67(10), F7-Sb2-F9 = 88.51(10), F7-Sb2-F10 = 92.04(10), F7-Sb2-F11 = 90.29(11), F7-Sb2-F12 = 88.41(10), F8-Sb2-F9 = 90.64(10), F8-Sb2-F10 = 90.16(10), F8-Sb2-F11 = 90.50(10), F8-Sb2-F12 = 89.40(10), F9-Sb2-F10 = 92.80(9), F9-Sb2-F11 = 177.97(10), F9-Sb2-F12 = 88.69(10), F10-Sb2-F11 = 88.87(10), F10-Sb2-F12 = 178.45(10), F11-Sb2-F12 = 89.65(10).

**Figure S8:** The two slightly distorted  $\text{SbF}_6^-$  anions **A** and **B** in  $3(\text{SbF}_6)_2$  with bond distances ( $\text{\AA}$ ) and bond angles ( $^\circ$ ).

**Table S3:** Comparison of calculated (B3LYP/6-311++G(d,p)) and experimental bond lengths (Å) and angles (°) of  $3^{2+}$  and  $3^{3+}$  in  $3(\text{AsF}_6)_2 \cdot \text{CH}_3\text{CN}$  and  $3(\text{SbF}_6)_2$  (Atom labelling is given to right):

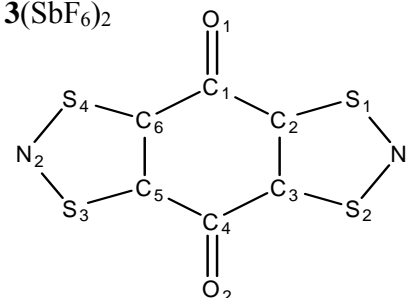

| Bond            | $3(\text{SbF}_6)_2$ |          | $3(\text{AsF}_6)_2 \cdot \text{CH}_3\text{CN}$ | Calc. <sup>a</sup> $3^{2+}$ | Calc. <sup>a</sup> $3^{3+}$ |
|-----------------|---------------------|----------|------------------------------------------------|-----------------------------|-----------------------------|
| Bond Length (Å) |                     |          |                                                |                             |                             |
| O1-C1           | 1.201(6)            | 1.199(5) | 1.203(2)                                       | 1.199                       | 1.233                       |
| O2-C4           | 1.201(6)            | 1.199(5) | 1.203(2)                                       | 1.199                       | 1.233                       |
| C1-C2           | 1.487(5)            | 1.500(5) | 1.493(2)                                       | 1.502                       | 1.459                       |
| C2-C3           | 1.372(5)            | 1.370(5) | 1.371(2)                                       | 1.372                       | 1.400                       |
| C3-C4           | 1.496(5)            | 1.497(4) | 1.491(2)                                       | 1.502                       | 1.459                       |
| C4-C5           | 1.487(5)            | 1.500(5) | 1.493(2)                                       | 1.502                       | 1.459                       |
| C5-C6           | 1.372(5)            | 1.370(5) | 1.371(2)                                       | 1.372                       | 1.400                       |
| C6-C1           | 1.496(5)            | 1.497(4) | 1.491(2)                                       | 1.502                       | 1.459                       |
| C2-S1           | 1.701(3)            | 1.699(3) | 1.694(2)                                       | 1.737 <sup>b</sup>          | 1.732 <sup>b</sup>          |
| S1-N1           | 1.599(4)            | 1.603(4) | 1.599(2)                                       | 1.611                       | 1.616                       |
| S2-N1           | 1.604(4)            | 1.605(3) | 1.599(2)                                       | 1.611                       | 1.616                       |
| C3-S2           | 1.698(3)            | 1.699(3) | 1.701(2)                                       | 1.737 <sup>b</sup>          | 1.732 <sup>b</sup>          |
| C5-S3           | 1.701(3)            | 1.699(3) | 1.694(2)                                       | 1.737 <sup>b</sup>          | 1.732 <sup>b</sup>          |
| S3-N2           | 1.599(4)            | 1.603(4) | 1.599(2)                                       | 1.611                       | 1.616                       |
| S4-N2           | 1.604(4)            | 1.605(3) | 1.599(2)                                       | 1.611                       | 1.616                       |
| C6-S4           | 1.698(3)            | 1.699(3) | 1.701(2)                                       | 1.737 <sup>b</sup>          | 1.732 <sup>b</sup>          |
| Bond Angles (°) |                     |          |                                                |                             |                             |
| O1-C1-C2        | 123.8(3)            | 123.6(3) | 122.25(3)                                      | 123.21                      | 123.21                      |
| O1-C1-C6        | 122.7(3)            | 123.5(3) | 124.25(2)                                      | 123.21                      | 123.21                      |
| O2-C4-C3        | 122.7(3)            | 123.5(3) | 124.25(2)                                      | 123.21                      | 123.21                      |
| O2-C4-C5        | 123.8(3)            | 123.6(3) | 122.25(3)                                      | 123.21                      | 123.21                      |
| C1-C2-C3        | 123.1(3)            | 123.6(3) | 123.78(3)                                      | 123.20                      | 123.20                      |
| C2-C3-C4        | 123.3(3)            | 122.6(2) | 122.63(2)                                      | 123.20                      | 123.20                      |
| C3-C4-C5        | 113.5(3)            | 112.9(3) | 113.46(3)                                      | 113.58                      | 113.58                      |
| C4-C5-C6        | 123.1(3)            | 123.6(3) | 123.78(3)                                      | 123.20                      | 123.20                      |
| C5-C6-C1        | 123.3(3)            | 122.6(2) | 122.64(2)                                      | 123.20                      | 123.20                      |
| C6-C1-C2        | 113.5(3)            | 112.9(3) | 133.46(3)                                      | 113.58                      | 113.58                      |
| C1-C2-S1        | 123.5(2)            | 122.6(2) | 122.61(3)                                      | 123.11                      | 123.11                      |
| C2-S1-N1        | 98.3(2)             | 98.5(2)  | 98.35(3)                                       | 97.09                       | 97.09                       |
| C2-C3-S2        | 113.6(3)            | 113.8(3) | 113.60(2)                                      | 113.98                      | 113.68                      |
| C3-S2-N1        | 98.1(2)             | 98.1(2)  | 98.35(3)                                       | 97.09                       | 97.09                       |
| C3-C2-S1        | 113.3(2)            | 113.2(2) | 113.60(2)                                      | 113.68                      | 113.68                      |
| S1-N1-S2        | 116.6(2)            | 116.3(2) | 116.55(2)                                      | 118.45                      | 118.45                      |
| C4-C3-S2        | 123.0(2)            | 123.2(2) | 123.99(3)                                      | 123.11                      | 123.11                      |
| C4-C5-S3        | 123.0(2)            | 123.2(2) | 123.99(3)                                      | 123.11                      | 123.11                      |
| C5-S3-N2        | 98.3(2)             | 98.5(2)  | 98.35(3)                                       | 97.09                       | 97.09                       |
| C5-C6-S4        | 113.6(3)            | 113.8(3) | 113.60(2)                                      | 113.98                      | 113.68                      |
| C6-S4-N2        | 98.1(2)             | 98.1(2)  | 98.35(3)                                       | 97.09                       | 97.09                       |
| C6-C5-S3        | 113.3(2)            | 113.2(2) | 113.60(2)                                      | 113.68                      | 113.68                      |
| S3-N2-S4        | 116.6(2)            | 116.3(2) | 116.55(2)                                      | 118.45                      | 118.45                      |
| C1-C6-S4        | 123.5(2)            | 122.6(2) | 122.61(3)                                      | 123.11                      | 123.11                      |

<sup>a</sup> Gas phase structures calculated using the B3LYP method and 6-311++G(d,p) basis set.

<sup>b</sup> DFT methods tend to over estimate the C-S bond length in related thiazyl compounds.<sup>18</sup>

#### 1.4.4 Reaction of $1\text{SbF}_6$ with excess $\text{SNSSbF}_6$ in $\text{SO}_2$ according to Equation 2-4 in Scheme 1

$1(\text{SbF}_6)$  (2.122 g, 5.03 mmol) and  $\text{SNSSbF}_6$  (3.816 g, 12.16 mmol) were added into bulb A of a vessel of Type A (Figure S1a) with a Teflon coated stir bar.  $\text{SO}_2$  (57.732 g, ~ 40 ml) was condensed into bulb A. A dark blue solution was obtained on warming to ambient temperature and was stirred continuously. After 1 week a blue solution over a small quantity of black insoluble was observed. A trace of  $\text{Br}_2$  (0.089 g, 1.11 mmol) was condensed into the mixture and warm to ambient temperature. The condenser was cooled with running water and the reaction mixture gently refluxed with an external electric heating mantle at ~ 50-60 °C (Note the valve to bulb B was closed during the reflux). After refluxing for 1 week, a blue-black solution over a grey insoluble is obtained. The solution was allowed to cool to ambient temperature and the more soluble fraction filtered to bulb B. The volatiles (~ 10 ml) were condensed back to bulb A and the more soluble fraction filtered into bulb B. This was repeated until the more soluble fraction was colorless. The volatiles were removed under dynamic vacuum and the condenser rinsed with acetone and dried with a stream of air before collecting the solids in the drybox. The grey insoluble in bulb A (3.227 g, 81 % yield of  $3(\text{SbF}_6)_2$  based on  $1\text{SbF}_6$  and Equation 2-4 in Scheme 1) and the more soluble fraction from bulb B (2.637 g) were collected. The IR of the grey insoluble as a Nujol mull was obtained on KBr plates and were consistent with  $3(\text{SbF}_6)_2$  (Figure S9a) based on comparison to the calculated IR frequencies and intensities in Table S4. The elemental analysis of the grey insoluble: Found C 7.18%, N 3.94%, S 16.85%, F 30.73%, Sb 34.9%; Calculated based on  $1/8 \text{S}_8$  in Equation 2-4 in Scheme 1: C 7.55%, N 4.03%, S 16.80%, F 32.85%, Sb 35.09% (See Equation 6b below where  $\text{SNSAsF}_6$  oxidizes sodium dithionite ( $\text{Na}_2\text{S}_2\text{O}_4$ )). Calculated based on  $3(\text{SbF}_6)_2$ : C 9.85%, N 3.83%, S 17.53%, F 31.15%, Sb 33.27%;

#### Comments:

1) We note the satisfactory agreement of the elemental analysis of the grey insoluble and the reasonable agreement with Equation 2-4 in Scheme 1 and only  $1/8 \text{S}_8$ . While this supports the proposed reaction scheme given in Scheme 1 (above) and is supported by the gas phase and solution phase ( $\text{SO}_2$ ) calculations (Table S5). We recognized the possibility that the oxidative dehydrogenation of  $\text{SNS}^+$  according to Equation 2-4 in Scheme 1 is more complicated. We note the reaction of  $\text{SNS}^+$  with a range of reducing agents has led to different identified products as outlined in Equation 6a-c<sup>19</sup> which may account for the deficit of  $\text{S}_8$  (e.g. Equation 6b) determined by elemental analysis according to Equation 2-4 in Scheme 1 (above).

#### Equation 6:

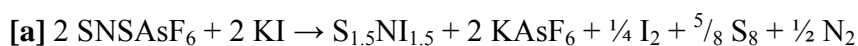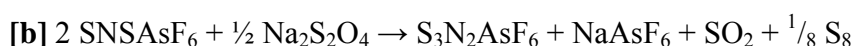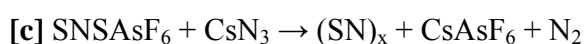

However, we note that there is no evidence of the formation of  $\text{SN}_x$  (Equation 6c) by qualitative EDX microanalysis by scanning electron microscopy (SEM) (Figure S11) which shows no indication of the presence of N, but the formation of  $\text{S}_8$  (c.f. Equation 2-4 in Scheme 1) has been confirmed by Raman microscopy (Figure S10) and EDX microanalysis by scanning electron microscopy (SEM) as shown in Figure S11.

**Overall summary of Equation 2-4 in Scheme 1:**

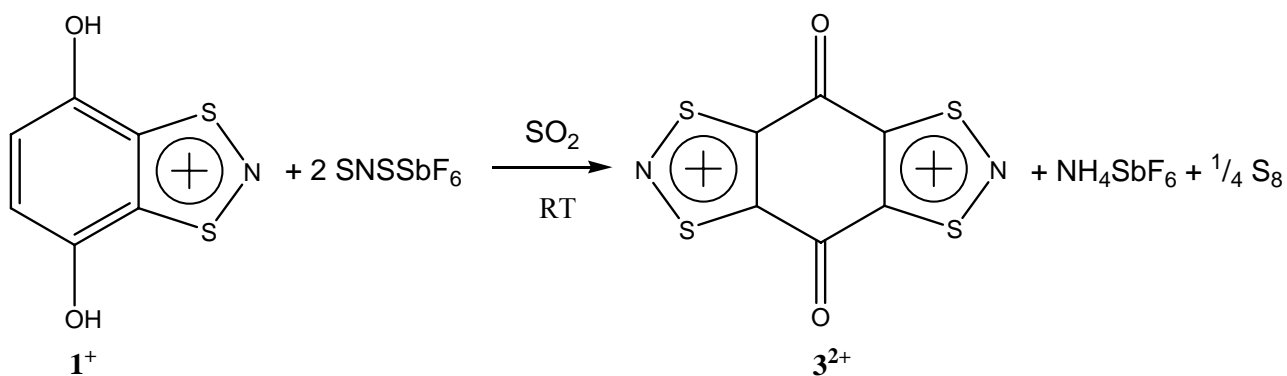

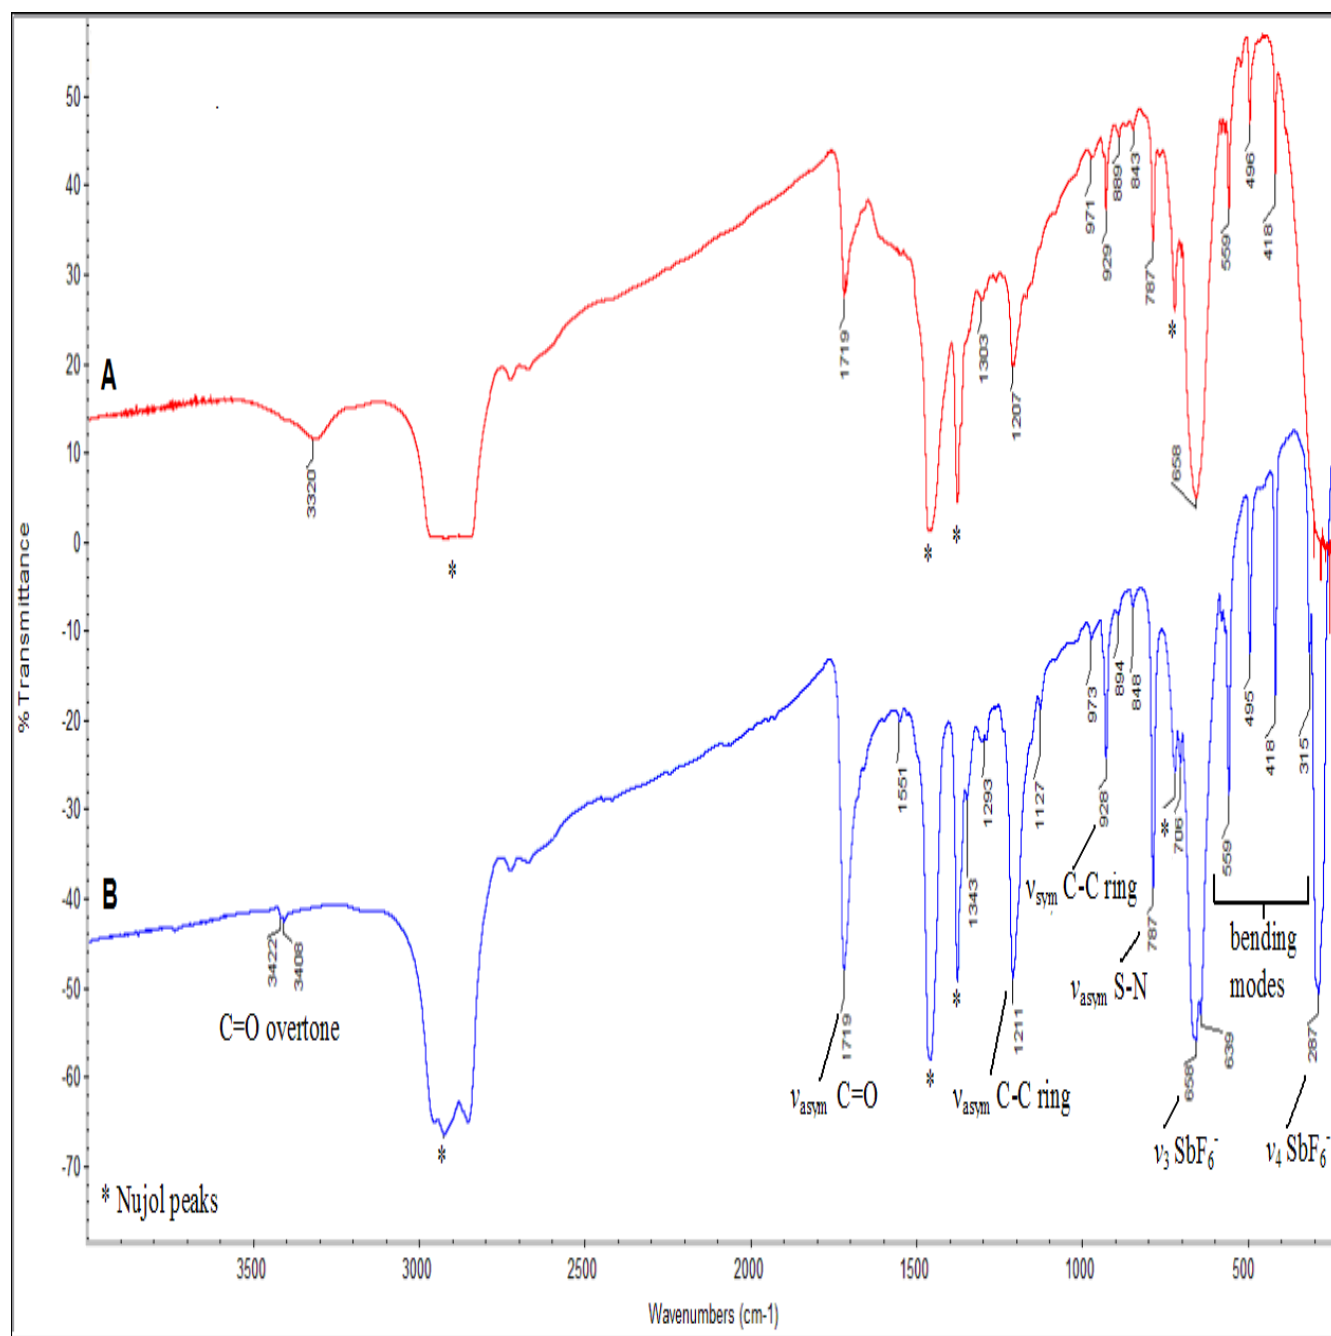

**Figure S9:** The FT-IR of a) crude  $3(\text{SbF}_6)_2$  on KBr plates and b) purified  $3(\text{SbF}_6)_2$  on CsI plates (32 scans,  $2\text{ cm}^{-1}$  resolution). See Table S4 for comparison of experimental and calculated IR frequencies and tentative assignments (Note the tentative assignments:  $\nu$  = stretch,  $\delta$  = bending, asym. = asymmetric and sym = symmetric):

**Table S4:** Comparison of calculated (B3LYP/6-311++G(d,p)) and experimental IR frequencies for  $3^{2+}$  and  $3^{3+}$ .

| $3(\text{SbF}_6)_2$       |                                                  |                                                  | Tentative Assignments <sup>a</sup>                        | $3\text{SbF}_6$          |                             | Tentative Assignments <sup>a</sup>                              |
|---------------------------|--------------------------------------------------|--------------------------------------------------|-----------------------------------------------------------|--------------------------|-----------------------------|-----------------------------------------------------------------|
| IR/Raman (Calc.)          | IR <sup>b</sup><br>$3(\text{SbF}_6)_2$<br>(Obs.) | IR <sup>c</sup><br>$3(\text{AsF}_6)_2$<br>(Obs.) |                                                           | IR/Raman (Calc.)         | IR <sup>b,e</sup><br>(Obs.) |                                                                 |
|                           | 3315s,br                                         | 3325s,br                                         | $\text{NH}_4^+$                                           |                          |                             |                                                                 |
| 1723 (63/0) <sub>d</sub>  | 1718s                                            | 1718s                                            | $\nu_{\text{asym}} \text{C}=\text{O}$                     |                          | 1720s                       | $\nu_{\text{asym}} \text{C}=\text{O}$ of $3^{2+}$               |
| 1715 (0/100) <sub>d</sub> |                                                  |                                                  |                                                           |                          |                             |                                                                 |
|                           |                                                  |                                                  |                                                           | 1618 (0/27) <sub>d</sub> |                             |                                                                 |
|                           |                                                  |                                                  |                                                           | 1526 (88/0) <sub>d</sub> | 1595m                       | $\nu_{\text{sym}} \text{C}-\text{O}$ of $3^{3+}$                |
| 1500 (0/60)               |                                                  |                                                  |                                                           | 1438 (0/14)              |                             |                                                                 |
| 1476 (9/0)                | 1306w                                            | 1305w                                            |                                                           |                          |                             |                                                                 |
|                           |                                                  |                                                  |                                                           | 1340 (44/0)              | 1313s                       | $\nu_{\text{asym}} \text{C}=\text{C}$ of $3^{3+}$               |
|                           |                                                  |                                                  |                                                           | 1337 (0/100)             |                             |                                                                 |
| 1282 (0/8)                | 1265vw                                           |                                                  |                                                           |                          |                             |                                                                 |
|                           |                                                  | 1258w                                            |                                                           |                          |                             |                                                                 |
| 1180 (100/0)              | 1208s                                            | 1206s                                            | Asym. $\nu\text{C}-\text{C} + \nu\text{C}-\text{S}$       | 1139 (2/0)               | 1208s                       | Asym. $\nu\text{C}-\text{C} + \nu\text{C}-\text{S}$ of $3^{2+}$ |
|                           | 1175w,sh                                         | 1173w,sh                                         |                                                           |                          |                             |                                                                 |
| 1172 (6/0)                | 1151w,sh                                         |                                                  | $\nu_{\text{asym}} \text{C}-\text{C}$ ring                |                          | 1151m                       | $\nu_{\text{asym}} \text{C}-\text{C}$ ring of $3^{2+}$          |
|                           |                                                  |                                                  |                                                           | 1092 (49/0)              |                             |                                                                 |
|                           | 1078w,sh                                         | 1079w,br                                         |                                                           |                          |                             |                                                                 |
|                           | 1019w                                            | 1026w                                            |                                                           |                          |                             |                                                                 |
| 984 (0/28)                | 972w                                             | 970w                                             | $\nu_{\text{sym}} \text{C}-\text{S}$                      | 952 (1/0)                | 971w                        | $\nu_{\text{sym}} \text{C}-\text{S}$ of $3^{2+}$                |
| 953 (0/7)                 | 930m                                             | 929m                                             | Sym. $\nu\text{C}-\text{C} + \nu\text{C}-\text{S}$        | 940 (0/21)               |                             |                                                                 |
| 951 (1/0)                 |                                                  |                                                  |                                                           |                          |                             |                                                                 |
| 929 (4/0)                 | 891w                                             | 892w                                             |                                                           |                          | 929m                        |                                                                 |
|                           |                                                  |                                                  |                                                           |                          | 894m                        |                                                                 |
| 844 (0/6)                 | 841w                                             | 847w                                             |                                                           |                          |                             |                                                                 |
|                           |                                                  |                                                  |                                                           | 867 (0/17)               |                             |                                                                 |
|                           |                                                  |                                                  |                                                           | 808 (100/0)              |                             |                                                                 |
|                           |                                                  |                                                  |                                                           | 776 (6/0)                |                             |                                                                 |
| 776 (22/0)                | 787m                                             | 789m                                             | $\nu_{\text{asym}} \text{S}-\text{N}$                     | 762 (0/6)                | 787m                        | $\nu_{\text{asym}} \text{S}-\text{N}$ of $3^{2+}$               |
|                           |                                                  |                                                  |                                                           |                          | 772m                        |                                                                 |
|                           |                                                  |                                                  |                                                           | 748 (0/1)                |                             |                                                                 |
| 743 (0/1)                 |                                                  |                                                  |                                                           |                          |                             |                                                                 |
| 742 (0/17)                |                                                  |                                                  |                                                           |                          |                             |                                                                 |
| 722 (4/0)                 |                                                  |                                                  |                                                           |                          |                             |                                                                 |
| 711 (0/3)                 |                                                  |                                                  |                                                           | 707 (3/0)                |                             |                                                                 |
| 677 (3/0)                 |                                                  |                                                  |                                                           | 689 (1/0)                |                             |                                                                 |
|                           |                                                  | 696vs,br                                         | $\nu_3 \text{AsF}_6^-$                                    |                          |                             |                                                                 |
|                           |                                                  | 661m,sh                                          | $\nu_{\text{asym}} \text{C}-\text{S}$                     |                          |                             |                                                                 |
|                           | 660vs,br                                         |                                                  | $\nu_3 \text{SbF}_6^-$                                    |                          | 657vs                       | $\nu_3 \text{SbF}_6^-$                                          |
|                           |                                                  |                                                  |                                                           | 640 (0/1)                |                             |                                                                 |
| 587 (0/20)                |                                                  |                                                  |                                                           | 585 (0/1)                |                             |                                                                 |
| 576 (8/0)                 | 559m                                             | 561m                                             | $\delta_{\text{asym}} \text{S}-\text{N}-\text{S}$ bending | 573 (2/0)                |                             |                                                                 |
|                           |                                                  |                                                  |                                                           |                          | 559w                        | $\delta_{\text{asym}} \text{S}-\text{N}-\text{S}$ bending of    |



|           |       |      |                                           |            |      |                                                                    |
|-----------|-------|------|-------------------------------------------|------------|------|--------------------------------------------------------------------|
|           |       |      |                                           |            |      | <b>3<sup>2+</sup></b>                                              |
|           |       |      |                                           | 487 (0/1)  |      |                                                                    |
| 484 (2/0) | 494m  | 496m | Inp. Ring bending                         |            | 496m | Inp. Ring bending of <b>3<sup>2+</sup></b>                         |
| 471 (0/6) |       |      |                                           |            |      |                                                                    |
| 445 (1/0) |       |      |                                           | 447 (6/0)  |      |                                                                    |
| 437 (0/1) |       |      |                                           | 429 (0/1)  |      |                                                                    |
| 425 (6/0) | 417m  |      | Opp. $\delta_{\text{asym}}$ S-N-S bending |            | 418m | Opp. $\delta_{\text{asym}}$ S-N-S bending of <b>3<sup>2+</sup></b> |
| 410 (0/1) |       |      |                                           | 414 (3/0)  |      |                                                                    |
|           |       | 396s | $\nu_4 \text{AsF}_6^-$                    |            |      |                                                                    |
| 354 (0/4) |       |      |                                           |            |      |                                                                    |
|           |       |      |                                           | 352 (0/14) |      |                                                                    |
|           |       |      |                                           | 343 (0/1)  |      |                                                                    |
| 314 (5/0) |       |      |                                           |            |      |                                                                    |
|           | 288vs |      | $\nu_4 \text{SbF}_6^-$                    |            |      |                                                                    |
|           |       |      |                                           | 298 (2/0)  |      |                                                                    |
|           |       |      |                                           | 291 (0/1)  |      |                                                                    |
| 271 (0/3) |       |      |                                           |            |      |                                                                    |
| 237(0/1)  |       |      |                                           | 249 (0/1)  |      |                                                                    |
| 204 (0/1) |       |      |                                           | 195 (0/1)  |      |                                                                    |
| 170 (1/0) |       |      |                                           | 175 (1/0)  |      |                                                                    |
| 143 (2/0) |       |      |                                           | 149 (1/0)  |      |                                                                    |
| 102 (0/1) |       |      |                                           | 134 (0/1)  |      |                                                                    |
| 53 (1/0)  |       |      |                                           | 64 (1/0)   |      |                                                                    |

<sup>a</sup> Assignment where made by visualization in Chemcraft <sup>14</sup> ( $\nu$  = stretching,  $\delta$  = bending, Asym. = asymmetric, Sym. = symmetric, Inp. = in-plane, Opp = out-of-plane). <sup>b</sup> See Figure S9b for FT-IR spectra. <sup>c</sup> See Figure S14 for FT-IR spectra <sup>d</sup> The  $\text{-C=O}$  stretching frequencies are scaled by 0.965. <sup>e</sup> See Figure S26b for FT-IR spectra. <sup>f</sup> In Figure S14 we note the presence of **3<sup>2+</sup>** in **3<sup>3+</sup>** prepared according to Equation 7 (Section 1.4.6).

**Table S5:** Calculated gas phase (B3LYP/6-311++G(d,p) and SO<sub>2</sub> solution (PBE1PBE/6-311G(d) energetics

| Compound <sup>a</sup>                                                      | Gas Phase<br>(B3LYP/6-311++G(d,p))   | Solution<br>PBE1PBE/6-311G(d) |                                    | Thermal<br>Correction to<br>Gibbs Free<br>Energies <sup>b</sup> | Gas phase<br>Enthalpy<br>( $\Delta H$ ) <sup>c</sup><br>KJ mol <sup>-1</sup> | Solution<br>Enthalpy<br>( $\Delta H$ ) <sup>c</sup><br>KJ mol <sup>-1</sup> | Solution<br>Gibbs free<br>energies<br>( $\Delta G$ ) <sup>c</sup><br>KJ mol <sup>-1</sup> |
|----------------------------------------------------------------------------|--------------------------------------|-------------------------------|------------------------------------|-----------------------------------------------------------------|------------------------------------------------------------------------------|-----------------------------------------------------------------------------|-------------------------------------------------------------------------------------------|
|                                                                            | Zero point<br>energies<br>(Hartrees) | Enthalpies<br>(Hartrees)      | Gibbs free<br>energy<br>(Hartrees) |                                                                 |                                                                              |                                                                             |                                                                                           |
| <b>1,4-<br/>benzoquinone<br/>(C<sub>6</sub>H<sub>4</sub>O<sub>2</sub>)</b> | -381.477430                          | -381.116855                   | -381.102190                        | 0.055115                                                        |                                                                              |                                                                             |                                                                                           |
| <b>A (Scheme 1)</b>                                                        |                                      | -<br>1231.718595              | -1231.711756                       |                                                                 | -48<br>(Eqn. 1a) <sup>a</sup>                                                | -82<br>(Eqn. 1a) <sup>a</sup>                                               | -47<br>(Eqn. 1a) <sup>a</sup>                                                             |
| <b>1<sup>+</sup></b>                                                       | -1232.401809                         | -<br>1231.768822              | -1231.751612                       | 0.059034                                                        | -170<br>(Eqn. 1b) <sup>a</sup>                                               | -153<br>(Eqn. 1b) <sup>a</sup>                                              | -149<br>(Eqn. 1b) <sup>a</sup>                                                            |
| <b>5<sup>+</sup></b>                                                       | -1231.158945                         | -<br>1230.514981              | -1230.497539                       | 0.035719                                                        | 24<br>(Eqn. 2) <sup>a</sup>                                                  | -15<br>(Eqn. 2) <sup>a</sup>                                                | -18<br>(Eqn. 2) <sup>a</sup>                                                              |
| <b>7<sup>2+</sup></b>                                                      | -2081.888457                         | -<br>2081.083783              | -2081.063434                       | 0.038937                                                        | 293<br>(Eqn. 3a) <sup>a</sup>                                                | -17<br>(Eqn. 3a) <sup>a</sup>                                               | 21<br>(Eqn. 3a) <sup>a</sup>                                                              |
| <b>8<sup>2+</sup></b>                                                      | -2081.941352                         | -<br>2081.127652              | -2081.107467                       | 0.039454                                                        | -139<br>(Eqn. 3b) <sup>a</sup>                                               | -115<br>(Eqn.<br>3b) <sup>a</sup>                                           | -114<br>(Eqn. 3b) <sup>a</sup>                                                            |
| <b>3<sup>2+</sup></b>                                                      | -2080.705992                         | -<br>2079.885445              | -2079.865120                       | 0.018510                                                        | 4<br>(Eqn. 4) <sup>a</sup>                                                   | -46<br>(Eqn. 4) <sup>a</sup>                                                | -43<br>(Eqn. 4) <sup>a</sup>                                                              |
| <b>SNS<sup>+</sup></b>                                                     | -850.841279                          | -850.562501                   | -850.554757                        | -0.015962                                                       |                                                                              |                                                                             |                                                                                           |
| <b>NH<sub>4</sub><sup>+</sup></b>                                          | -56.870873                           | -56.953287                    | -56.946742                         | 0.029829                                                        |                                                                              |                                                                             |                                                                                           |
| <b>S<sub>8</sub></b>                                                       | -3185.751246                         | -<br>3184.514546              | -3184.496332                       | -0.027034                                                       |                                                                              |                                                                             |                                                                                           |

<sup>a</sup> Based on Equation 1-4 in Scheme 1. <sup>b</sup> Thermal correction from gas phase calculation applied to solution Gibbs free energies. <sup>c</sup> Calculated enthalpies and Gibbs free energies are based on both Scheme 1 and the following proposed reaction: SNS<sup>+</sup> + 4 H<sup>+</sup> + 4 e<sup>-</sup> → NH<sub>4</sub><sup>+</sup> + 1/4 S<sub>8</sub> (Based on Equation 2 and 4 in Scheme 1).

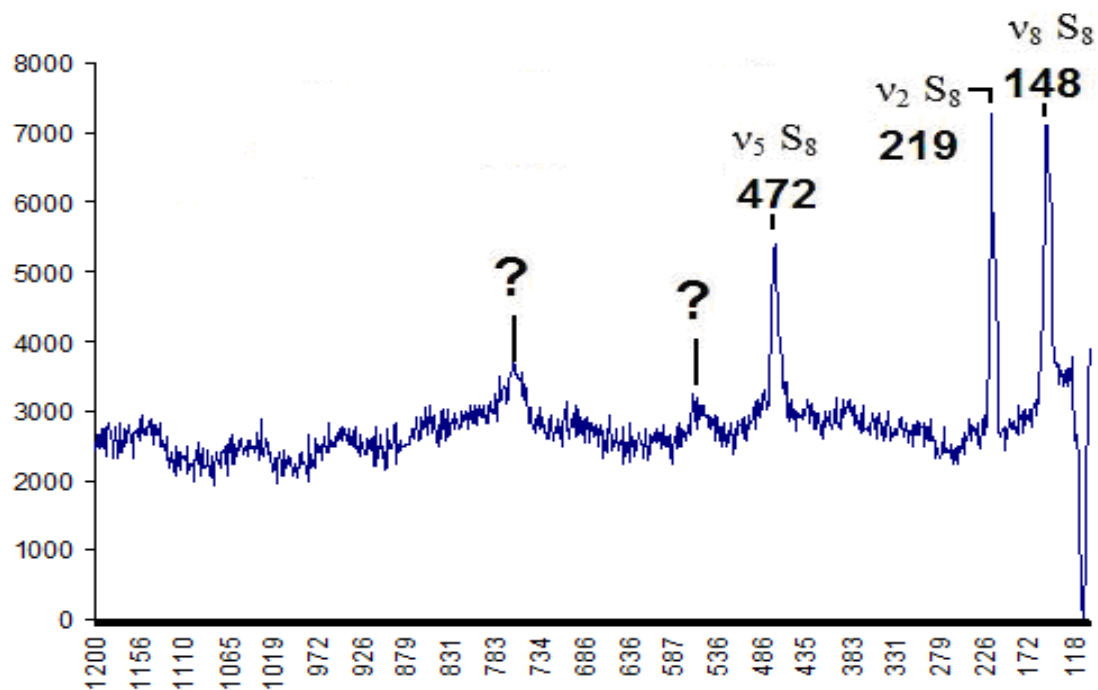

**Figure S10:** The Raman microscopy (785 nm) of insoluble solid obtained in Section 1.4.5 prepared according to Equation 2-4 in Scheme 1.

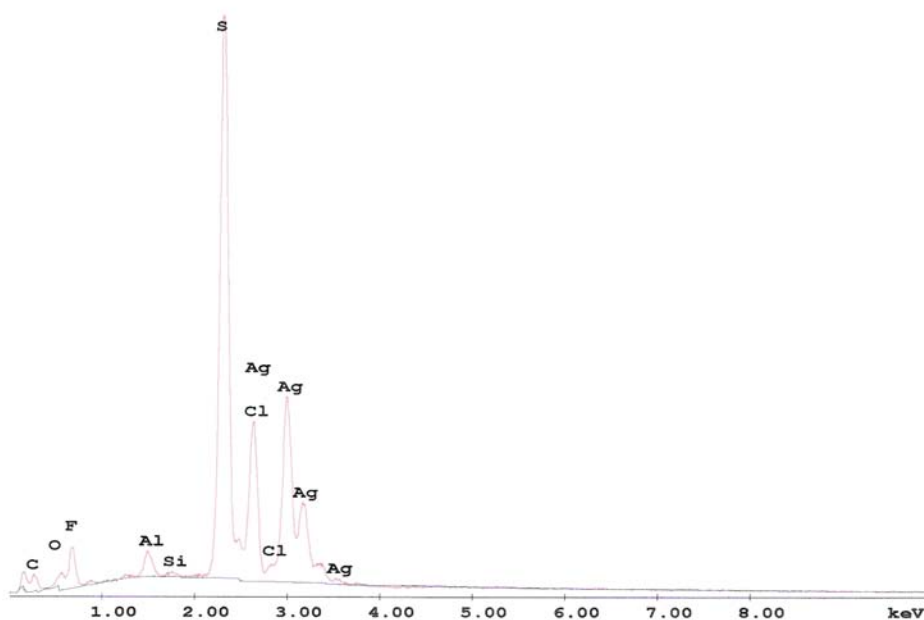

**Figure S11:** The qualitative microanalysis of the insoluble solid obtained in Section 1.4.5 prepared according to Equation 2 by Scanning Electron Microscopy (SEM).

#### 1.4.5 Purification of $3(\text{SbF}_6)_2$ prepared according to Equation 2-4 in Scheme 1 from $\text{CH}_3\text{CN}$ and $\text{CH}_2\text{Cl}_2$

Crude  $3(\text{SbF}_6)_2$  (3.098 g) was added to bulb A of a vessel of Type B (Figure S1b).  $\text{CH}_3\text{CN}$  (13.134 g; ~ 17 ml) was condensed into bulb A. A green-blue solution over a grey insoluble was obtained on warming to ambient temperature. The more soluble fraction was filtered to the bulb B. The volatiles were condensed back to bulb A. The more soluble fraction was filtered to bulb B. The washing was repeated twice more.  $\text{CH}_2\text{Cl}_2$  (32.510 g; ~ 25 ml) was condensed into bulb B. Upon warming a green solution formed over clear, pale green crystals. The more soluble fraction was filtered to bulb A. A small fraction (~ 2 ml) of the volatiles was condensed back to bulb B containing the pale green crystals. The more soluble fraction was filtered to bulb A. This was repeated twice more. The volatiles were removed under dynamic vacuum. The clear pale green crystals (2.376 g, 3.25 mmol, 62 % yield of  $3(\text{SbF}_6)_2$  based on  $1\text{SbF}_6$  and Equation 2-4 in Scheme 1) and the solid in bulb A (0.703 g) were collected in the drybox. The IR of the pale green crystals from bulb B was obtained as a Nujol mull on CsI plates (Figure S9b) and was consistent with  $3(\text{SbF}_6)_2$  by comparison to Figure S9a and the calculated frequencies and intensities in Table S4.

The solid from bulb A was washed with water on a Buchner funnel, followed by acetone and air dried for 24 hours before performing Raman microscopy (Figure S10) and qualitative EDX microanalysis by scanning electron microscopy (SEM) in Figure S11. The sample was mounted on carbon tape and the results showed the presence of mainly  $\text{S}_8$  and  $\text{AgCl}$  (Some  $\text{AgCl}$  may still be present in  $\text{SNSSbF}_6$  even after purification)<sup>20</sup> in Figure S11.

Elemental analysis Found C 9.84%, N 4.16%, S 17.07%, < H 0.5%, F 26.08%, Sb 31.9%; Calculated based on  $3(\text{SbF}_6)_2$ : C 9.85%, N 3.83%, S 17.53%, H 0%, F 31.95%, Sb 33.27%.

#### Comments:

1) We note the good agreement for C, N and S while the F analysis obtain from Galbraith Laboratories have been inconsistent, however the Sb analyses have been satisfactory (See also section 1.4.4).

#### 1.4.6 Reduction of $3(\text{SbF}_6)_2$ with CsI in $\text{SO}_2$ according to Equation 4

$3(\text{SbF}_6)_2$  (3.098 g, 4.24 mmol) and CsI (1.067 g, 4.15 mmol) were added to bulb A of a vessel of Type B (Figure S1b) with an EPR tube attached directly via ¼ inch Pyrex tube.  $\text{SO}_2$  (15.734 g; ~ 11 ml) was condensed onto the mixture in bulb A. A green-blue solution over a white insoluble (c.f.  $\text{CsSbF}_6$ ) was obtained upon warming to ambient temperature. The more soluble fraction was filtered to bulb B and the volatiles condensed back to bulb A. The more soluble fraction in bulb A was filtered into bulb B. This was repeated two more times. The more soluble fractions collected in bulb B were filtered to the attached EPR tube and the ambient temperature X-band EPR obtained (See Figure 2a, main text of Chemical Communication) which is consistent with the calculated SOMO of  $3^{3+}$  (Figure S12b). A comparison of the experimental and calculated hyperfine coupling constants ( $a$ ) for  $3^{3+}$  and related 1,3,2-dithiazolyl are given in Table S6. The volatiles were removed under dynamic vacuum. The pale green solid in bulb B (2.376 g) and the white insoluble solid in bulb A (0.703 g) were collected in the drybox. The IR of the pale green solid was obtained as a Nujol mull on KBr plates (Figure S13) and indicated a

mixture of  $3(\text{SbF}_6)_2$  and several peaks that we tentatively assign to  $3\text{SbF}_6$  based on the comparison to the calculated IR frequencies and intensities given in Table S4.

**Equation 7:**

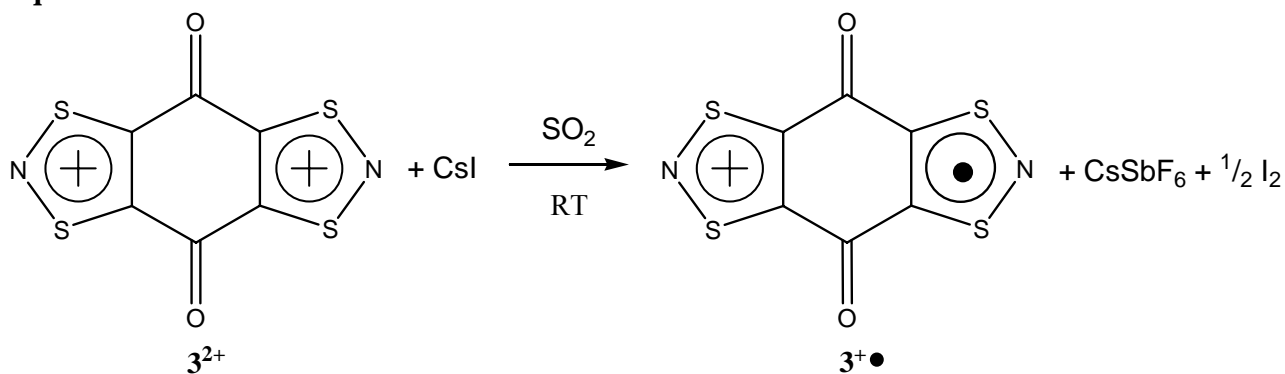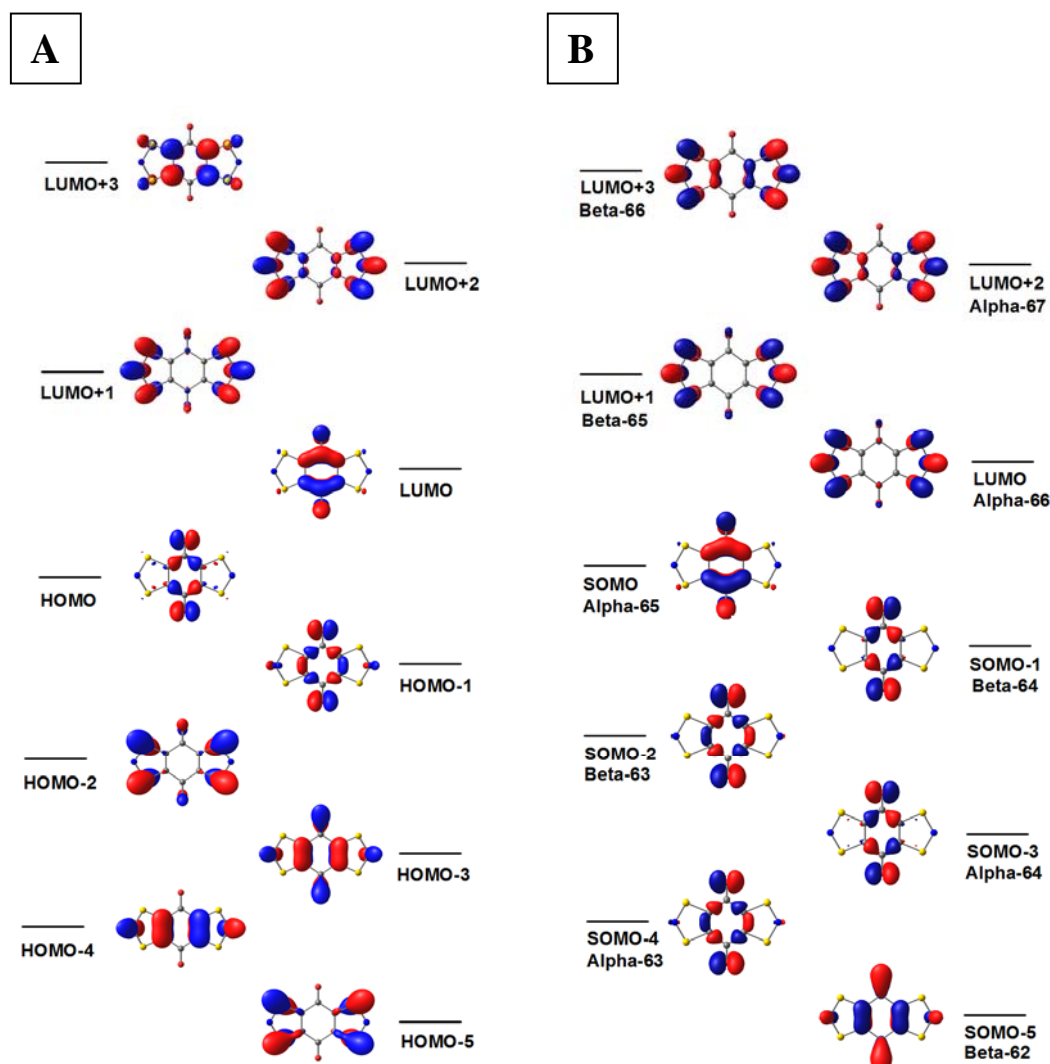

**Figure S12:** Selected frontier molecular orbitals of a)  $3^{2+}$  and b)  $3^{+\bullet}$  calculated at the B3LYP/6-311++G(d,p) level of theory.

**Discussion of Figure S12:** We note the SOMO (alpha-65) in Figure S12b of  $\mathbf{3}^{+\bullet}$  (c.f. LUMO in Figure S12a of  $\mathbf{3}^{2+}$ ) is based largely on the 1,4-benzoquinodal ring and oxygen, consistent with the observed EPR spectrum (Figure 2, main text of the Chemical Communication). This contrasts  $\mathbf{4}^{+\bullet}$  which is a typical 1,3,2-dithiazolyl radical with little delocalization of spin density on to the bridging benzo- ring.<sup>21</sup> Furthermore, the LUMO (alpha-66, Figure S12b) is largely located on the 1,3,2-dithiazolyl ring which suggests  $\mathbf{3}^{+\bullet}$  should be a diradical similar to that of  $\mathbf{4}^{+\bullet}$ .<sup>22</sup> We also note the calculated hyperfine  $a_N$  coupling (c.f. 0.108 mT, see Table S6) of  $\mathbf{3}^{+\bullet}$  is consistent with the lack of electron density on the adjacent sulphur atoms depicted in the SOMO (alpha-65, Figure S12b). In addition, the  $\pi$ -bonding HOMO-3 and HOMO-4 in Figure S12a help rationalize the similarity of the bond lengths in the 1,4-benzoquinodal bridge in  $\mathbf{3}^{2+}$  (Table S3) in comparison to 1,4-benzoquinone (Table S8; c.f. C=O 1.200 Å and 1.19 Å in  $\mathbf{3}^{2+}$  and 1,4-benzoquinone, respectively) while the anti-bonding character of the HOMO and HOMO-1 may account for the slight lengthening of the C=C bonding length (c.f. C2-C3 1.371 Å and 1.30 Å in  $\mathbf{3}^{2+}$  and 1,4-benzoquinone, respectively).

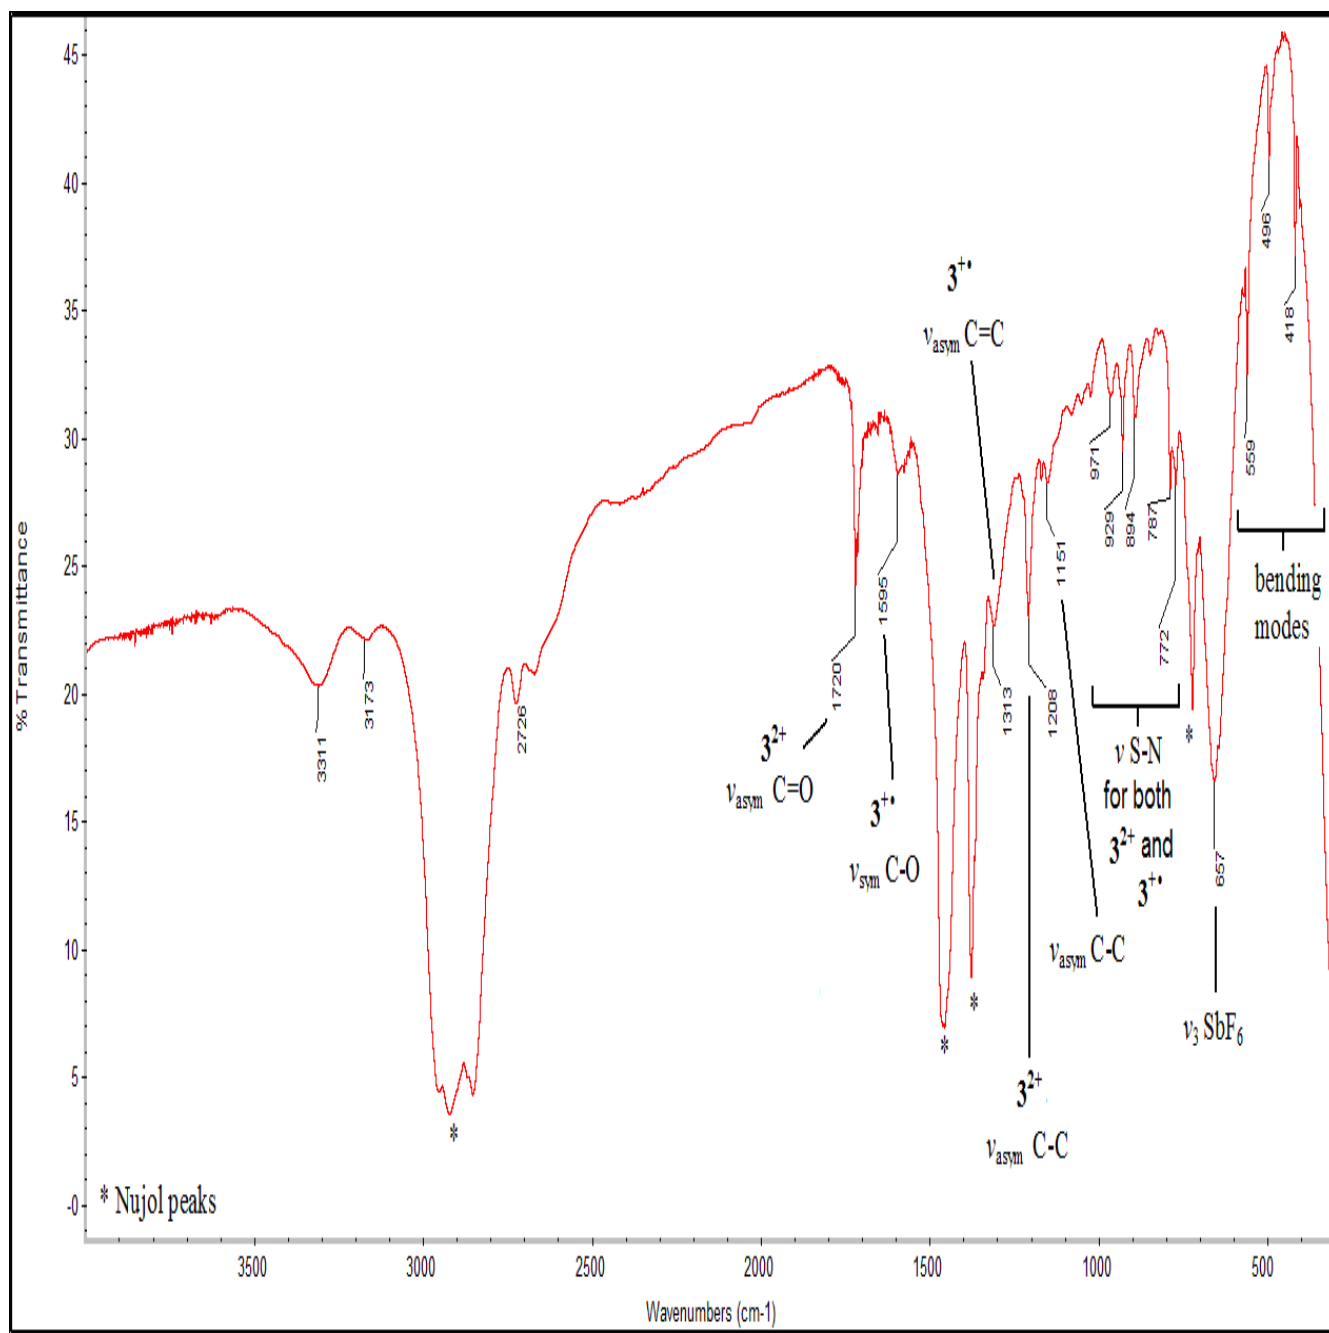

**Figure S13:** FT-IR of the recovered pale green solid from the reduction of  $3(\text{SbF}_6)_2$  with CsI in  $\text{SO}_2$  (32 scans,  $2 \text{ cm}^{-1}$  resolution) according to Equation 7. See Table S4 for comparison of experimental and calculated IR frequencies and tentative assignments (Note the tentative assignments:  $\nu$  = stretch,  $\delta$  = bending, asym. = asymmetric and sym = symmetric):

**Table S6:** Comparison of calculated (B1LYP//EPR-II/6-31G(2d,p)) and experimental hyperfine coupling constants of **1<sup>•</sup>**, **5<sup>•</sup>**, **3<sup>+•</sup>** and the related benzofused 1,3,2-dithiazolyl **9** (Atom labelling given below):

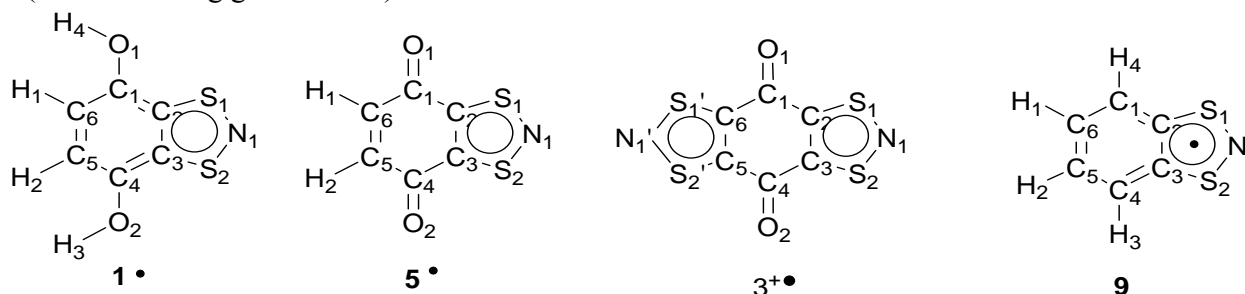

|         | <b>1<sup>•</sup></b> |                    | <b>5<sup>•</sup></b> |                   | <b>3<sup>+•</sup></b> |                   | <b>9</b>             |                    |
|---------|----------------------|--------------------|----------------------|-------------------|-----------------------|-------------------|----------------------|--------------------|
|         | Calc.                | Exp. <sup>15</sup> | Calc.                | Exp. <sup>a</sup> | Calc.                 | Exp. <sup>a</sup> | Calc.                | Exp. <sup>23</sup> |
|         | a (mT)               |                    | a (mT)               |                   | a (mT)                |                   | a (mT)               |                    |
| g-value |                      | 2.0046             |                      | 2.005             |                       | 2.007             |                      | 2.008              |
| O1      | 0.0072               |                    | -0.0619              |                   | -0.8456               |                   |                      |                    |
| O2      | 0.0072               |                    | -0.0619              |                   | -0.8456               |                   |                      |                    |
| C1      | 0.0183               |                    | -0.0647              |                   | -0.5903               |                   | 0.1229               |                    |
| C2      | -0.1637              |                    | -0.1672              |                   | 0.1495                |                   | -0.1723              |                    |
| C3      | -0.1637              |                    | -0.1672              |                   | 0.1495                |                   | -0.1723              |                    |
| C4      | 0.0183               |                    | -0.0647              |                   | -0.5903               |                   | 0.1229               |                    |
| C5      | 0.0090               |                    | 0.0069               |                   | 0.1495                |                   | 0.0076               |                    |
| C6      | 0.0090               |                    | 0.0069               |                   | 0.1495                |                   | 0.0076               |                    |
| H1      | -0.0504              |                    | -0.0291              |                   |                       |                   | -0.0919 <sup>b</sup> |                    |
| H2      | -0.0504              |                    | -0.0291              |                   |                       |                   | -0.0919 <sup>b</sup> |                    |
| H3      | -0.0058              |                    |                      |                   |                       |                   | -0.0706 <sup>b</sup> |                    |
| H4      | -0.0058              |                    |                      |                   |                       |                   | -0.0706 <sup>b</sup> |                    |
| S1      | 0.1883               |                    | 0.2261               |                   | 0.0447                |                   | 0.2246               |                    |
| S2      | 0.1883               |                    | 0.2261               |                   | 0.0447                |                   | 0.2246               |                    |
| N1      | 1.1188               | 1.073              | 1.0633               | 1.013             | -0.1080               |                   | 1.1144               | 1.12               |

<sup>a</sup> This work. <sup>b</sup> Hyperfine coupling to the H atoms have not been experimentally observed.

#### 1.4.7 *In situ* multinuclear NMR of the reaction of SNSSbF<sub>6</sub> and with two equivalents of 1,4-benzoquinone (C<sub>6</sub>H<sub>4</sub>O<sub>2</sub>) in liquid SO<sub>2</sub> designed to give 5SbF<sub>6</sub> and 1,4-hydroquinone (C<sub>6</sub>H<sub>4</sub>(OH)<sub>2</sub>) according to Equation 8b

1,4-benzoquinone (C<sub>6</sub>H<sub>4</sub>O<sub>2</sub>, 0.218 g, 2.02 mmol) and SNSSbF<sub>6</sub> (0.314 g, 1.00 mmol) were loaded in separate bulbs of a vessel of Type B (Figure S1b) with a 10 mm NMR tube directly attached via a ¼ inch Pyrex tube. SO<sub>2</sub> (9.893 g) was condensed onto both reactants to produce two yellow solutions. The two yellow solutions were mixed producing a forest green solution after stirring for 1 hr. After continuous stirring for 12 hrs a deep blue solution was obtained. A small portion (5.109 g) of the solution was poured into the NMR tube and flame sealed. The multinuclear NMR (<sup>1</sup>H, <sup>13</sup>C, <sup>14</sup>N) was followed over time (See Figure S14, S15 and S16). The remaining solution was slowly concentrated over a temperature gradient of 0-5 °C yielding blue-black solid. The volatiles were removed under dynamic vacuum and the solid collected (0.250 g, 47 % recovered of 1SbF<sub>6</sub>•C<sub>6</sub>H<sub>4</sub>O<sub>2</sub> based on SNSSbF<sub>6</sub> and Equation 8a) in the drybox. Small needles were mechanically separated from the solid and the X-ray structure determined (See Figure S17 and Table S7). The IR was obtained as a Nujol mull on CsI plates (Figure S18) and assigned as the lattice inclusion compound 1SbF<sub>6</sub>•C<sub>6</sub>H<sub>4</sub>O<sub>2</sub>. The IR (Figure S18) of 1SbF<sub>6</sub>•C<sub>6</sub>H<sub>4</sub>O<sub>2</sub> was consistent with the presence of 1,4-benzoquinone



(c.f. 1654 cm<sup>-1</sup>, br cm<sup>-1</sup> in Figure S18) and is comparable to Figure S3a which contains a small quantity of 1,4-benzoquinone. However, three frequencies (cm<sup>-1</sup>) 1095, 1022 and 804 are clearly visible in Figure S17 which are not observed in purified **1SbF<sub>6</sub>** (Figure S3b). These are tentatively assigned to C-H bending modes and out-of-plane ring bending modes on comparison to the calculated IR of **1MF<sub>6</sub>**, **1SbF<sub>6</sub>•C<sub>6</sub>H<sub>4</sub>O<sub>2</sub>** and 1,4-benzoquinone (C<sub>6</sub>H<sub>4</sub>O<sub>2</sub>) given in Table S8.

The multinuclear NMR (<sup>1</sup>H, <sup>13</sup>C, <sup>14</sup>N) clearly exhibits two unassociated species in solution (see Table S2 for comparison of experimental and calculated multinuclear NMR).

**<sup>1</sup>H-NMR:** The <sup>1</sup>H-NMR (Figure S14) indicated the presence of 1,4-benzoquinone (C-H, δ 6.8), **1SbF<sub>6</sub>** (C-H δ 8.0 and O-H δ 7.5) and NH<sub>4</sub><sup>+</sup> (1:1:1 triplet centered at δ 6.0, *J*<sub>N-H</sub> = 54 Hz).

**<sup>13</sup>C-NMR:** The decoupled <sup>13</sup>C-NMR (Figure S15) is also consistent with the assigned <sup>1</sup>H-NMR (Figure S14). The 1,4-benzoquinone δ 136.9 (C-H) and δ 188.7 (C=O) and **1SbF<sub>6</sub>** δ 154.5 (C-S), δ 146.3 (C-O) and δ 120.2 (C-H) (c.f. δ 154.8, 146.5, 119.5 for **1SbF<sub>6</sub>**)<sup>15</sup> were observed in the <sup>13</sup>C-NMR and two small unassigned peaks δ 139.3 and δ 136.1.

**<sup>14</sup>N-NMR:** The <sup>14</sup>N-NMR (Figure S16) δ -5.7 is assigned to **1SbF<sub>6</sub>** (c.f. δ -7.4)<sup>15</sup> and a poorly resolved pentet centered at δ -361.3 for NH<sub>4</sub><sup>+</sup> (*J*<sub>N-H</sub> = 54 Hz).

#### Comments:

1) The oxidation of **1SbF<sub>6</sub>** by 1,4-benzoquinone designed to give **5SbF<sub>6</sub>** based on Equation 8b was calculated (B3LYP/6-311++G\*\*) to be unfavourable in the gas phase by 67 KJ mol<sup>-1</sup>.

2) The X-ray crystal structure determination is definitive evidence of the 1:1 lattice inclusion complex **1SbF<sub>6</sub>•C<sub>6</sub>H<sub>4</sub>O<sub>2</sub>** (See Figure S17 and Table S7 for comparison of experimental and calculated bond lengths (Å) and angles (°)). We note that the major interaction between **1**<sup>+</sup> and 1,4-benzoquinone is the electrostatic S<sup>δ+</sup>...O<sup>δ-</sup> of 3.039(1) Å (Figure S17). The norbornene-like 1,4-dithia-7-azabicyclo[2.2.1]heptane derivative (Equation 8c) was not obtained<sup>24</sup>, which is unfavourable in the gas phase (B3LYP/6-31G\*) by 55 KJ mol<sup>-1</sup>.

**Equation 8a:**

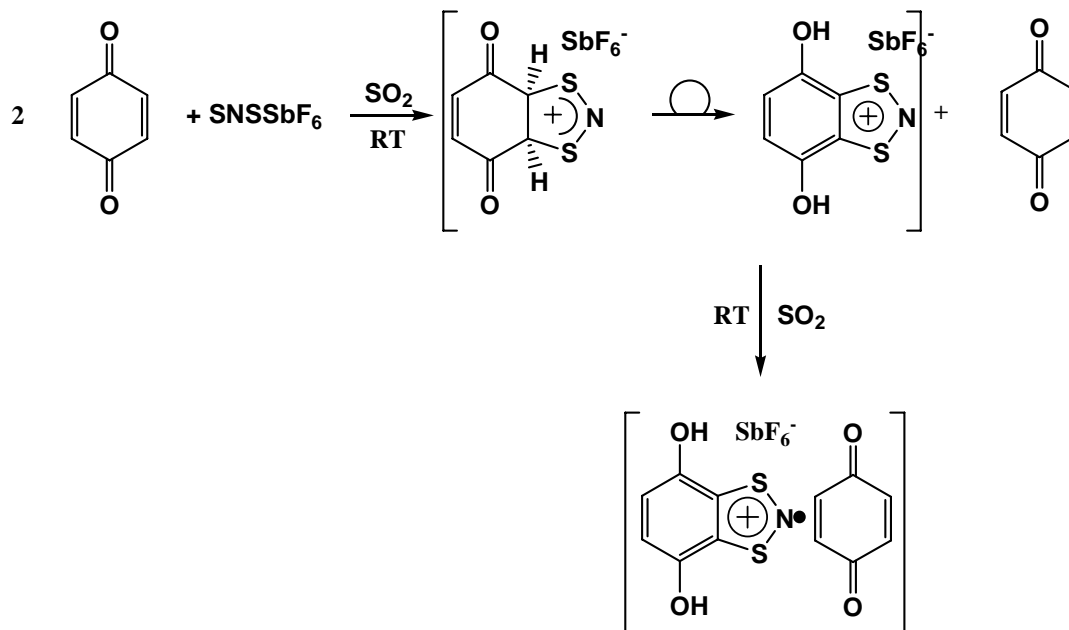

**Equation 8b:**

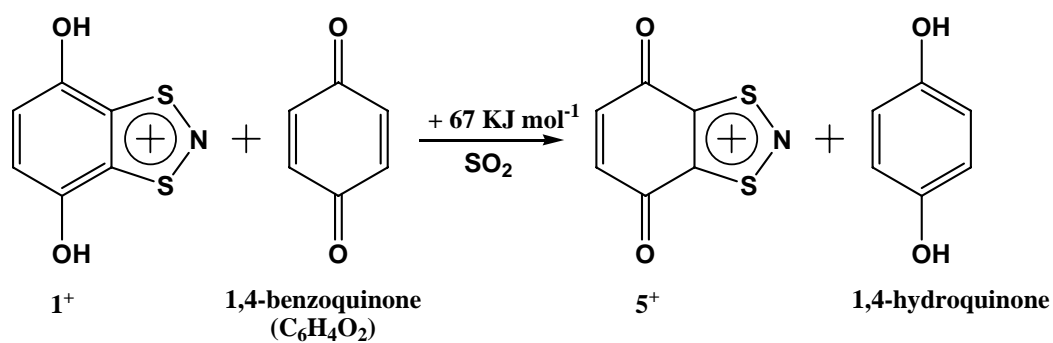

**Equation 8c:**

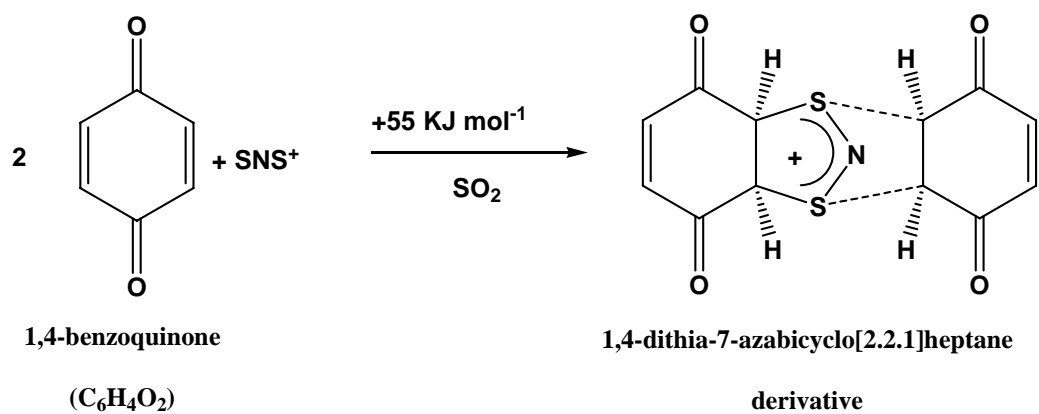

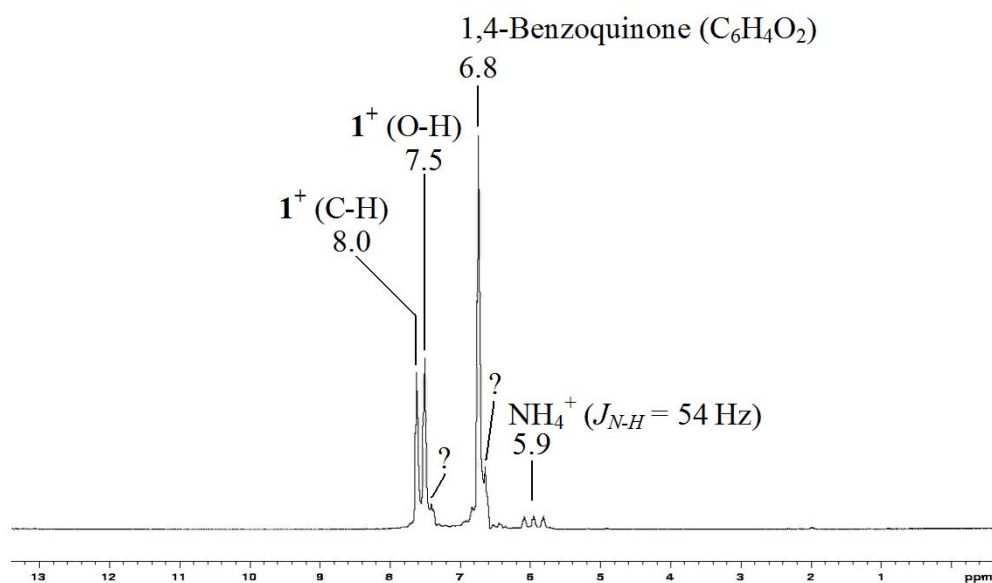

**Figure S14:**  $^1H$ -NMR of the *in situ* NMR of the reaction of  $SNSSbF_6$  and with two equivalents of 1,4-benzoquinone in liquid  $SO_2$  at 25 °C.

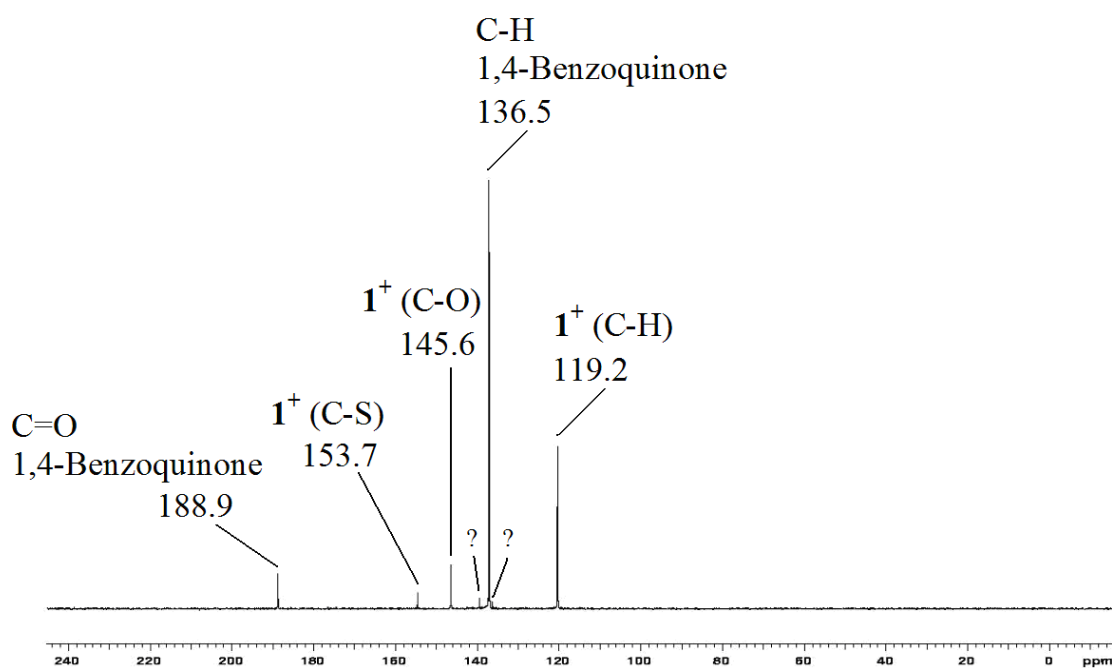

**Figure S15:**  $^{13}C$ -NMR of the *in situ* NMR of the reaction of  $SNSSbF_6$  and with two equivalents of 1,4-benzoquinone in liquid  $SO_2$  at 25 °C.

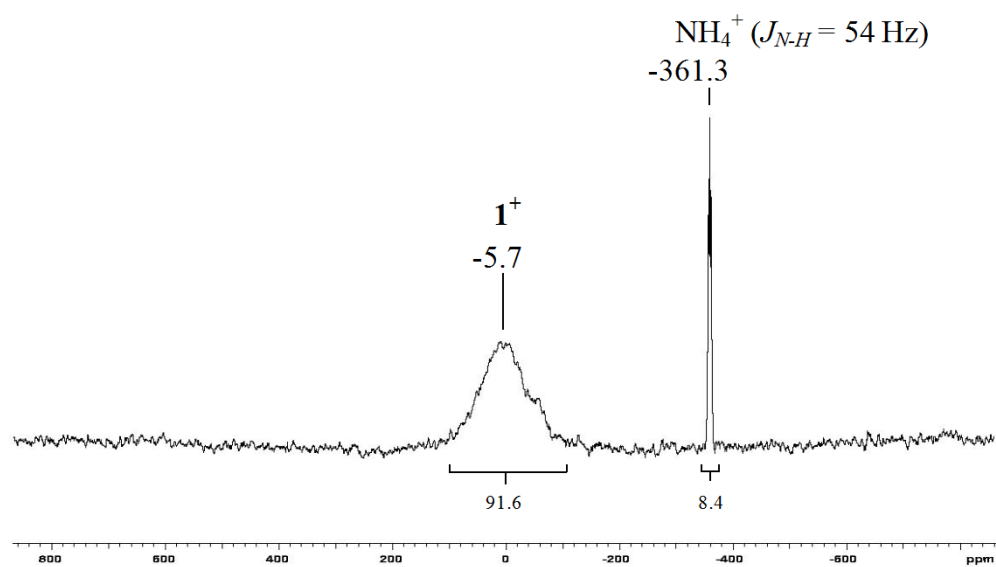

**Figure S16:**  $^{14}\text{N}$ -NMR of the *in situ* NMR of the reaction of  $\text{SNSSbF}_6$  and with two equivalents of 1,4-benzoquinone in liquid  $\text{SO}_2$  at 25  $^\circ\text{C}$ .

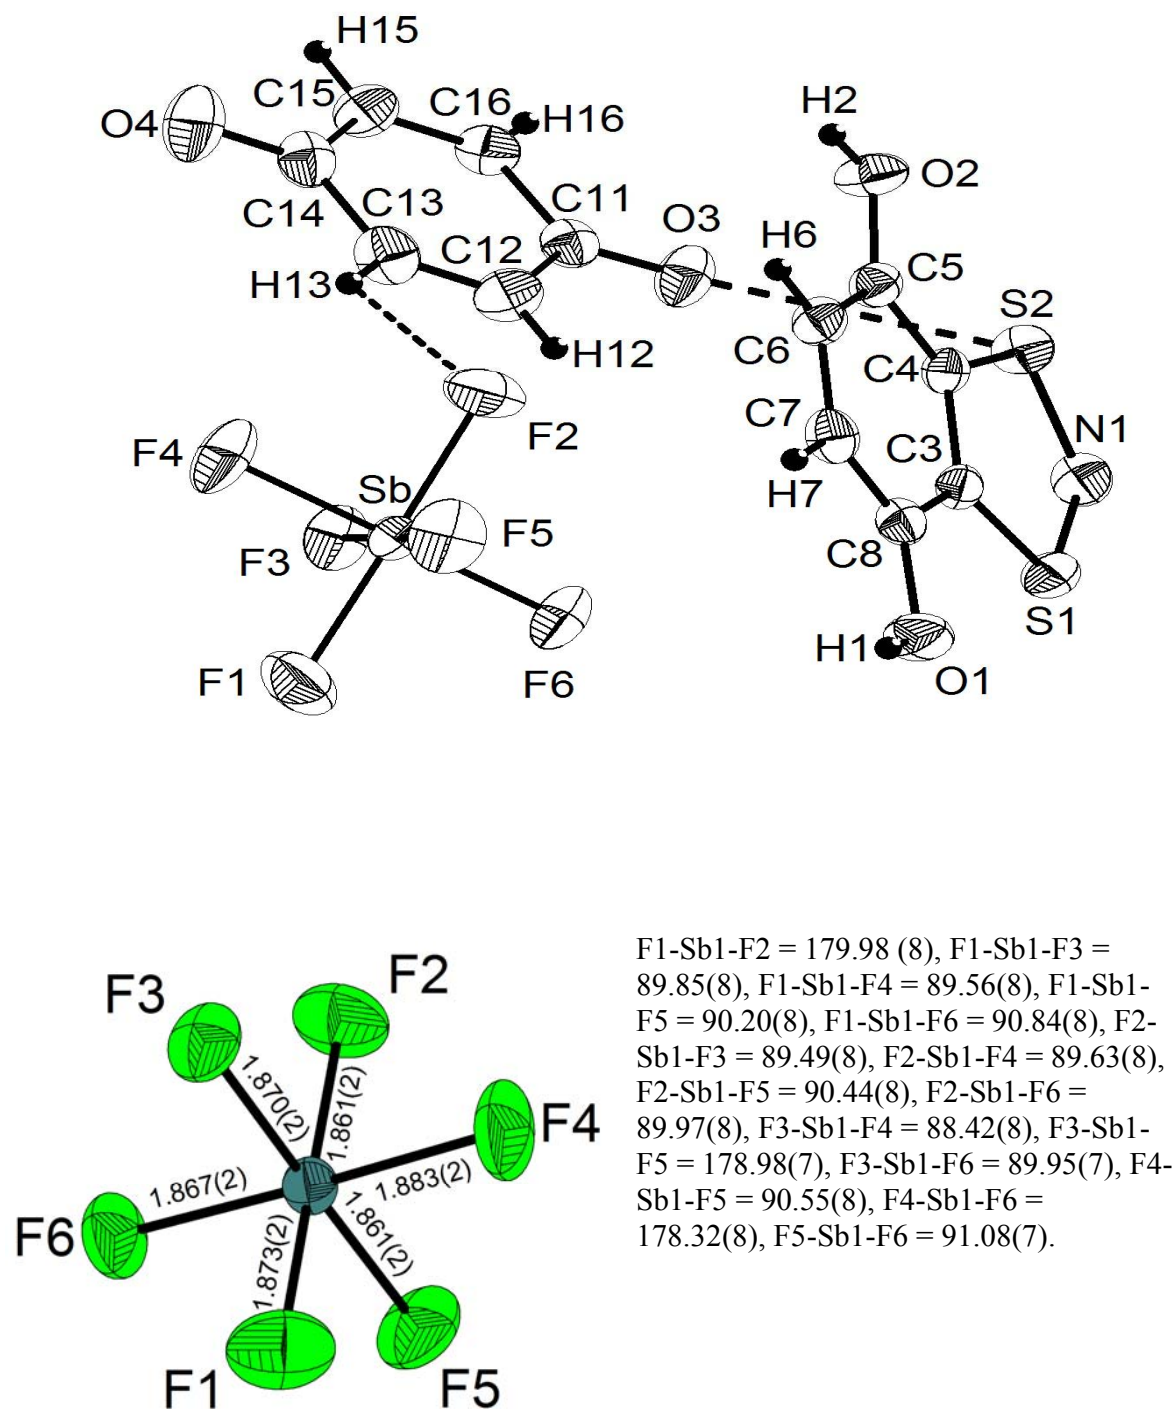

**Figure S17:** A representative view of the single crystal X-ray structure determination of  $1SbF_6 \cdot C_6H_4O_2$  and the  $SbF_6^-$  anions. Thermal ellipsoids drawn at 50 % probability and H atoms shown as black spheres (0.145 Å diameter). Hydrogen bonds and S---O interactions shown as dashed lines. Experimental and calculated bond distances (Å) and angles ( $^\circ$ ) are compared in Table S7.

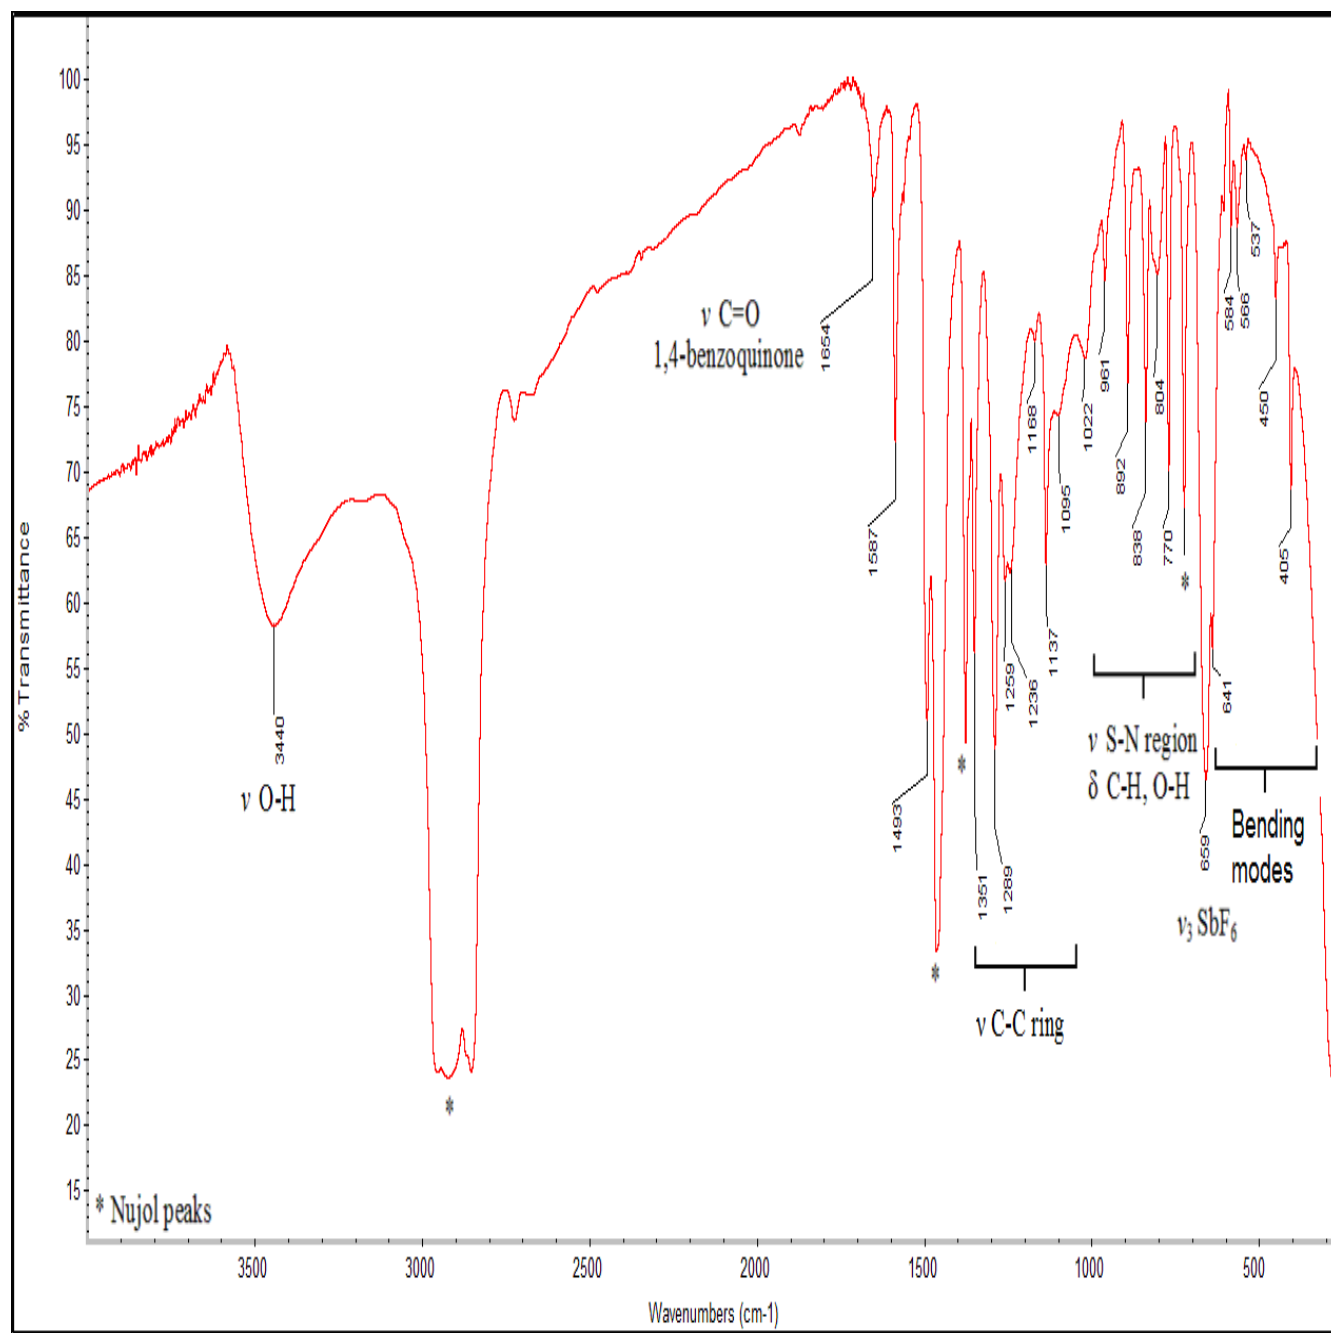

**Figure S18:** FT-IR of reaction of two equivalents of 1,4-benzoquinone (C<sub>6</sub>H<sub>4</sub>O<sub>2</sub>) with SNSSbF<sub>6</sub> to giving 1SbF<sub>6</sub>•C<sub>6</sub>H<sub>4</sub>O<sub>2</sub> as Nujol mull on KBr plates (32 scans, 2 cm<sup>-1</sup> resolution). See Table S8 for comparison of experimental and calculated IR frequencies and tentative assignments (Note the tentative assignments: ν = stretch, δ = bending, asym. = asymmetric and sym = symmetric):

**Table S7:** Comparison of calculated (B3LYP/6-311++G(d,p)) bond lengths (Å) and angles (°) of **1SbF<sub>6</sub>** and 1,4-benzoquinone (C<sub>6</sub>H<sub>4</sub>O<sub>2</sub>) and experimental bond lengths (Å) and angles (°) for **1SbF<sub>6</sub>•C<sub>6</sub>H<sub>4</sub>O<sub>2</sub>**:

| Bond            | <b>1SbF<sub>6</sub>•C<sub>6</sub>H<sub>4</sub>O<sub>2</sub></b> <sup>a</sup> | Calc.<br><b>1<sup>+</sup></b> | Calc. <sup>b</sup><br><b>1,4-benzoquinone</b><br>(C <sub>6</sub> H <sub>4</sub> O <sub>2</sub> ) |
|-----------------|------------------------------------------------------------------------------|-------------------------------|--------------------------------------------------------------------------------------------------|
| Bond Length (Å) |                                                                              |                               |                                                                                                  |
| H1-O1           | 0.638(29)                                                                    | 0.965                         |                                                                                                  |
| O1-C8           | 1.350(3)                                                                     | 1.351                         |                                                                                                  |
| C8-C3           | 1.403(4)                                                                     | 1.406                         |                                                                                                  |
| C3-C4           | 1.399(3)                                                                     | 1.413                         |                                                                                                  |
| C4-C5           | 1.404(3)                                                                     | 1.406                         |                                                                                                  |
| O2-C5           | 1.352(3)                                                                     | 1.351                         |                                                                                                  |
| H2-O2           | 0.718(37)                                                                    | 0.965                         |                                                                                                  |
| C5-C6           | 1.373(4)                                                                     | 1.387                         |                                                                                                  |
| C6-C7           | 1.394(4)                                                                     | 1.407                         |                                                                                                  |
| H6-C6           | 0.877(26)                                                                    | 1.085                         |                                                                                                  |
| C7-C8           | 1.369(4)                                                                     | 1.387                         |                                                                                                  |
| H7-C7           | 0.891(29)                                                                    | 1.085                         |                                                                                                  |
| C3-S1           | 1.707(3)                                                                     | 1.736                         |                                                                                                  |
| S1-N1           | 1.600(2)                                                                     | 1.615                         |                                                                                                  |
| S2-N1           | 1.594(2)                                                                     | 1.615                         |                                                                                                  |
| C4-S2           | 1.703(3)                                                                     | 1.736                         |                                                                                                  |
|                 |                                                                              |                               |                                                                                                  |
| C11-C12         | 1.470(4)                                                                     |                               | 1.486                                                                                            |
| O3-C11          | 1.222(3)                                                                     |                               | 1.220                                                                                            |
| C12-C13         | 1.316(4)                                                                     |                               | 1.340                                                                                            |
| H12-C12         | 0.827(34)                                                                    |                               | 1.084                                                                                            |
| C13-C14         | 1.472(4)                                                                     |                               | 1.486                                                                                            |
| H13-C13         | 0.926(28)                                                                    |                               | 1.084                                                                                            |
| C14-C15         | 1.467(4)                                                                     |                               | 1.486                                                                                            |
| O4-C14          | 1.219(3)                                                                     |                               | 1.220                                                                                            |
| C15-C16         | 1.323(4)                                                                     |                               | 1.340                                                                                            |
| H15-C15         | 0.904(27)                                                                    |                               | 1.084                                                                                            |
| C16-C11         | 1.467(4)                                                                     |                               | 1.486                                                                                            |
| H16-C16         | 0.882(28)                                                                    |                               | 1.084                                                                                            |
| Bond Angles (°) |                                                                              |                               |                                                                                                  |
| H1-O1-C8        | 110.63(241)                                                                  | 112.48                        |                                                                                                  |
| O1-C8-C3        | 116.17(23)                                                                   | 116.20                        |                                                                                                  |
| O1-C8-C7        | 126.83(24)                                                                   | 126.72                        |                                                                                                  |
| C8-C3-C4        | 121.08(23)                                                                   | 121.13                        |                                                                                                  |
| C3-C4-C5        | 121.11(23)                                                                   | 121.13                        |                                                                                                  |
| C4-C5-C6        | 116.67(23)                                                                   | 117.09                        |                                                                                                  |
| O2-C5-C4        | 115.85(21)                                                                   | 116.20                        |                                                                                                  |
| O2-C5-C6        | 127.48(23)                                                                   | 126.72                        |                                                                                                  |
| H2-O2-C5        | 110.89(299)                                                                  | 112.48                        |                                                                                                  |
| C5-C6-C7        | 122.20(24)                                                                   | 121.78                        |                                                                                                  |
| C6-C7-C8        | 121.93(24)                                                                   | 121.78                        |                                                                                                  |
| H6-C6-C5        | 119.24(173)                                                                  | 119.56                        |                                                                                                  |
| H6-C6-C7        | 118.41(171)                                                                  | 118.67                        |                                                                                                  |
| C7-C8-C3        | 117.00(24)                                                                   | 117.09                        |                                                                                                  |
| H7-C7-C8        | 115.93(176)                                                                  | 119.56                        |                                                                                                  |
| H7-C7-C6        | 122.14(176)                                                                  | 118.67                        |                                                                                                  |
| C3-S1-N1        | 99.31(12)                                                                    | 98.43                         |                                                                                                  |
| C3-C4-S2        | 112.92(18)                                                                   | 112.84                        |                                                                                                  |

|             |             |        |        |
|-------------|-------------|--------|--------|
| S1-N1-S2    | 116.13(14)  | 117.47 |        |
| C4-S2-N1    | 99.31(12)   | 98.43  |        |
| C4-C3-S1    | 112.33(19)  | 112.84 |        |
|             |             |        |        |
| C11-C12-C13 | 121.09(25)  |        | 121.33 |
| O3-C11-C12  | 120.95(24)  |        | 121.33 |
| O3-C11-C16  | 121.46(24)  |        | 121.33 |
| C12-C13-C14 | 121.59(25)  |        | 121.33 |
| H12-C12-C11 | 117.56(207) |        | 115.93 |
| H12-C12-C13 | 121.33(219) |        | 122.74 |
| C13-C14-C15 | 117.09(23)  |        | 117.34 |
| H13-C13-C12 | 122.42(170) |        | 122.74 |
| H13-C13-C14 | 115.94(167) |        | 115.93 |
| C14-C15-C16 | 121.54(25)  |        | 121.33 |
| O4-C14-C13  | 121.42(24)  |        | 121.33 |
| O4-C14-C15  | 121.48(24)  |        | 121.33 |
| C15-C16-C11 | 121.05(24)  |        | 121.33 |
| H15-C15-C14 | 117.63(179) |        | 115.93 |
| H15-C15-C16 | 120.79(171) |        | 122.74 |
| C16-C11-C12 | 117.58(22)  |        | 117.34 |
| H16-C16-C15 | 123.43(178) |        | 122.74 |
| H16-C16-C11 | 115.52(175) |        | 115.93 |

<sup>a</sup> See Table S1 for X-ray crystallographic details in Section 1.2

<sup>b</sup> Calculated at the B3LYP and 6-311++G(d,p) level of theory. See Table S9 for comparison to experimental bond length (Å) and angles (°)



**Table S8:** Comparison of calculated (B3LYP/6-311++G(d,p)) and experimental IR frequencies for  $1MF_6$  (M = As, Sb),  $1SbF_6 \cdot C_6H_4O_2$  and 1,4-benzoquinone ( $C_6H_4O_2$ ):

| $1MF_6$ (M = As, Sb)    |                                       |                                       | $1SbF_6 \cdot C_6H_4O_2$ | 1,4-benzoquinone<br>$C_6H_4O_2$ | Tentative Assignments <sup>a</sup>                   |
|-------------------------|---------------------------------------|---------------------------------------|--------------------------|---------------------------------|------------------------------------------------------|
| IR (Calc.) <sup>e</sup> | Observed IR ( $1SbF_6$ ) <sup>b</sup> | Observed IR ( $1AsF_6$ ) <sup>c</sup> | Observed IR <sup>d</sup> | IR (Calc.) <sup>e</sup>         |                                                      |
| 3817 (48)               |                                       |                                       |                          |                                 |                                                      |
| 3815 (86)               | 3449vs,br                             | 3481 vs,br                            | 3440vs, br               |                                 | $v_{sym}$ OH                                         |
| 3189 (1)                |                                       |                                       |                          |                                 |                                                      |
| 3178 (1)                | 3169s,br                              | 3164s,br                              |                          |                                 | $v_{asym}$ OH                                        |
|                         |                                       |                                       |                          | 3195 (0)                        |                                                      |
|                         |                                       |                                       |                          | 3192 (1)                        |                                                      |
|                         |                                       |                                       |                          | 3176 (1)                        |                                                      |
|                         |                                       |                                       |                          | 3176 (1)                        |                                                      |
|                         |                                       |                                       |                          | 1668 (1)                        |                                                      |
|                         |                                       |                                       | 1654m                    | 1667 (100)                      | $v_{asym}$ C=O                                       |
| 1628 (2)                |                                       |                                       |                          |                                 |                                                      |
|                         |                                       |                                       |                          | 1616 (0)                        |                                                      |
| 1609 (21)               | 1587m                                 | 1586m                                 | 1587m                    |                                 | Inp. $vC-C + v_{asym}C-O$                            |
|                         |                                       |                                       |                          | 1584 (4)                        |                                                      |
| 1515 (100)              | 1492s,sh                              | 1489s,sh                              | 1493s,sh                 |                                 | Inp. $vC-C + v_{sym}C-O$                             |
| 1419 (0)                |                                       |                                       |                          |                                 |                                                      |
|                         |                                       |                                       |                          | 1393 (0)                        |                                                      |
|                         |                                       |                                       |                          | 1383 (1)                        |                                                      |
| 1369 (24)               | 1351s,sh                              | 1350s,sh                              | 1351s,sh                 |                                 | Inp. $vC-C + \delta_{sym}C-H$                        |
| 1319 (92)               | 1289s                                 | 1286s                                 | 1289s                    |                                 | Inp. $vC-C + \delta_{asym}C-H$ bending               |
|                         |                                       |                                       |                          | 1313 (17)                       |                                                      |
| 1305 (16)               |                                       |                                       |                          |                                 |                                                      |
|                         |                                       |                                       | 1259m,sh                 |                                 | Inp. $v_{asym}C-C$ ring + $\delta_{asym}C-H$ bending |
|                         |                                       |                                       |                          | 1232 (0)                        |                                                      |
| 1223 (88)               | 1243s,br                              | 1236s,br                              | 1236m,sh                 |                                 | $\delta_{asym}O-H$                                   |
| 1186 (4)                | 1171w                                 | 1168w                                 | 1168w                    |                                 | $\delta_{sym}C-H + \delta_{sym}OH$                   |
|                         |                                       |                                       |                          | 1167 (0)                        |                                                      |
| 1144 (2)                |                                       |                                       |                          |                                 |                                                      |
| 1134 (27)               | 1137m                                 | 1136m                                 | 1137m                    |                                 | $\delta_{asym}C-H + \delta_{asym}OH$                 |
|                         |                                       |                                       | 1095m,sh                 | 1083 (10)                       |                                                      |
|                         |                                       |                                       | 1022 m,br                | 1011 (0)                        |                                                      |
|                         |                                       |                                       |                          | 1004 (0)                        |                                                      |
| 982 (0)                 |                                       |                                       |                          |                                 |                                                      |
| 954 (7)                 | 961w                                  | 963w                                  | 961w                     |                                 | Opp. $vC-C + \delta_{sym}C-H$ bending                |
|                         |                                       |                                       |                          | 947 (4)                         |                                                      |
| 934 (0)                 |                                       |                                       |                          |                                 |                                                      |
|                         |                                       |                                       |                          | 901 (17)                        |                                                      |
| 892 (15)                | 892m                                  | 891m                                  | 892m                     |                                 | $v_{asym}S-N$                                        |
| 839 (17)                | 838m                                  | 836m                                  | 838m                     |                                 |                                                      |

|          |          |          |          |         |                                |
|----------|----------|----------|----------|---------|--------------------------------|
|          |          |          | 804m     | 780 (0) |                                |
|          |          |          |          | 769 (0) | Opp. $\delta_{\text{sym}}$ C-H |
| 764 (14) | 771m     | 773m     | 770m     |         | $\nu_{\text{sym}}$ S-N         |
|          |          |          |          | 754 (0) |                                |
|          |          |          |          | 752 (0) |                                |
| 727 (12) |          |          |          |         |                                |
|          |          | 698vs,br |          |         | $\nu_3 \text{AsF}_6^-$         |
|          | 659vs,br |          | 659vs,br |         | $\nu_3 \text{SbF}_6^-$         |
|          |          | 673s,sh  |          |         | ?                              |
|          | 635s,sh  |          | 642s,sh  |         | ?                              |
|          |          | 603w     |          |         | ?                              |
|          |          |          |          | 602 (0) |                                |
| 589 (0)  |          |          |          |         |                                |
| 586 (2)  | 584w     | 580w     | 584w     |         | $\delta$ CSNSC ring            |
| 584 (0)  |          |          |          |         |                                |
| 564 (5)  | 566w     | 564w     | 566w     |         | Inp. $\delta$ ring             |
| 536 (0)  |          | 538w     | 537w     |         | Inp. $\delta$ ring             |
|          |          |          |          | 513 (1) |                                |
|          |          |          |          | 458 (0) |                                |
|          |          |          |          | 455 (0) |                                |
| 449 (2)  | 450w     | 450w     | 450w     |         | Inp. $\delta$ ring             |
|          |          |          |          | 413 (5) |                                |
| 412 (5)  | 405m     |          | 405m     |         | Opp. $\delta$ ring             |
| 406 (0)  |          |          |          |         |                                |
|          |          | 393vs    |          |         | $\nu_4 \text{AsF}_6^-$         |
| 395 (0)  |          |          |          |         |                                |
| 335 (0)  |          |          |          | 332 (0) |                                |
| 299 (85) |          |          |          |         |                                |
| 287 (0)  |          |          |          |         |                                |
| 263 (0)  |          |          |          |         |                                |
| 202 (2)  |          |          |          | 212 (0) |                                |
| 183 (1)  |          |          |          |         |                                |
| 136 (2)  |          |          |          |         |                                |
| 120 (0)  |          |          |          |         |                                |
|          |          |          |          | 90 (3)  |                                |

<sup>a</sup> Assignment where made by visualization in Chemcraft <sup>14</sup> ( $\nu$  = stretching,  $\delta$  = bending, Asym. = asymmetric, Sym. = symmetric, Inp. = in-plane, Opp = out-of-plane). <sup>b</sup> See Figure S3b for FT-IR spectra. <sup>c</sup> See Figure S2b for FT-IR spectra <sup>d</sup> See Figure S18 for FT-IR spectra <sup>e</sup> Calculated at the B3LYP/6-311++G(d,p) level of theory.

**Table S9:** Comparison of experimental<sup>25</sup> and calculated (B3LYP/6-311++G(d,p)) bond lengths (Å) and angles (°) of 1,4-Benzoquinone (C<sub>6</sub>H<sub>4</sub>O<sub>2</sub>) (Atom labelling is given to right):

|                 | 1,4-benzoquinone:<br>C <sub>6</sub> H <sub>4</sub> O <sub>2</sub> (X-ray) <sup>25</sup> | 1,4-benzoquinone:<br>C <sub>6</sub> H <sub>4</sub> O <sub>2</sub> (Calc.) |
|-----------------|-----------------------------------------------------------------------------------------|---------------------------------------------------------------------------|
| Bond Length (Å) |                                                                                         |                                                                           |
| O1-C1           | 1.222(8)                                                                                | 1.220                                                                     |
| C1-C2           | 1.477(6)                                                                                | 1.486                                                                     |
| C2-C3           | 1.322(8)                                                                                | 1.340                                                                     |
| Bond Angle (°)  |                                                                                         |                                                                           |
| O1-C1-C2        | 121.06(27)                                                                              | 121.33                                                                    |
| C1-C2-C3        | 121.06(27)                                                                              | 121.33                                                                    |
| C2-C1-C2'       | 117.48(37)                                                                              | 117.34                                                                    |

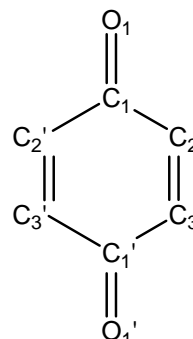

#### 1.4.8 Oxidation of 1AsF<sub>6</sub> with three equivalents of AsF<sub>5</sub> in the presence of NEt<sub>3</sub> leading to 5AsF<sub>6</sub> according to Equation 5

Purified 1AsF<sub>6</sub> (1.097 g, 2.93 mmol) was added in bulb A of a vessel of Type B (Figure S1b). NEt<sub>3</sub> (1 ml, 7.17 mmol) and CH<sub>2</sub>Cl<sub>2</sub> (15 ml) were syringed into bulb B in the drybox and degassed by three freeze-pump-thaw cycles. SO<sub>2</sub> (10.314 g) and AsF<sub>5</sub> (1.536 g, 9.04 mmol) were condensed into bulb A consecutively. Upon warming a rapid color change from blue to dark purple was observed and the solution was stirred for 2-5 min. The solution in bulb B was quickly poured into bulb A. Immediately a brown precipitate under an orange-brown solution was obtained. The more soluble fraction was filtered to bulb B and the volatiles removed under dynamic vacuum. Fresh SO<sub>2</sub> (4.378 g; ~3 ml) and CH<sub>2</sub>Cl<sub>2</sub> (16.689 g; ~13 ml) were condensed into bulb A. A brown solution over a dark insoluble was obtained on warming and the more soluble fraction was filtered to bulb B. The volatiles were condensed back into bulb A and the solid washed and the more soluble fraction filtered to bulb B. The washing was repeated twice more to give a dark purple solid in bulb A. The volatiles were removed and a dark brown solid was obtained in bulb B. The dark purple solid in bulb A (0.973 g, 89 % yield based on 1AsF<sub>6</sub> and Equation 5) and the brown solid in bulb B (0.103 g) were collected in the drybox. The IR of the purple solid in bulb A was obtained as a Nujol mull on CsI plates (Figure S19) and was consistent with 5AsF<sub>6</sub> based on comparison of the experimental and calculated IR frequencies given in Table S10.

#### Comments:

1) We note the absence of the very strong, broad ν O-H (c.f. 3450 cm<sup>-1</sup> in Figure S2b) and a strong ν C-O (c.f. 1586 cm<sup>-1</sup> in Figure S2b) and the appearance of a new frequency at 1688 cm<sup>-1</sup> (Figure S19) assigned to the ν C=O of 5AsF<sub>6</sub>. Furthermore, we note the difference of Figure S19 compared to Figure S2b between 1500-1000 cm (ν C-C and δ C-H region) is attributed to the conversion of the benzenoid (1<sup>+</sup>) to the quinodal (5<sup>+</sup>) ring.

**Equation 5:**

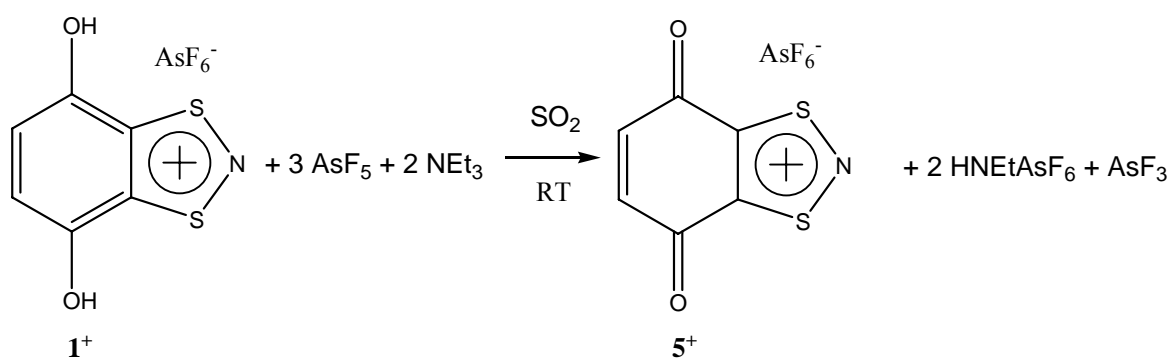

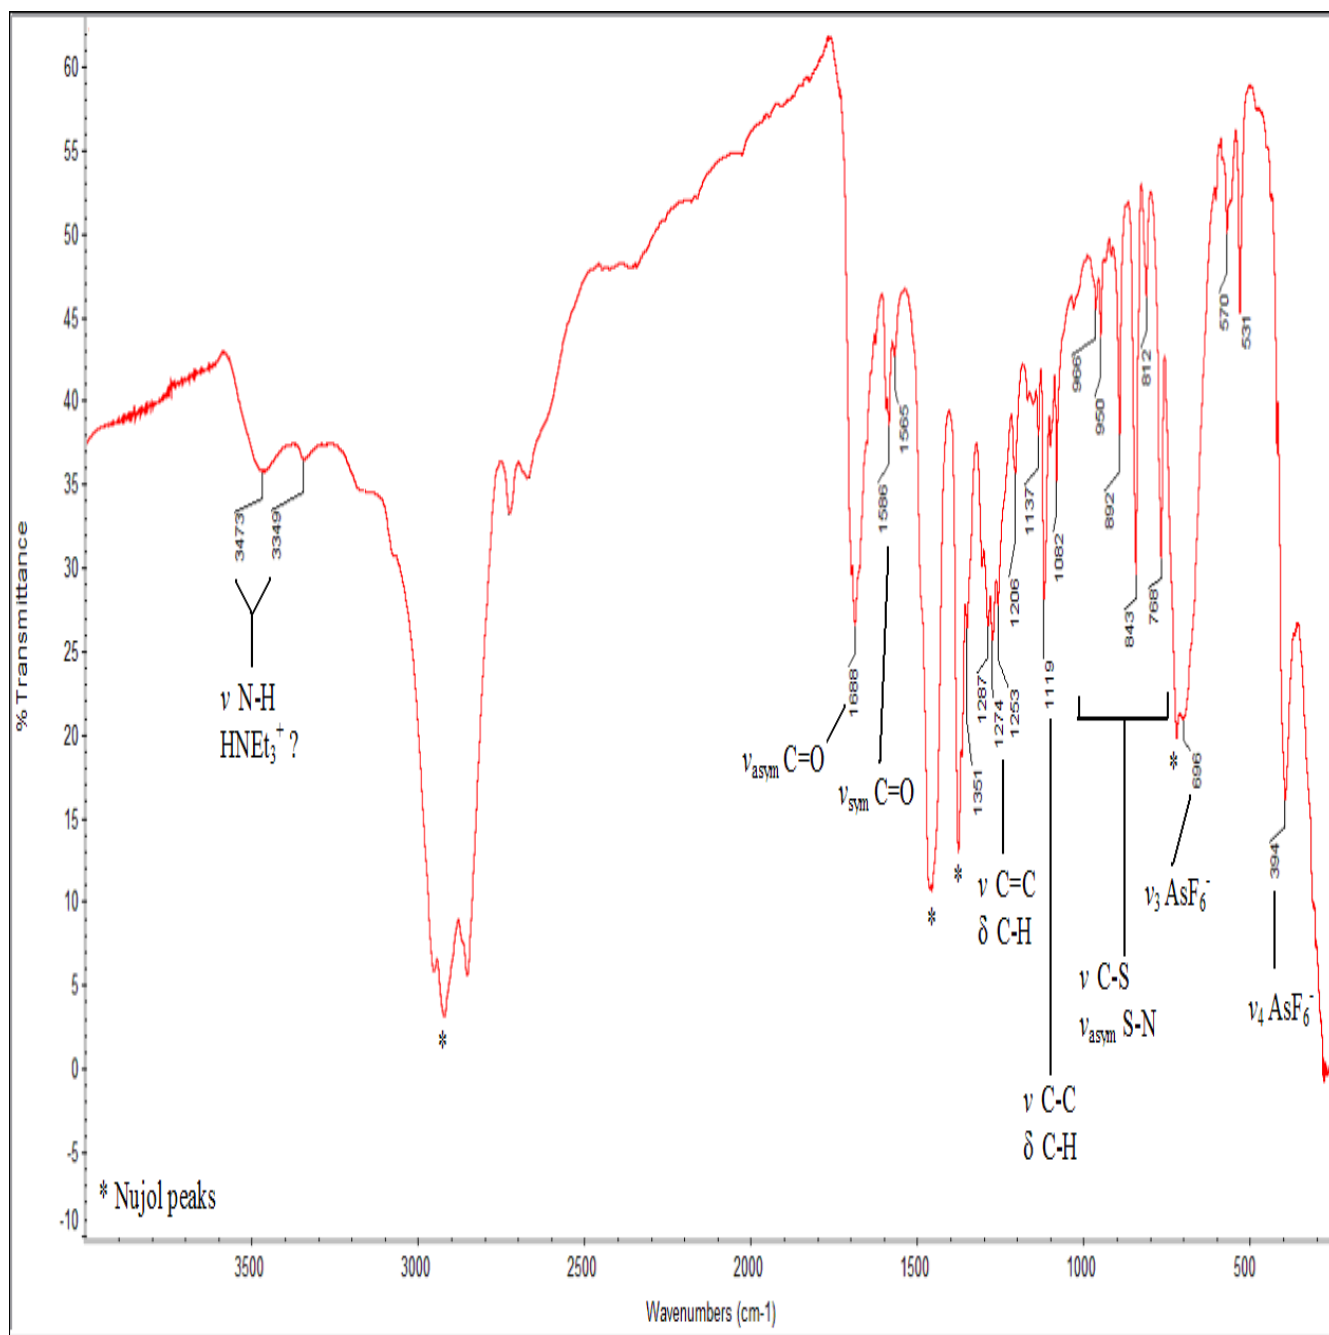

**Figure S19:** FT-IR of 5AsF<sub>6</sub> prepared according to Equation 5 as a Nujol mull on KBr plates (32 scans, 2 cm<sup>-1</sup> resolution). See Table S10 for comparison of experimental and calculated IR frequencies and tentative assignments (Note the tentative assignments:  $\nu$  = stretch,  $\delta$  = bending, asym. = asymmetric and sym = symmetric):

**Table S10:** Comparison of calculated (B3LYP/6-311++G(d,p) and experimental IR frequencies for  $5^+$  and  $5^-$ .

| $5AsF_6$                      |                        | Tentative Assignments <sup>a</sup>         | $5^-$                         |                        | Tentative Assignments <sup>a</sup>         |
|-------------------------------|------------------------|--------------------------------------------|-------------------------------|------------------------|--------------------------------------------|
| IR/Raman (Calc.) <sup>c</sup> | IR (Obs.) <sup>b</sup> |                                            | IR/Raman (Calc.) <sup>c</sup> | IR (Obs.) <sup>c</sup> |                                            |
| 3202 (4/85)                   |                        |                                            | 3199 (1/)                     |                        |                                            |
| 3190 (1/27)                   |                        |                                            | 3182 (1/)                     |                        |                                            |
| 1698 (100/0) <sub>d</sub>     | 1688vs                 | $\nu_{asym} C=O$                           | 1659 (4/) <sup>d</sup>        |                        |                                            |
| 1691 (0/100) <sub>d</sub>     | 1586m                  | $\nu_{sym} C=O$                            | 1646 (100/) <sup>d</sup>      | 1643s, br              | $\nu_{asym} C=O$                           |
| 1585 (6/31) <sup>d</sup>      | 1565w                  | $\nu HC=CH$                                | 1603 (1/) <sup>d</sup>        |                        |                                            |
| 1493 (1/13)                   |                        |                                            | 1555 (15/)                    | 1558vs, br             | $\nu SC=CS$                                |
| 1383 (3/4)                    | 1351m,sh               | Inp. $\nu C-C + \delta_{asym} C-H$ bending | 1376 (0/)                     |                        |                                            |
| 1269 (33/6)                   | 1274s,br               | Inp. $\nu C-C + \delta_{sym} C-H$ bending  | 1287 (20/)                    | 1296s,br               | Inp. $\nu C-C + \delta_{asym} C-H$ bending |
|                               |                        |                                            |                               | 1262s,br               |                                            |
| 1258 (2/1)                    |                        |                                            | 1212 (7/)                     | 1219s,br               | Inp. $\nu C-C + \delta_{sym} C-H$ bending  |
|                               | 1206w                  |                                            | 1128 (40/)                    | 1103m,br               | $\delta_{sym} C-H$ bending                 |
|                               | 1137w                  |                                            | 1010 (0/)                     | 1043m,sh               | $\nu$ ring                                 |
| 1113 (24/19)                  | 1119m                  | Inp. $\nu C-C + \delta_{sym} C-H$ bending  | 1001 (3/)                     | 1022m,sh               | Opp. $\delta_{asym} C-H$ bending           |
| 1073 (6/5)                    | 1082w                  | $\nu C-C + \nu C-S$                        | 922 (4/)                      |                        |                                            |
| 1009 (0/1)                    | 966w                   |                                            | 880 (7/)                      | 891w                   | $\nu$ ring                                 |
| 939 (1/0)                     |                        |                                            | 852 (14/)                     | 821m,br                | Opp. $\delta_{sym} C-H$ bending            |
| 930 (1/4)                     | 950w                   |                                            | 756 (0/)                      | 769m,sh                | $\delta_{asym} S-N$ bending                |
| 889 (1/2)                     | 892w                   |                                            | 702 (1/)                      |                        |                                            |
| 866 (14/0)                    | 843m                   | Opp. $\nu C-C + \delta_{sym} C-H$ bending  | 695 (1/)                      |                        |                                            |
|                               | 812w                   |                                            | 650 (1/)                      |                        |                                            |
| 752 (11/7)                    | 768m,sh                | $\nu_{sym} S-N$                            | 590 (1/)                      |                        |                                            |
| 707 (1/0)                     |                        |                                            | 576 (1/)                      |                        |                                            |
|                               | 696vs,br               | $\nu_3 AsF_6^-$                            |                               | 688s,br                | $\nu_3 AsF_6^-$ <sup>c</sup>               |
|                               |                        |                                            | 551 (2/)                      | 521w                   | Ring bending                               |
| 689 (0/1)                     |                        |                                            | 492 (2/)                      |                        |                                            |
| 595 (0/1)                     |                        |                                            | 446 (1/)                      | 452w,br                | Ring bending                               |
| 586 (1/9)                     | 570w                   |                                            | 364 (0/)                      |                        |                                            |
| 577 (0/1)                     |                        |                                            | 345 (7/)                      |                        |                                            |
| 531 (7/3)                     | 531w                   |                                            | 313 (1/)                      |                        |                                            |
| 436 (0/2)                     |                        |                                            | 245 (0/)                      |                        |                                            |
| 427 (4/0)                     |                        |                                            | 198 (1/0)                     |                        |                                            |
|                               | 394vs                  | $\nu_4 AsF_6^-$                            |                               | 388s,sh                | $\nu_4 AsF_6^-$ <sup>c</sup>               |
| 391 (1/2)                     |                        |                                            | 193 (1/0)                     |                        |                                            |
| 379 (0/1)                     |                        |                                            | 161 (1/0)                     |                        |                                            |
| 307 (3/1)                     |                        |                                            | 88 (1/0)                      |                        |                                            |
| 250 (0/1)                     |                        |                                            | 72 (0/)                       |                        |                                            |
| 186 (0/1)                     |                        |                                            |                               |                        |                                            |
| 178 (1/0)                     |                        |                                            |                               |                        |                                            |
| 84 (3/0)                      |                        |                                            |                               |                        |                                            |
| 66 (0/1)                      |                        |                                            |                               |                        |                                            |

<sup>a</sup> Assignment where made by visualization in Chemcraft<sup>14</sup> ( $\nu$  = stretching,  $\delta$  = bending, Asym. = asymmetric, Sym. = symmetric, Inp. = in-plane, Opp = out-of-plane). <sup>b</sup> See Figure S19 for FT-IR spectra. <sup>c</sup> See Figure S25 for FT-IR spectra <sup>d</sup> The  $\nu C=O$  and  $\nu (OC)-C=C-(CO)$  stretching frequencies are scaled by 0.965. <sup>e</sup> Calculated at the B3LYP/6-311++G(d,p) level of theory.

**1.4.9 Multinuclear NMR of 5AsF<sub>6</sub> prepared according to Equation 5 in liquid SO<sub>2</sub>**  
SO<sub>2</sub> (4.717 g) was condensed onto 5AsF<sub>6</sub> (0.138 g, 0.37 mmol) in a 10 mm NMR tube (Figure S1d) and flame sealed. Upon warming a dark orange solution over a small quantity of an unidentified brown insoluble was obtained. See Figure S20-S23 for actual multinuclear NMR spectra.

**<sup>1</sup>H-NMR:** The <sup>1</sup>H-NMR (Figure S20) was assigned to 5<sup>+</sup> (broad resonance δ 8.43 (C-H)) and HNEt<sub>3</sub><sup>+</sup> (δ 6.34 (N-H), δ 4.33 (N-CH<sub>2</sub>CH<sub>3</sub>) and δ 2.40 (N-CH<sub>2</sub>CH<sub>3</sub>)). The integration in Figure S20 is consistent with Equation 5 (e.g. approximately one 5<sup>+</sup> relative to two HNEt<sub>3</sub><sup>+</sup>).

**<sup>13</sup>C-NMR:** The decoupled <sup>13</sup>C-NMR (Figure S21b) was consistent with 5<sup>+</sup> (δ 177.2 (C-S), δ 175.1 (C=O) and δ 140.0 (C-H; *J*<sub>C-H</sub> = 177 Hz from coupled <sup>13</sup>C-NMR (Figure S21a)) and HNEt<sub>3</sub><sup>+</sup> (δ 49.0 (N-CH<sub>2</sub>CH<sub>3</sub>) and δ (N-CH<sub>2</sub>CH<sub>3</sub>), respectively in Figure S21.

**<sup>14</sup>N-NMR:** The <sup>14</sup>N-NMR (Figure S22) exhibited 9 resonances. A broad resonance at δ 1.8 (*v*<sub>1/2</sub> 662 Hz) is assigned to 5<sup>+</sup> (c.f. δ -7.4 (*v*<sub>1/2</sub> 540 Hz) for 1<sup>+</sup>), while a doublet centered at δ -317.5 (*v*<sub>1/2</sub> 109 Hz, *J*<sub>N-H</sub> = 50 Hz) and a poorly resolved pentet centered at δ -360.0 (*v*<sub>1/2</sub> 139 Hz, *J*<sub>N-H</sub> = 54 Hz) are assigned to HNEt<sub>3</sub><sup>+</sup> and NH<sub>4</sub><sup>+</sup>, respectively (Figure S22). Six other sharp resonances δ -69.7, -113.3, -133.4, -140.5, -169.9, -190.1 are unassigned which based on the integration are ~11% of the total species in solution.

**<sup>19</sup>F-NMR:** The <sup>19</sup>F-NMR (Figure S23) shows three resonances. Two are assigned to AsF<sub>3</sub> (δ -41.4) and AsF<sub>6</sub><sup>-</sup> (Expected 1:1:1:1 quartet appears exchange broadened as a 1:1 doublet centered at δ -56.3) while one δ -46.1 is unassigned (Figure S23). The integration ratio of AsF<sub>3</sub> and AsF<sub>6</sub><sup>-</sup> only is 1:9, respectively. This corresponds to ~25 % AsF<sub>3</sub> according to Equation 5 remains in isolated 5AsF<sub>6</sub> after removal of the volatiles (Section 1.4.4).

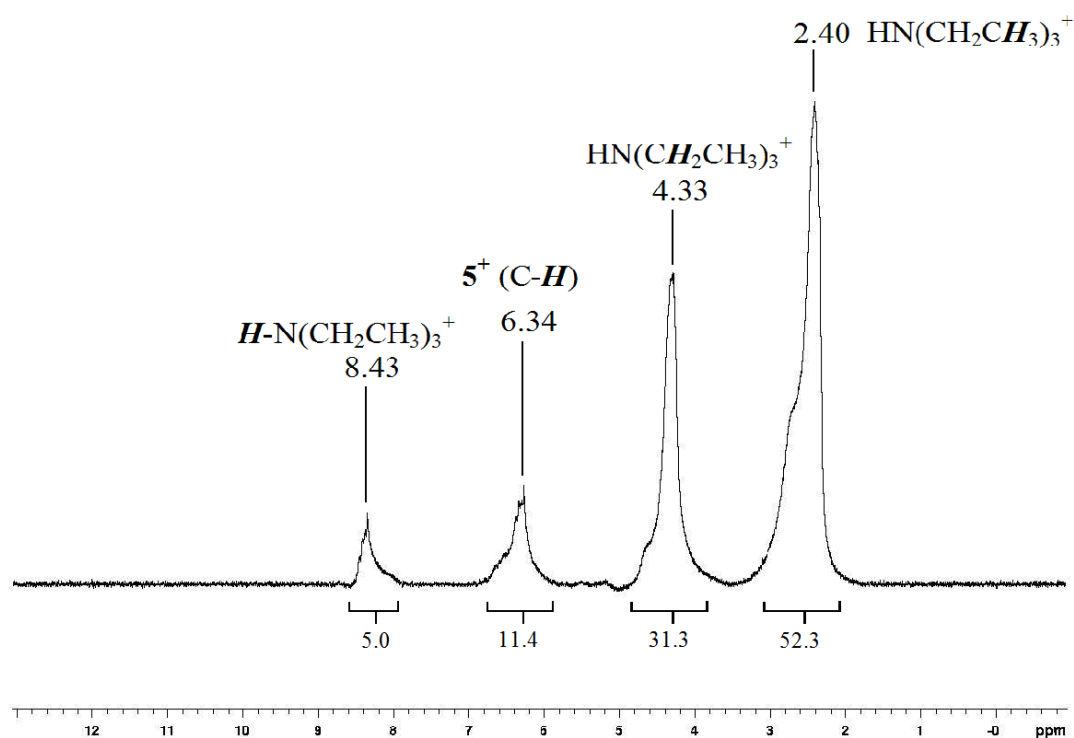

Figure S20:  $^1\text{H-NMR}$  of  $5\text{AsF}_6$  prepared according to Equation 5 in liquid  $\text{SO}_2$  at  $25\text{ }^\circ\text{C}$ .

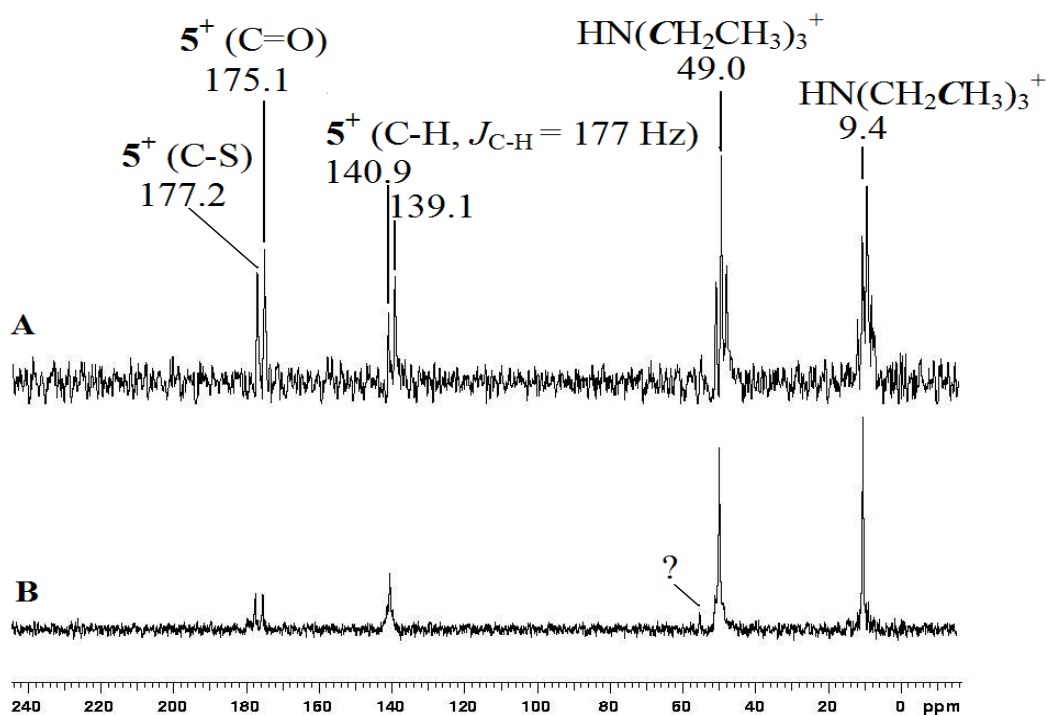

Figure S21:  $^{13}\text{C-NMR}$  of  $5\text{AsF}_6$  prepared according to Equation 5 in liquid  $\text{SO}_2$  at  $25\text{ }^\circ\text{C}$  where a) coupled to establish C-H assignment and b) is decoupled.



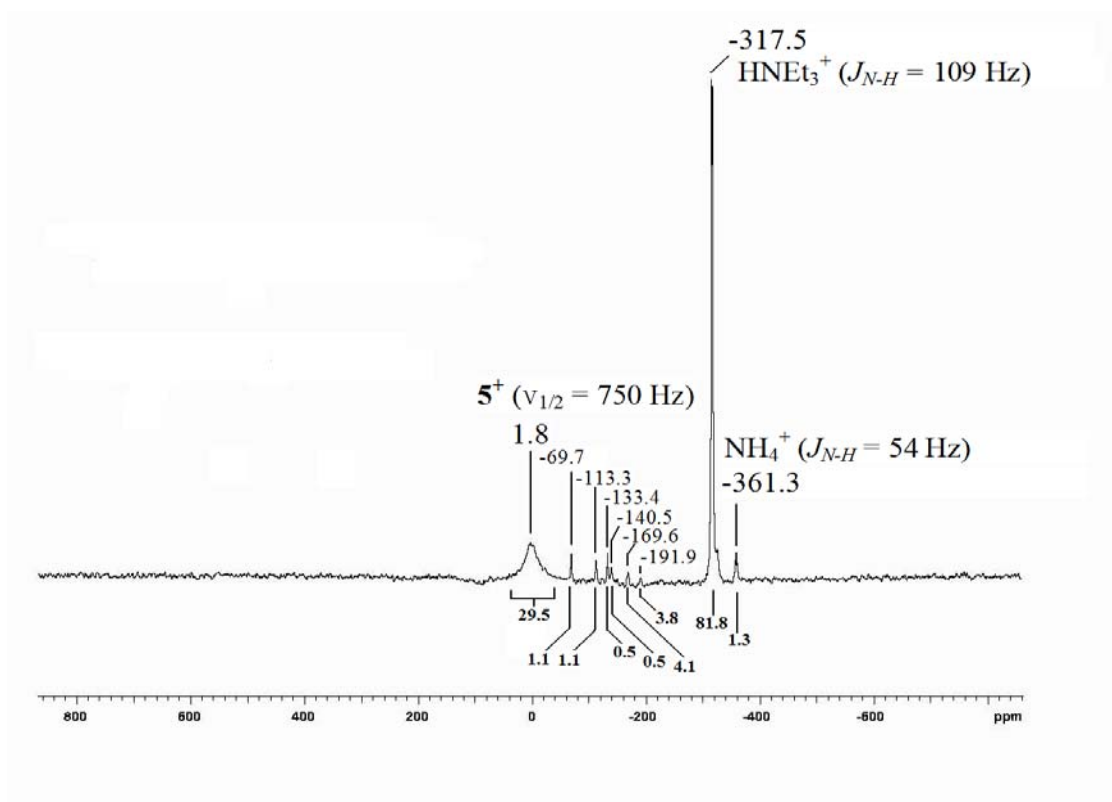

**Figure S22:**  $^{14}\text{N}$ -NMR of  $5\text{AsF}_6$  prepared according to Equation 5 in liquid  $\text{SO}_2$  at  $25\text{ }^\circ\text{C}$ .

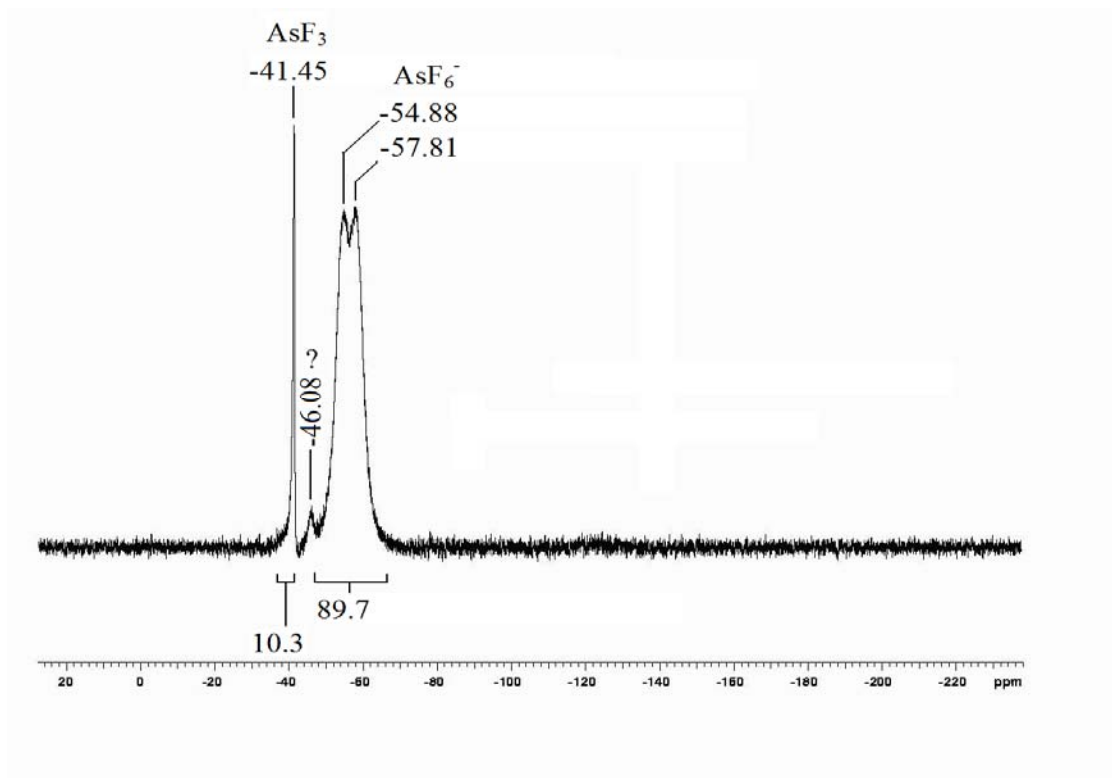

**Figure S23:**  $^{19}\text{F}$ -NMR of  $5\text{AsF}_6$  prepared according to Equation 5 in liquid  $\text{SO}_2$  at  $25\text{ }^\circ\text{C}$ .

#### 1.4.10 *In situ* reduction of $5\text{AsF}_6$ prepared according to Equation 5 with ferrocene ( $\text{Cp}_2\text{Fe}$ ) in $\text{CH}_2\text{Cl}_2$ and toluene according to Equation 9

$5\text{AsF}_6$  (0.020 g, 0.054 mmol) and  $\text{Cp}_2\text{Fe}$  (0.012 g, 0.065 mmol) were added to bulb A of a vessel of Type B (10 ml bulbs, Figure S1b) incorporating a 3 mm EPR tube directly attached via a 1/4 inch Pyrex tube.  $\text{CH}_2\text{Cl}_2$  (2.482 g; ~ 2 ml) and Toluene- $d^8$  (0.912 g; ~ 1 ml) were consecutively condensed into bulb A. Upon warming the solution to ambient temperature a pale yellow solution over a blue-grey solid (containing  $\text{CpFeAsF}_6$ ) was obtained. The solution was filtered into the EPR tube. The EPR consisted of a 1:1:1 triplet (Obs.  $a_N = 1.011$  mT; Calc.  $a_N = 1.063$  mT; See Figure 2b in main text of Chemical Communication and Table S6 for a comparison of experimental and calculated hyperfine coupling constants) which was very weak (very high gain needed) and is similar with  $2^\bullet$  (c.f. 1.089 mT)<sup>15</sup> and related 1,3,2-dithiazolyl radicals.<sup>21</sup> Modulation amplitude 0.2 mT, spectral width 5 mT, sweep time 60s, gain  $9 \times 10^2$ .

#### 1.4.11 Reduction of $5\text{AsF}_6$ prepared according to Equation 5 with ferrocene ( $\text{Cp}_2\text{Fe}$ ) in $\text{CH}_2\text{Cl}_2$ according to Equation 9

$5\text{AsF}_6$  (0.378 g, 1.01 mmol) and  $\text{Cp}_2\text{Fe}$  (0.183 g, 0.98 mmol) were loaded in to bulb A of a vessel of Type B (10 ml bulbs, Figure S1b) incorporating a 3 mm ESR tube directly attached by a 1/4 inch Pyrex tube.  $\text{CH}_2\text{Cl}_2$  (6.688 g; ~ 5 ml) was condensed into bulb A. A pale blue solution over a purple-brown solid was obtained upon warming to ambient temperature. The solution was stirred for 2 hrs and the more soluble fraction filtered to bulb B. The ESR of this more soluble fraction was a very weak 1:1:1 triplet (Figure S24). The volatiles were condensed back to bulb A and the more soluble fraction washed to bulb B. This was repeated several times. The volatiles were removed under dynamic vacuum and  $\text{SO}_2$  (4.139 g) condensed into bulb A. The more soluble blue-green (c.f.  $\text{Cp}_2\text{FeAsF}_6$ ) solution over the purple-brown insoluble was filtered to bulb B. The volatiles were condensed back to bulb A. The purple-brown solid was washed until the filtrate was colorless (3 times total). The volatiles were removed under dynamic vacuum. The purple brown insoluble in bulb A (0.147 g, 0.80 mmol and 79 % yield of  $5^\bullet$  based on  $5(\text{AsF}_6)$  and Equation 9) and the blue solid (c.f.  $\text{Cp}_2\text{FeAsF}_6$ ) in bulb B (0.398 g) were collected in the drybox. The IR of the purple-brown solid in bulb A was obtained as a Nujol mull on KBr plates and was consistent with  $5^\bullet$  (Figure S25) on comparison of the experimental and calculated IR given in Table S7. We note the assigned  $\nu$  C=O of  $5^\bullet$  is at  $1643\text{ cm}^{-1}$  (c.f.  $\nu$  C=O of  $5^+$  is  $1688\text{ cm}^{-1}$ ). The tentative assignment of  $688$  and  $388\text{ cm}^{-1}$  to  $\nu_3 \text{AsF}_6^-$  and  $\nu_4 \text{AsF}_6^-$ , respectively are attributed to the presence of  $\text{Cp}_2\text{FeAsF}_6$ .

#### Equation 9:

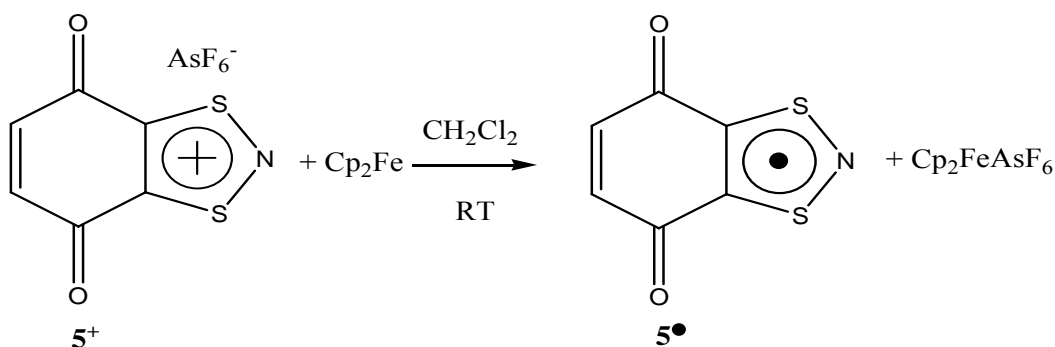

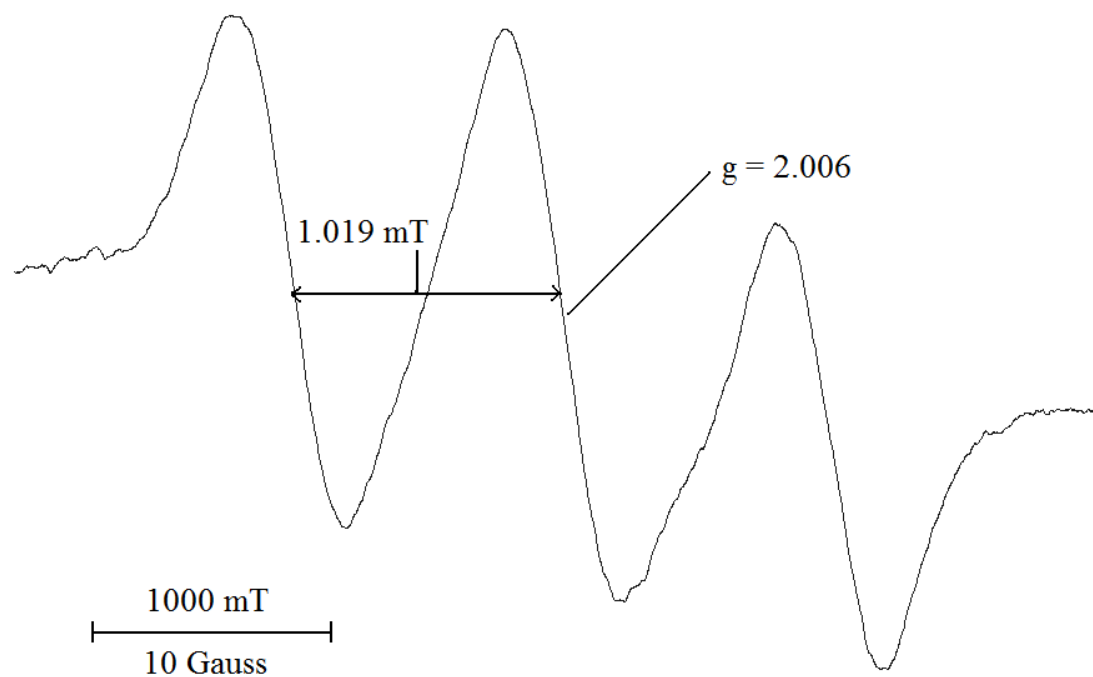

**Figure S24:** The X-band EPR of  $5^{\bullet}$  prepared according to Equation 9 in  $\text{CH}_2\text{Cl}_2$  at  $25\text{ }^{\circ}\text{C}$  (Sweep width 5 mT, Sweep time 90 s, Modulation amplitude 0.4 mT, gain  $9 \times 10^2$ )

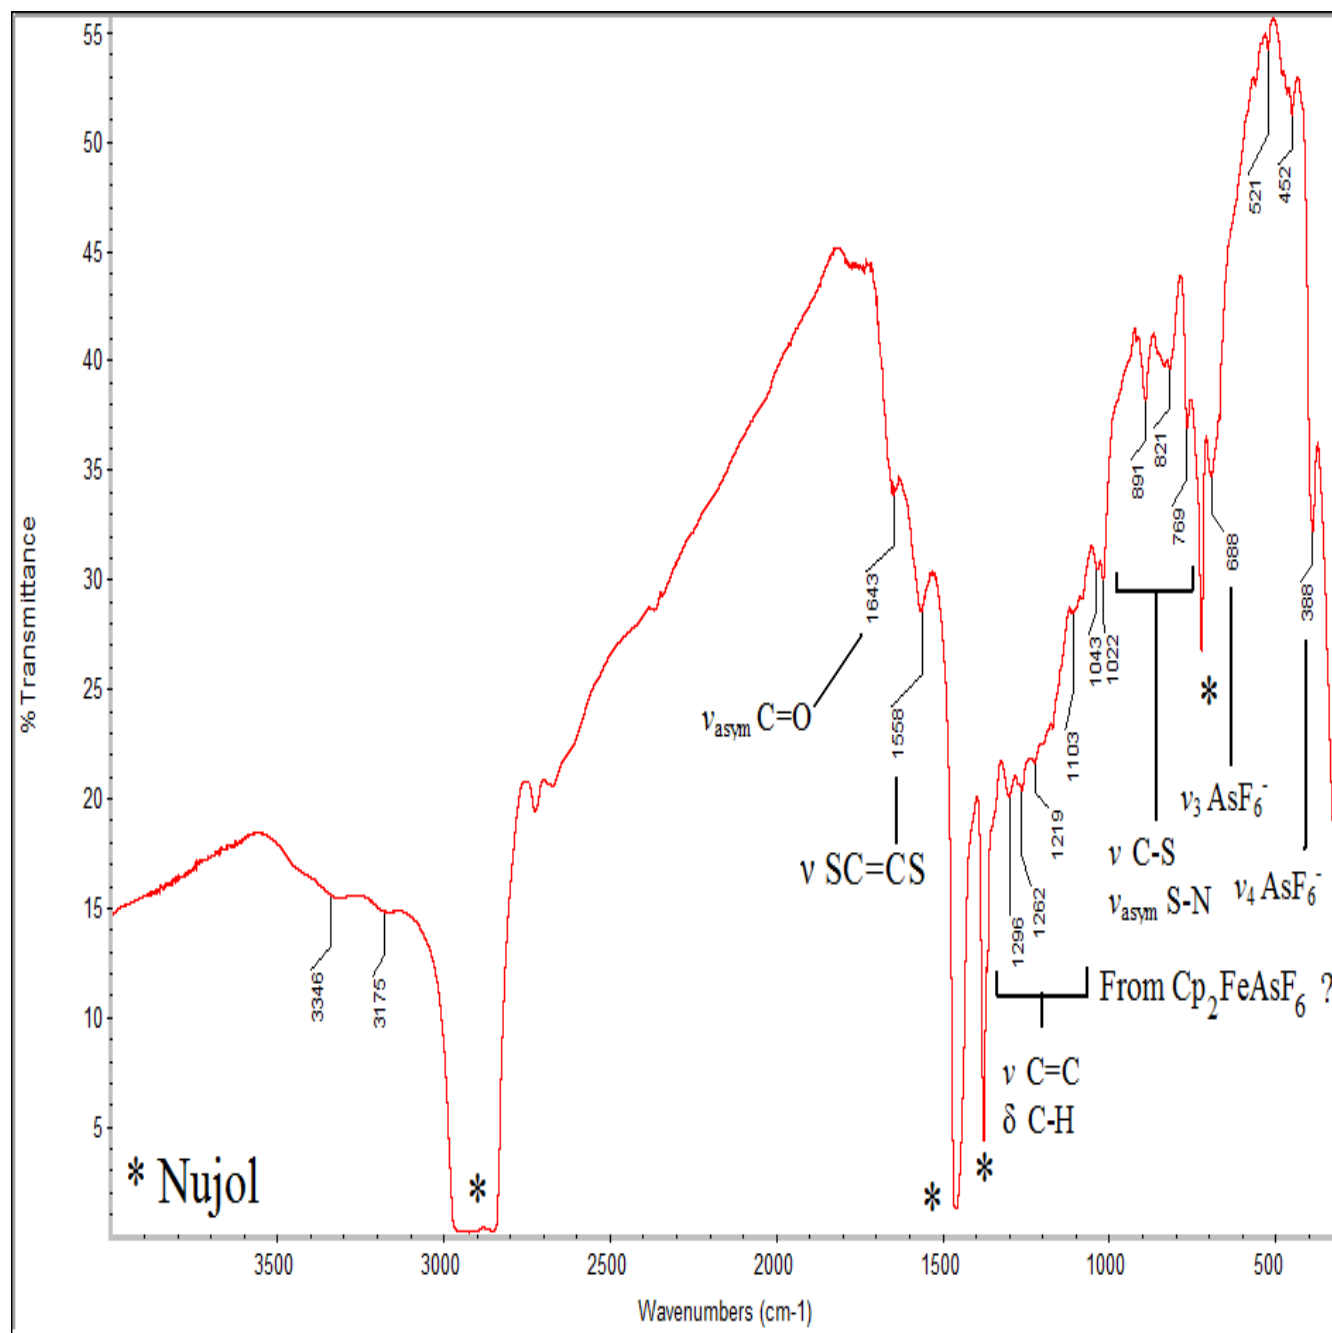

**Figure S25:** The FT-IR of **5\*** prepared according to Equation 9 as a Nujol mull on KBr (32 scans,  $2\text{ cm}^{-1}$  resolution). See Table S10 for comparison of experimental and calculated IR frequencies and tentative assignments (Note the tentative assignments:  $\nu$  = stretch,  $\delta$  =bending, asym. = asymmetric and sym = symmetric):

#### 1.4.12 Reaction of $5\text{AsF}_6$ with excess $\text{SNSAsF}_6$ in $\text{SO}_2$ leading to $3(\text{AsF}_6)_2$ according to Equation 2-4 in Scheme 1

$5\text{AsF}_6$  (0.809 g, 2.17 mmol, see Section 1.4.8) and  $\text{SNSAsF}_6$  (1.029 g, 3.85 mmol) were added to bulb A of a vessel of Type B (Figure S1b).  $\text{SO}_2$  (15.347 g) was condensed onto the solid and a blue solution was obtained on warming to ambient temperature. The solution was stirred for 5 days. After 5 days a beige-white insoluble under a blue solution

was obtained. The more soluble fraction was filtered to bulb B. The volatiles were condensed back to bulb A. The more soluble fraction was filtered to bulb B. This was repeated (x 3) until the more soluble fraction over the beige-white insoluble in bulb A were clear and colorless. The volatiles were removed under dynamic vacuum and the beige white solid in bulb A was collected (1.428 g, 85 % yield of  $3(\text{AsF}_6)_2$  based on  $5\text{AsF}_6$  and Equation 9) in the drybox. The IR of the beige-white solid in bulb A was obtained as a Nujol mull on KBr plates (Figure S26a) but was poorly resolved which suggested a possible mixture of  $5(\text{AsF}_6)$  and  $3(\text{AsF}_6)_2$  by comparison to Figure S19 ( $5\text{AsF}_6$ ) and Figure S9 ( $3(\text{SbF}_6)_2$ ). See also the comparison of experimental and calculated IR frequencies given in Table S4.

The  $^{13}\text{C}$ -NMR ( $\text{CD}_3\text{CN}$ ,  $25^\circ\text{C}$ ) of the beige-white solid from bulb A in a 10 mm Pyrex NMR tube indicate the presence of only two resonances,  $\delta$  -178.6 and  $\delta$  156.0 assigned to C=O and C-S of  $3^{2+}$  respectively (Figure S27). The calculated and experimental  $^{13}\text{C}$ -NMR of  $3^{2+}$  are compared with related 1,3,2-dithiazolyls in Table S2.

### Overall summary of Equation 3-4 in Scheme 1:

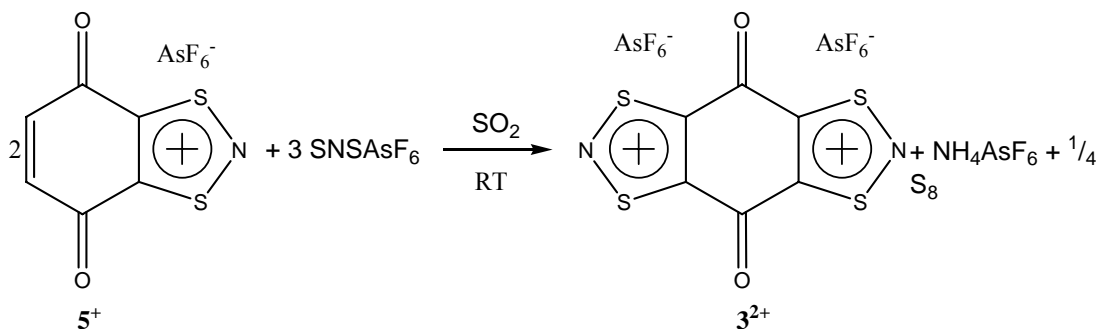

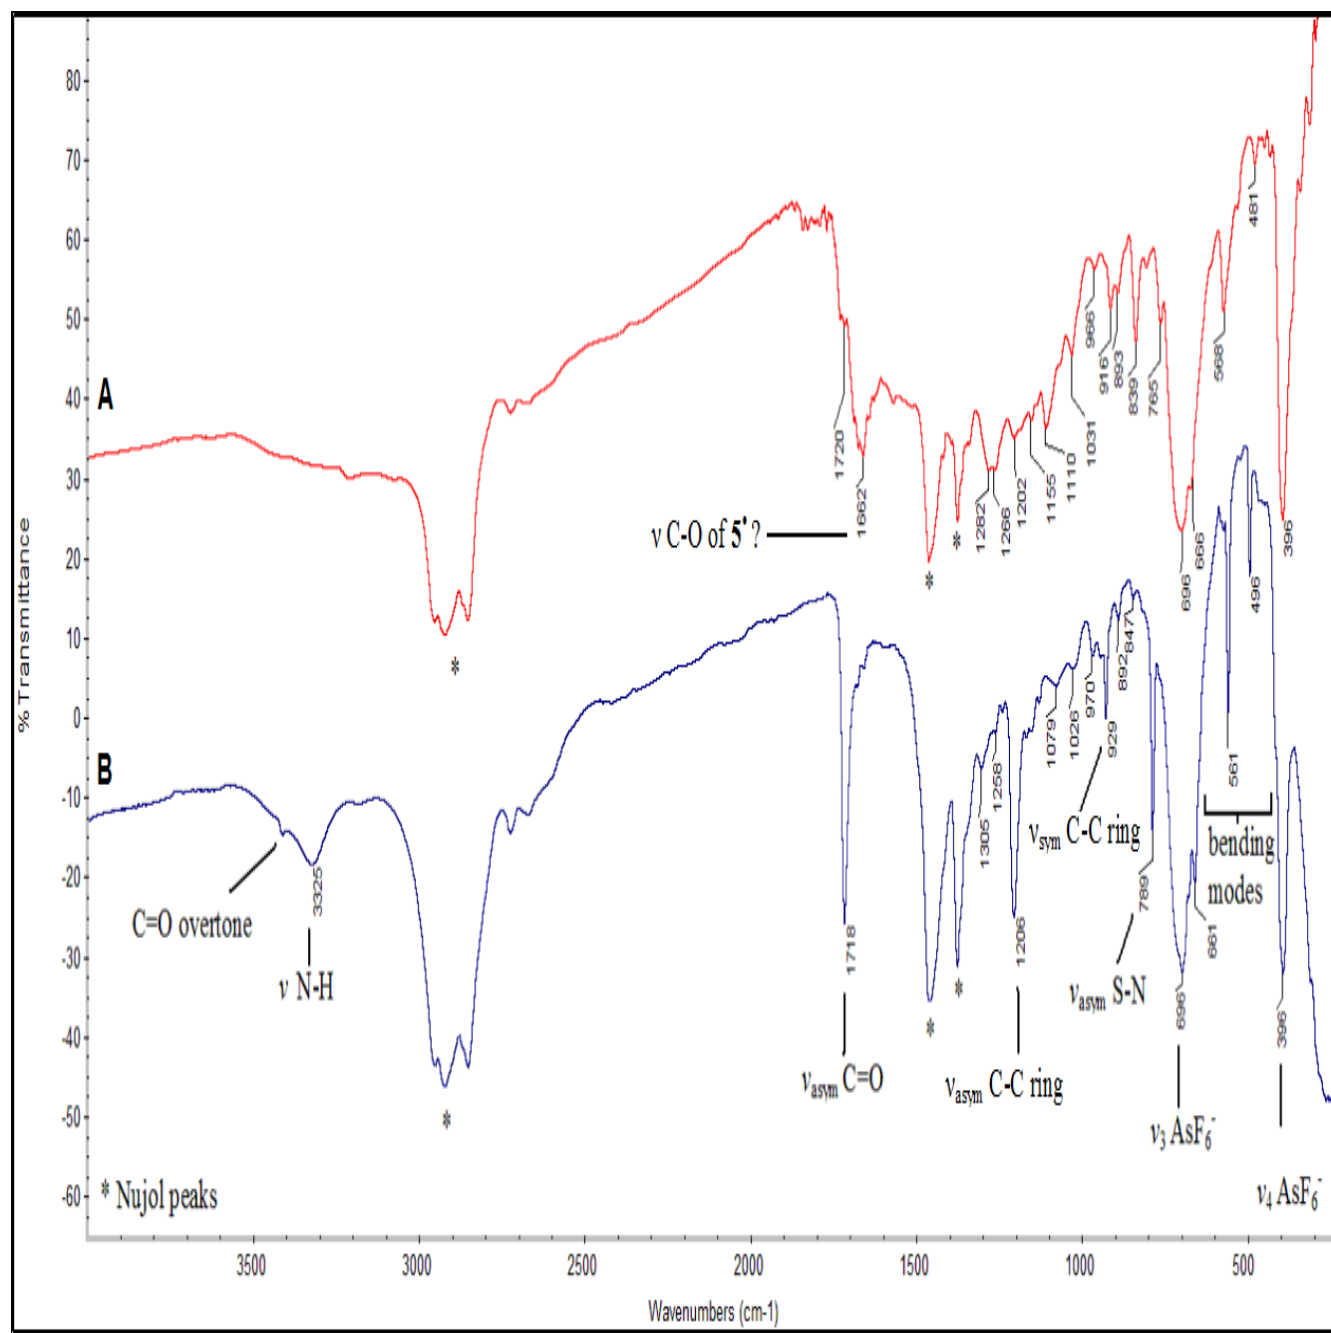

**Figure S26:** FT-IR of a) crude  $3(\text{AsF}_6)_2$  prepared according to Equation 3-4 in Scheme 1 and b) purified  $3(\text{AsF}_6)_2$  (Section 1.4.13, below) as Nujol mull on KBr plates (32 scans, 2 cm<sup>-1</sup> resolution). See Table S4 for comparison of experimental and calculated IR frequencies and tentative assignments (Note the tentative assignments:  $\nu$  = stretch,  $\delta$  =bending, asym. = asymmetric and sym = symmetric):

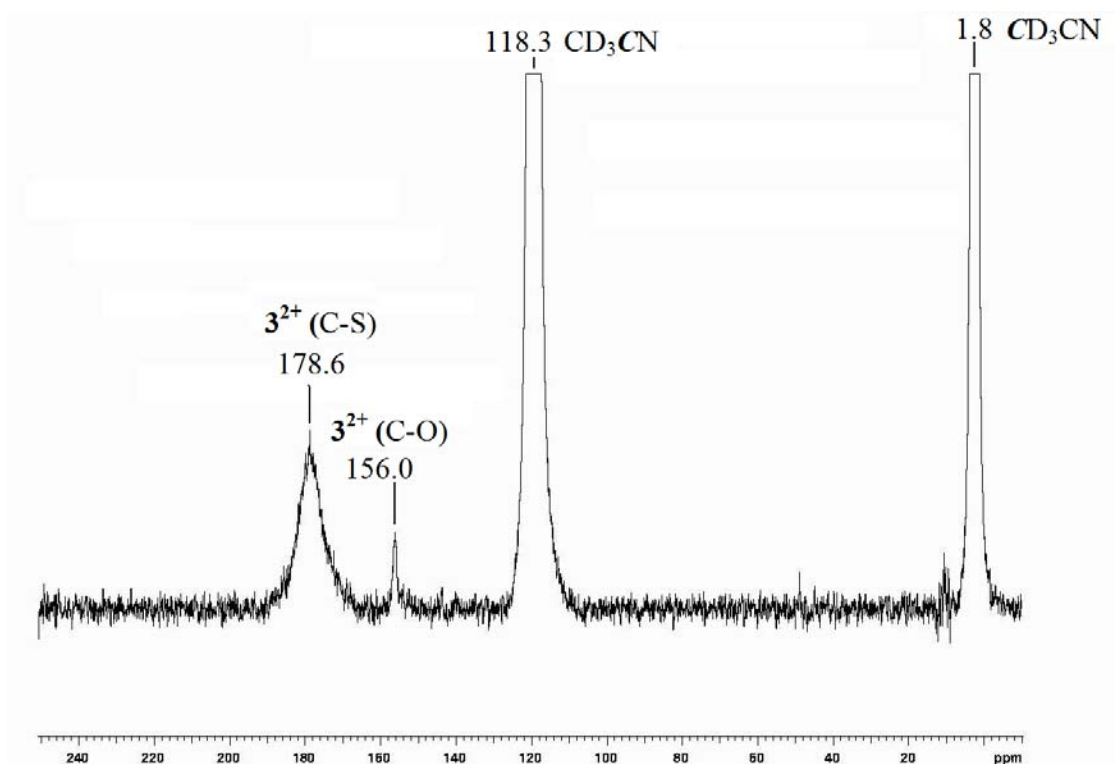

**Figure S27:** The  $^{13}\text{C}$ -NMR ( $\text{CD}_3\text{CN}$ ,  $25\text{ }^\circ\text{C}$ ) of  $3(\text{AsF}_6)_2$  prepared according to Equation 3-4 in Scheme 1

#### 1.4.13 Purification of $3(\text{AsF}_6)_2$ prepared according to Equation 3-4 in Scheme 1 from $\text{CH}_3\text{CN}$ and $\text{CH}_2\text{Cl}_2$

Crude  $3(\text{AsF}_6)_2$  (1.398 g) was added to bulb A of a vessel of Type B (Figure S1b).  $\text{CH}_3\text{CN}$  (8.671 g; ~ 11 ml) was condensed into bulb A. A red solution was obtained on warming to ambient temperature over a beige-white insoluble. The red solution quickly turned green-blue upon stirring for 5 minutes. The more soluble fraction was filtered to the bulb B and the volatiles condensed back into bulb A. The more soluble fraction was filtered to bulb B. This was repeated 3 more times.  $\text{CH}_2\text{Cl}_2$  (27.036 g; ~ 20 ml) was condensed into bulb B. Upon warming a green solution over clear colorless crystals were obtained. The more soluble fraction in bulb B was filtered into bulb A. A small volume (~ 2 ml) of the volatiles was condensed back to bulb B. The more soluble fraction was filtered to bulb A. This was repeated twice more. The volatiles were removed under dynamic vacuum. The clear colorless crystals in bulb B (0.812 g, 1.27 mmol, 68 % yield of  $3(\text{AsF}_6)_2$  based on  $5\text{AsF}_6$  and Equation 8) and the solid in bulb A (0.543 g) were collected in the drybox. The IR of the clear and colorless crystals in bulb B was obtained as a Nujol mull on CsI plates (Figure S26b) and was consistent with  $3(\text{AsF}_6)_2$  by comparison of the experimental and calculated IR frequencies given in Table S4. The X-ray crystal structure was determined (Figure S28) and the calculated and experimental bond lengths ( $\text{\AA}$ ) and angles ( $^\circ$ ) are compared in Table S3.

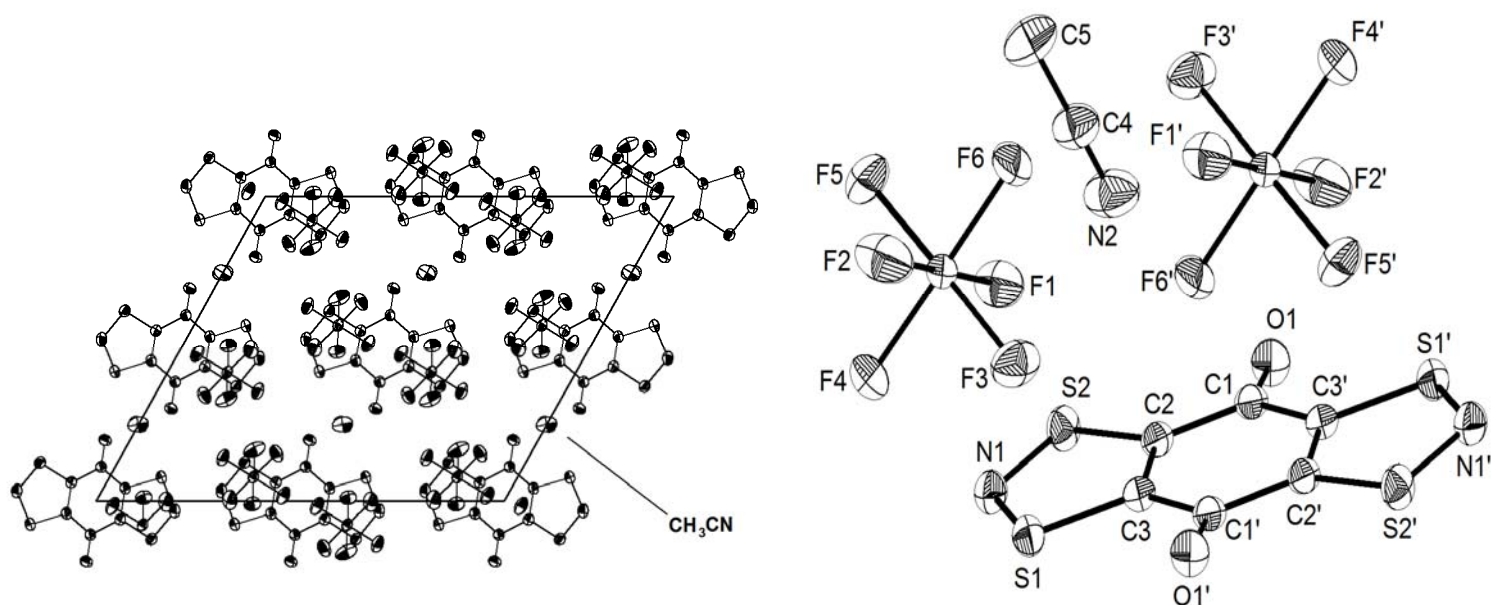

**Figure S28:** The X-ray crystal structure of  $3(\text{AsF}_6)_2 \cdot \text{CH}_3\text{CN}$  where a) a view of the unit cell along the b-axis and b) the atom labelling within the asymmetric unit. Thermal ellipsoids are given at 50 % probability. A comparison of experimental and calculated bond distances ( $\text{\AA}$ ) and angles ( $^\circ$ ) are given in Table S3.



## References:

- 1 D.R. Aris, C.Knapp, J. Passmore, and X. Wang, *J. Fluorine Chem.*, 2005, **126**, 1368.
- 2 (a) M. Murchie and J. Passmore, *Inorg. Synth.* 1988, **27**, 76. (b) M.P. Murchie, R. Kapoor, J. Passmore, and G. Schatte, T. Way, *Inorg. Synth.* 1997, **31**, 102.
- 3 H.E. Gottlieb, V. Kotlyer, and A. Nudelman, *J. Org. Chem.*, 1997, **62**, 7512.
- 4 M.J. Frisch, G.W. Trucks, H.B. Schlegel, G.E. Scuseria, M.A. Robb, J.R. Cheeseman, J.A. Montgomery Jr., T. Vreven, K. N. Kudin, J. C. Burant, J. M. Millam, S. S. Iyengar, J. Tomasi, V. Barone, B. Mennucci, M. Cossi, G. Scalmani, N. Rega, G. A. Petersson, H. Nakatsuji, M. Hada, M. Ehara, K. Toyota, R. Fukuda, J. Hasegawa, M. Ishida, T. Nakajima, Y. Honda, O. Kitao, H. Nakai, M. Klene, X. Li, J. E. Knox, H. P. Hratchian, J. B. Cross, V. Bakken, C. Adamo, J. Jaramillo, R. Gomperts, R. E. Stratmann, O. Yazyev, A. J. Austin, R. Cammi, C. Pomelli, J. W. Ochterski, P. Y. Ayala, K. Morokuma, G. A. Voth, P. Salvador, J. J. Dannenberg, V. G. Zakrzewski, S. Dapprich, A. D. Daniels, M. C. Strain, O. Farkas, D. K. Malick, A. D. Rabuck, K. Raghavachari, J. B. Foresman, J. V. Ortiz, Q. Cui, A. G. Baboul, S. Clifford, J. Cioslowski, B. B. Stefanov, G. Liu, A. Liashenko, P. Piskorz, I. Komaromi, R. L. Martin, D. J. Fox, T. Keith, M. A. Al-Laham, C. Y. Peng, A. Nanayakkara, M. Challacombe, P. M. W. Gill, B. Johnson, W. Chen, M.W. Wong, C. Gonzalez, and J. A. Pople, GAUSSIAN 03, Revision C. 02, Gaussian, Inc., Wallingford, CT, 2004.
- 5 S. Brownridge, J. Passmore, X. Sun, *Can. J. Chem.* 1998, **76**, 1220.
- 6 A. Decken, H.D.B. Jenkins, A. Mailman, J. Passmore and K.V. Shuvaev, *Inorg. Chim. Acta*, 2008, **361**, 521.
- 7 a) A.D. Becke, *J. Chem. Phys.*, 1993, **98**, 1372. b) C. Lee, W. Yang, and R.G. Parr, *Phys. Rev. B*, 1988, **37**, 785. c) P. J. Stevens., F. J. Devlin, C.F. Chablowski and M. J. Frisch, *J. Phys. Chem.*, 1994, **98**, 11623.
- 8 (a) R. Krishnan, J.S. Binkley, R. Seeger and J. Pople, *J. Chem. Phys.*, 1980, **72** 650. b) T. Clark, J. Chandrasekhar, P. v. R. Schleyer, *J. Comp. Chem.*, 1983, **4**, 294.
- 9 (a) C. Adamo, V. Barone, *J. Chem. Phys.*, 1998, **108**, 664. (b) E. Cancès, B. Mennucci, J. Tomasi, *J. Chem. Phys.*, 1997, **107**, 3032. (c) M. Cossi, V. Barone, B. Mennucci, J. Tomasi, *Chem. Phys. Lett.*, 1998, **286**, 253.
- 10 (a) J.P. Perdew, K. Burke, M. Ernserhof, *Phys. Rev. Lett.*, 1997, **78**, 1396. (b) J.P. Perdew, M. Ernserhof, K. Burke, *J. Chem. Phys.*, 1996, **105**, 9982. (c) C. Adamo, V. Barone, *J. Chem. Phys.*, 1999, **110**, 6158.
- 11 C. Adamo, V. Barone, *Chem. Phys. Lett.*, 1997, **274**, 242.
- 12 V. Barone, in: D.P. Chong (Ed.), *Recent Advances in Density Functional Methods, Part I*, World Scientific, Singapore, 1996.
- 13 M. J. Frisch, G. W. Trucks, H. B. Schlegel, G. E. Scuseria, M. A. Robb, J. R. Cheeseman, V. G. Zakrzewski, J. A. Montgomery Jr., R. E. Stratmann, J. C. Burant, S. Dapprich, J. M. Millam, A. D. Daniels, K. N. Kudin, M. C. Strain, O. Farkas, J. Tomasi, V. Barone, M. Cossi, R. Cammi, B. Mennucci, C. Pomelli, C. Adamo, S. Clifford, J. Ochterski, G. A. Petersson, P. Y. Ayala, Q. Cui, K. Morokuma, D.K. Malick, A. D. Rabuck, K. Raghavachari, J. B. Foresman, J. Cioslowski, J. V. Ortiz, B. B. Stefanov, G. Liu, A. Liashenko, P. Piskorz, I. Komaromi, R. Gomperts, R. L. Martin, D. J. Fox, T. Keith, M. A. Al-Laham, C. Y. Peng, A. Nanayakkara, C. Gonzalez, M. Challacombe, P. M. W. Gill, B. G. Johnson, W. Chen, M. W. Wong, J. L. Andres, M. Head-Gordon, E. S. Replogle, J. A. Pople, *Gaussian 98*, revision A.7, Gaussian, Inc.: Pittsburgh, PA, 1998.
- 14 D. A. Zhurko, G. A. Zhurko, *ChemCraft 1.5*; Plimus: San Diego, CA, 92130; <http://www.chemcraftprog.com> (accessed Dec 2006).
- 15 A. Decken, A. Mailman, S. Mattar and J. Passmore, *Chem. Commun.*, 2005, 2366.
- 16 X. Zhao, H. Imahori, C.G. Zhan, Y. Sakata, S. Iwata and T. Kitagawa, *J. Phys. Chem. A*, 1997, **101**, 622.
- 17 J. Passmore and M.J. Schriver, *Inorg. Chem.*, 1988, **27**, 2749.
- 18 a) K. Terago, J. Olah, J.M.L. Martin, T. Veszpremi, C. van Alsenoy and F. Blockhuys, *Chem. Phys. Lett.*, 2005, **413**, 440. b) J. van Droogenbroeck, K. Tersago, C. van Alsenoy and F. Blockhuys, *Chem. Phys. Lett.*, 2004, 399, 516. c) J. van Droogenbroeck, K. Tersago, C. van Alsenoy, S.M. Aucott, H.L. Hutton, J.D. Woollins and F. Blockhuys, *Eur. J. Inorg. Chem.*, 2004, 3798.
- 19 a) G. MacLean, *Ph. D. Thesis*, University of New Brunswick, 1986. b) J. Passmore,
- 20 T.S. Cameron, A. Mailman, J. Passmore and K.V. Shuvaev, *Inorg. Chem.*, 2005, **44**, 6524.
- 21 a) J.M. Rawson, A. Alberola and A. Whalley, *J. Mater. Chem.*, 2006, **16**, 2560. b) J.M. Rawson and G.D. McManus, *Coord. Chem. Rev.*, 1999, **189**, 135.
- 22 a) K.A. Williams, M.J. Nowak, E. Dormann and F. Wudl, *Synth. Met.*, 1986, **14**, 233. b) G. Wolmershauser, M. Schnauber, T. Wilhelm and L.H. Sutcliffe, *Synth. Met.*, 1986, **14**, 239. c) E. Dormann, M.J. Nowak, K.A. Williams, R.O. Angus Jr., and F. Wudl, *J. Am. Chem. Soc.*, 1987, **109**, 2594.
- 23 E.G. Awere, N. Burford, R.C. Haddon, S. Parsons, J. Passmore, J.V. Waszczak and P.S. White, *J. Chem. Soc., Dalton Trans.*, 1990, 4281.

- 
- 24 W.V.F. Brooks, S. Brownridge, J. Passmore, M.J. Schriver and X. Sun, *J. Chem. Soc., Dalton Trans.*, 1996, 1997.  
25 J. Trotter, *Acta Cryst.* 1960, **13**, 86.
